# Supplementary material for: Insights into the regioselectivity and diastereoselectivity of the Nazarov cyclization of 3-alkenyl-2-indolylmethanol with tryptophol
Source: Royal Society of Chemistry journal article supplement (doi:10.1039/d2qo01896a), 2023-01-01
Supplement: d2qo01896a1.pdf [file d2qo01896a1.pdf]

*Supporting Information for*  
**Insights into the Regioselectivity and Diastereoselectivity of Nazarov  
Cyclization of 3-Alkenyl-2-indolylmethanol with Tryptophol**

Qi Cheng,<sup>a</sup> Wenxin Yan,<sup>a</sup> Tian Li,<sup>a</sup> Yinchun Jiao<sup>\*a,b</sup>, and Zilong Tang<sup>a,b</sup>

<sup>A</sup> *School of Chemistry and Chemical Engineering, Hunan University of Science and Technology, Xiangtan, 411201, China*

<sup>b</sup> *Key Laboratory of Theoretical Organic Chemistry and Functional Molecular, Ministry of Education, Hunan Provincial Key Laboratory of Controllable Preparation and Functional Application of Fine Polymers, Hunan University of Science and Technology, Xiangtan, 411201, China*

E-mail: [yinchunjiao@hmust.edu.cn](mailto:yinchunjiao@hmust.edu.cn)

**Contents:**

1. Catalytic model for simulation in reaction(S2-S6)
2. Electronic energies, enthalpies and free energies of all structures (S7-S9)
3. Imaginary frequencies of all TS structures (S10)
4. Quantum chemistry method-optimized structures (S11-S16)
5. Cartesian coordinates of DFT-computed structures (S17-S76)

# 1. Different catalytic models

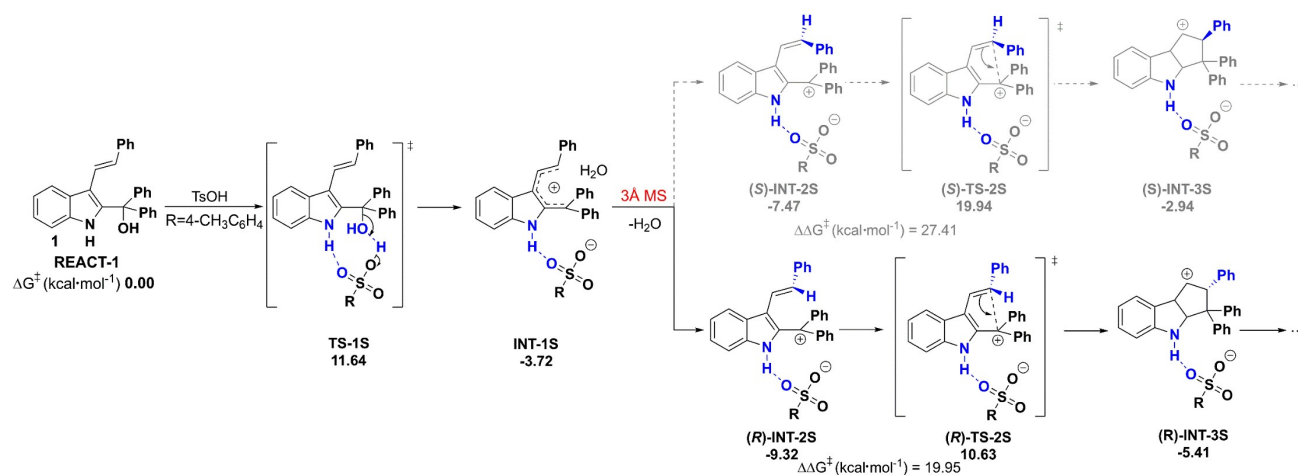

**Fig. S1** The different models of dehydration and cyclization for 3-alkenyl-2-indolylmethanol with TsOH

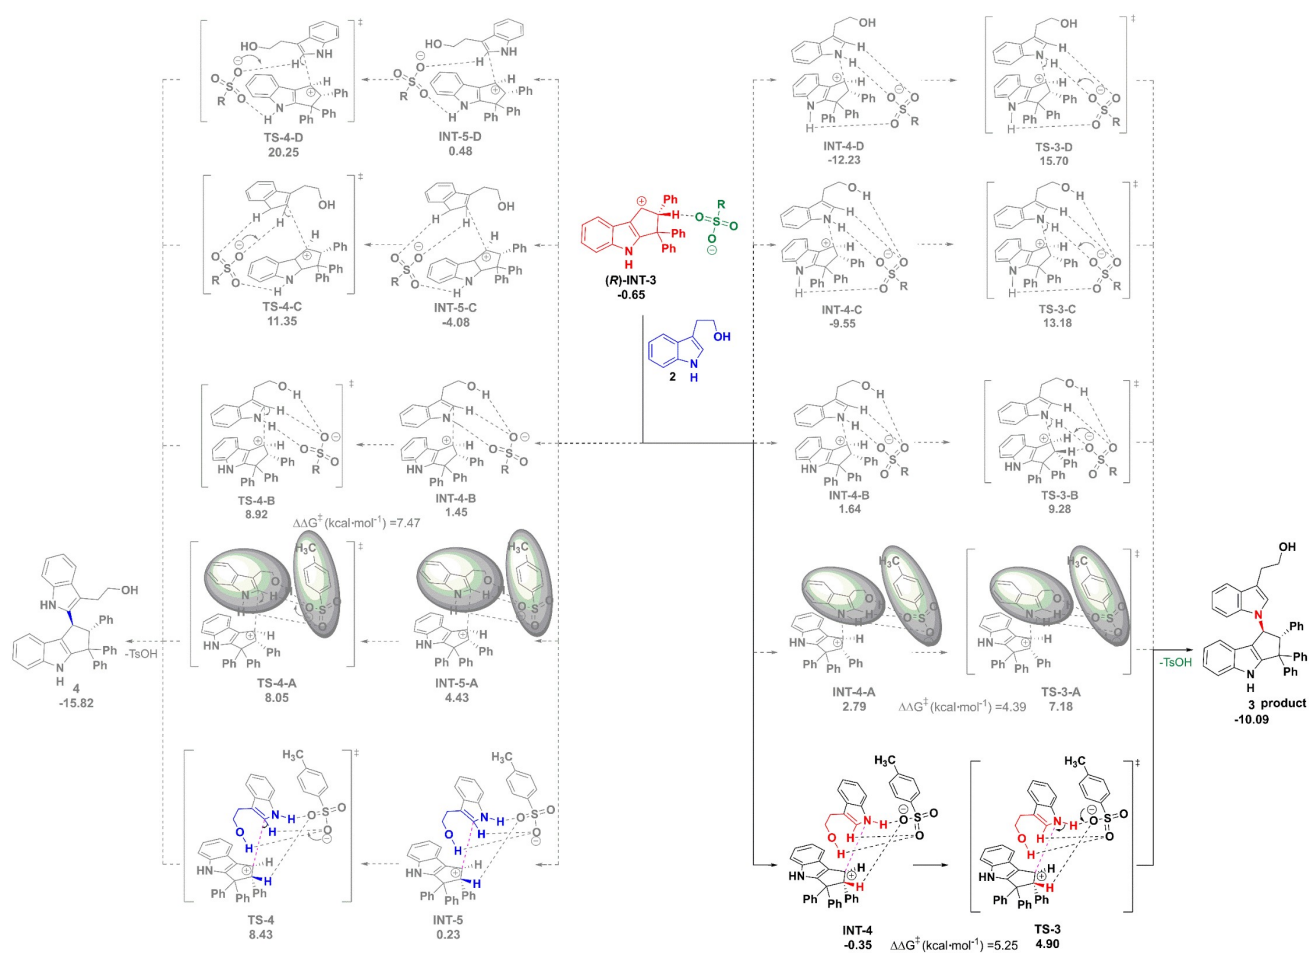

**Fig. S2** The different models of nucleophilic addition reaction at 303.15K with 3Å MS of **REACT-1**

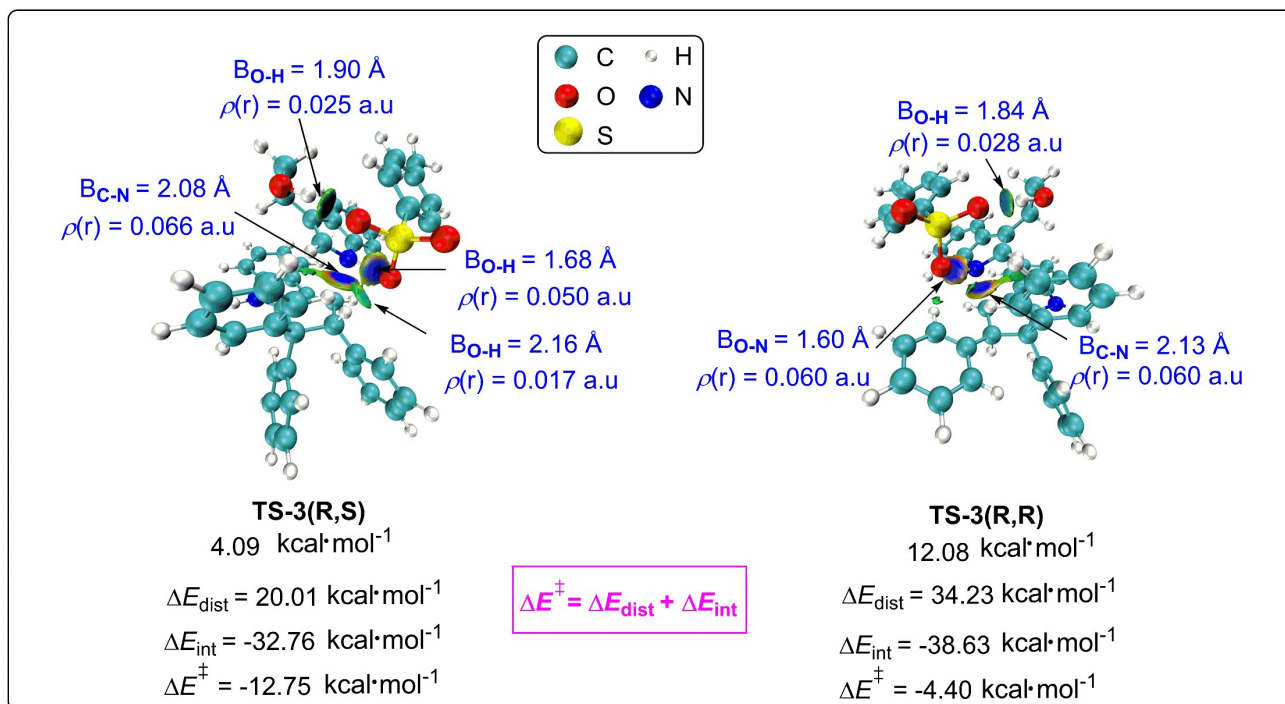

**Fig. S3** The IGMH (isovalue: 0.015), electron density  $\rho(r)$  (AIM theory) and distortion/interaction analysis for **TS-3(R,S)** and **TS-3(R,R)** in **REACT-1**

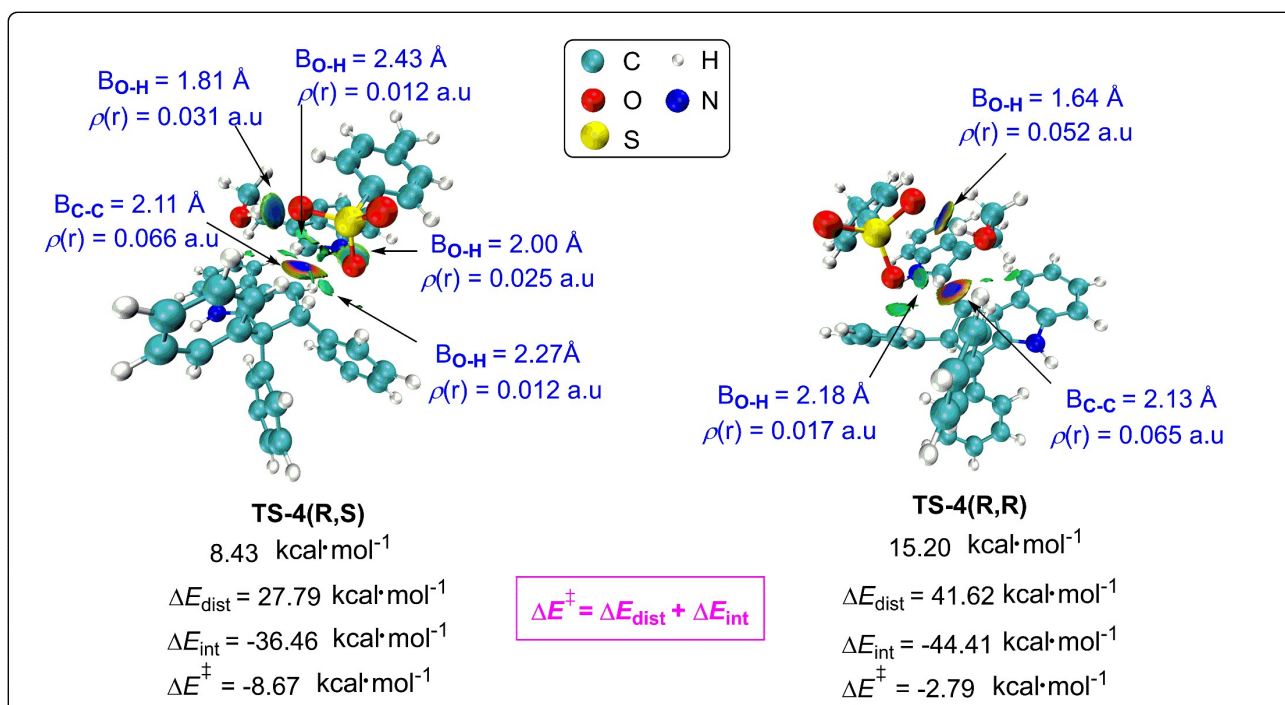

**Fig. S3** The IGMH (isovalue: 0.015), electron density  $\rho(r)$  (AIM theory) and distortion/interaction analysis for **TS-4(R,S)** and **TS-4(R,R)** in **REACT-1**

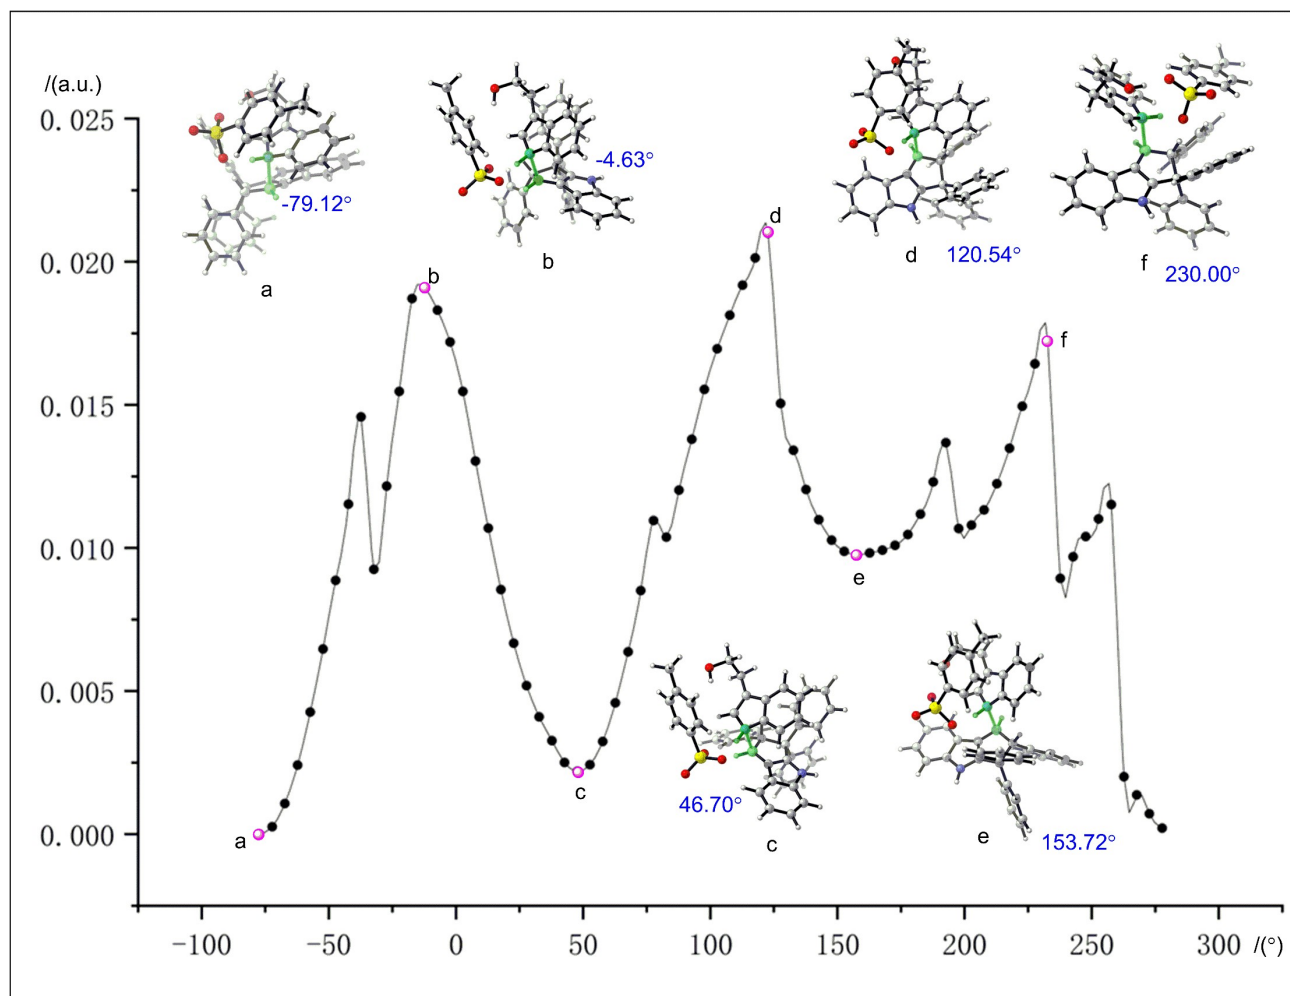

**Fig. S5** The restrictive optimization curves and structures of TS-3 in REACT-1

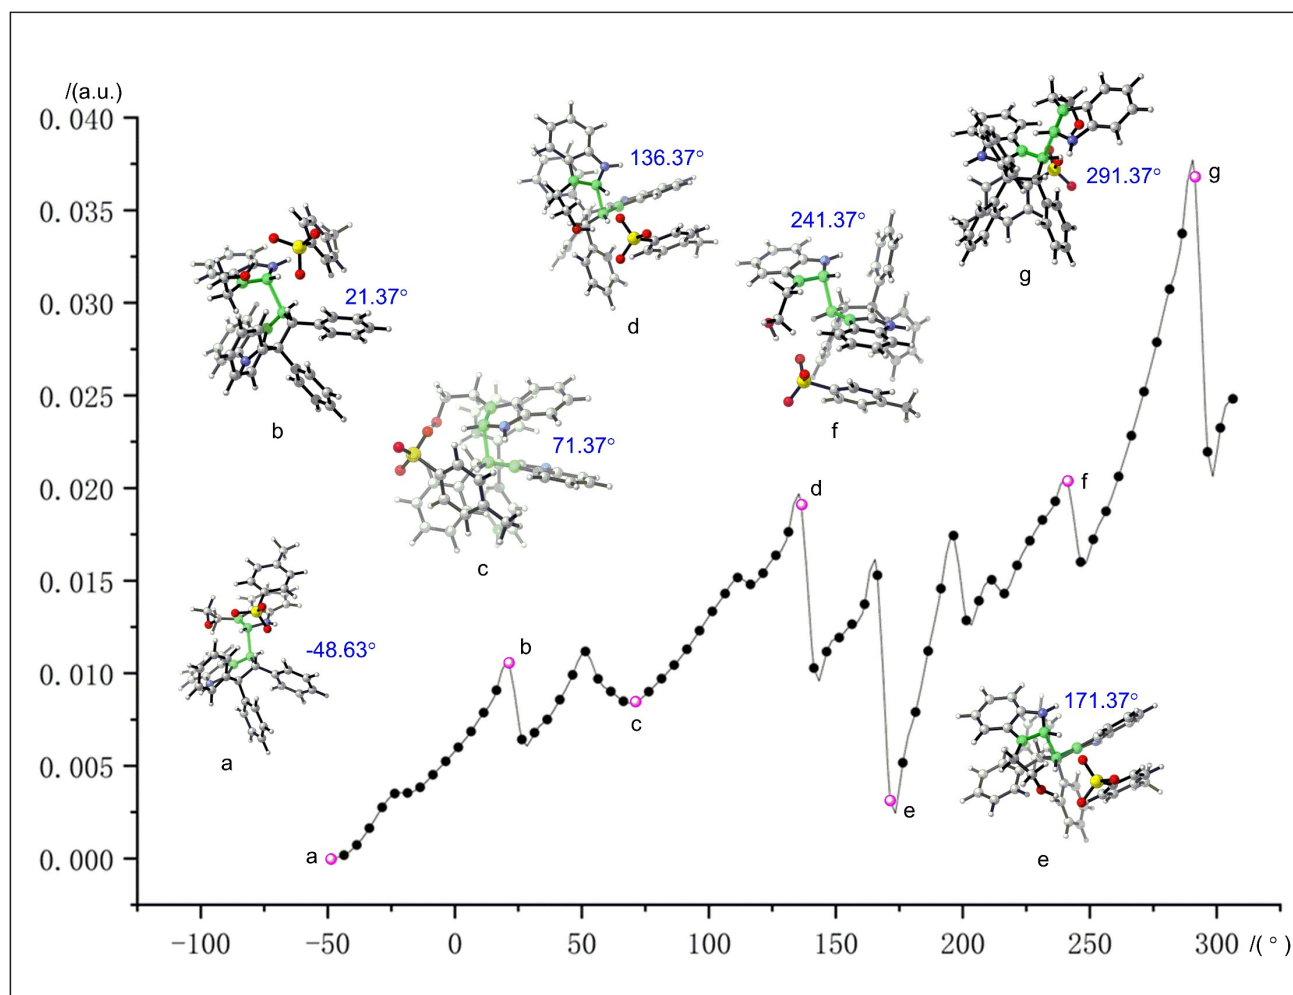

**Fig. S6** The restrictive optimization curves and structures of TS-4 in REACT-1

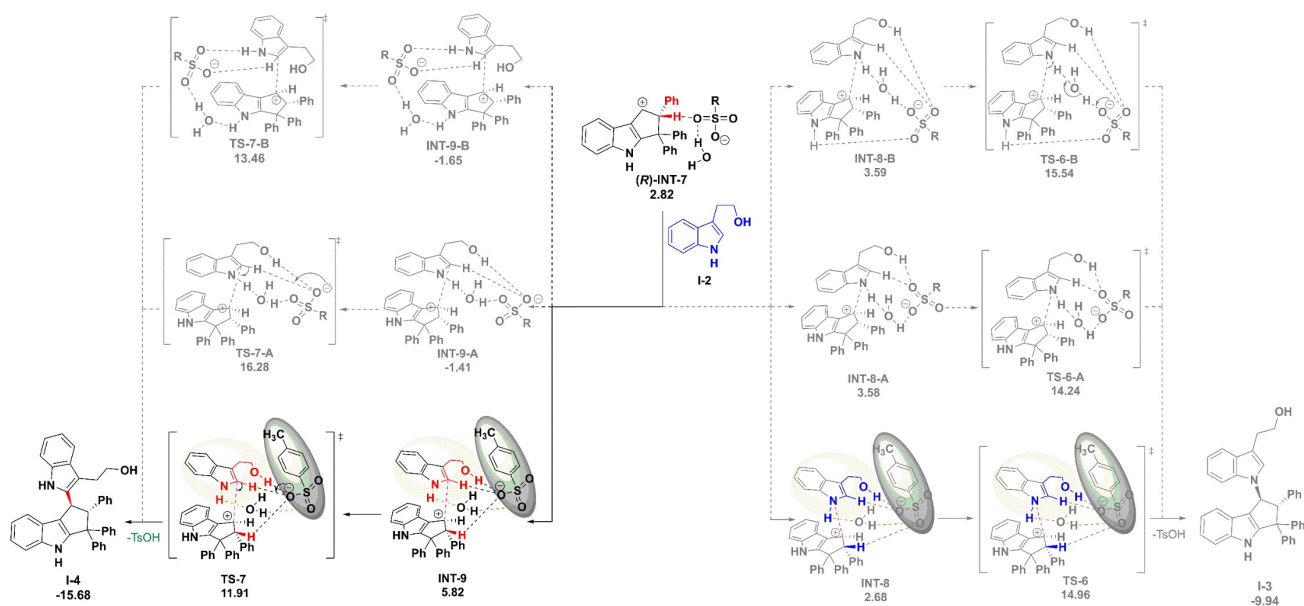

**Fig. S7** The different models of nucleophilic addition reaction at 313.15K without 3Å MS of REACT-2



(a) The reaction mechanism at 313.15K with 3Å MS

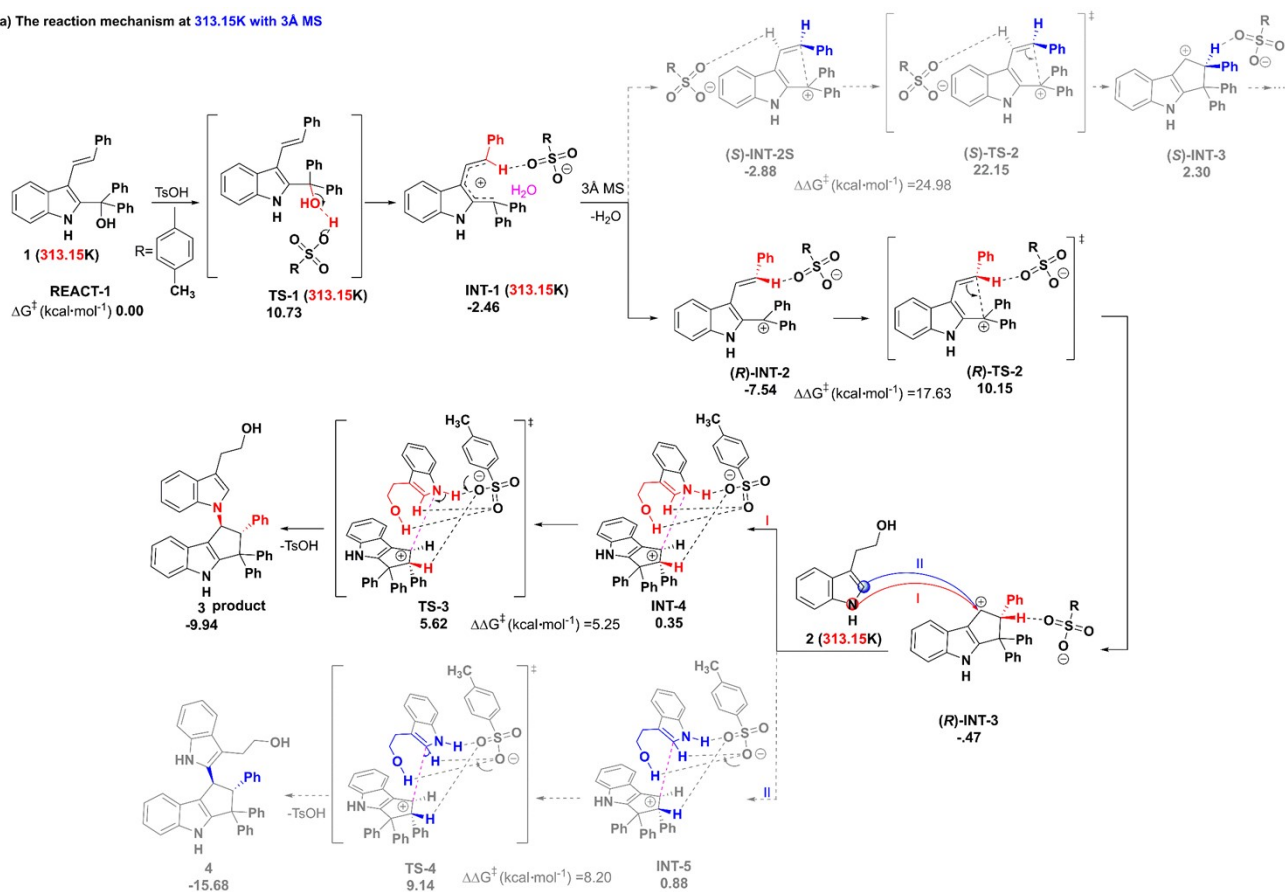

(b) The reaction mechanism at 303.15K without 3Å MS

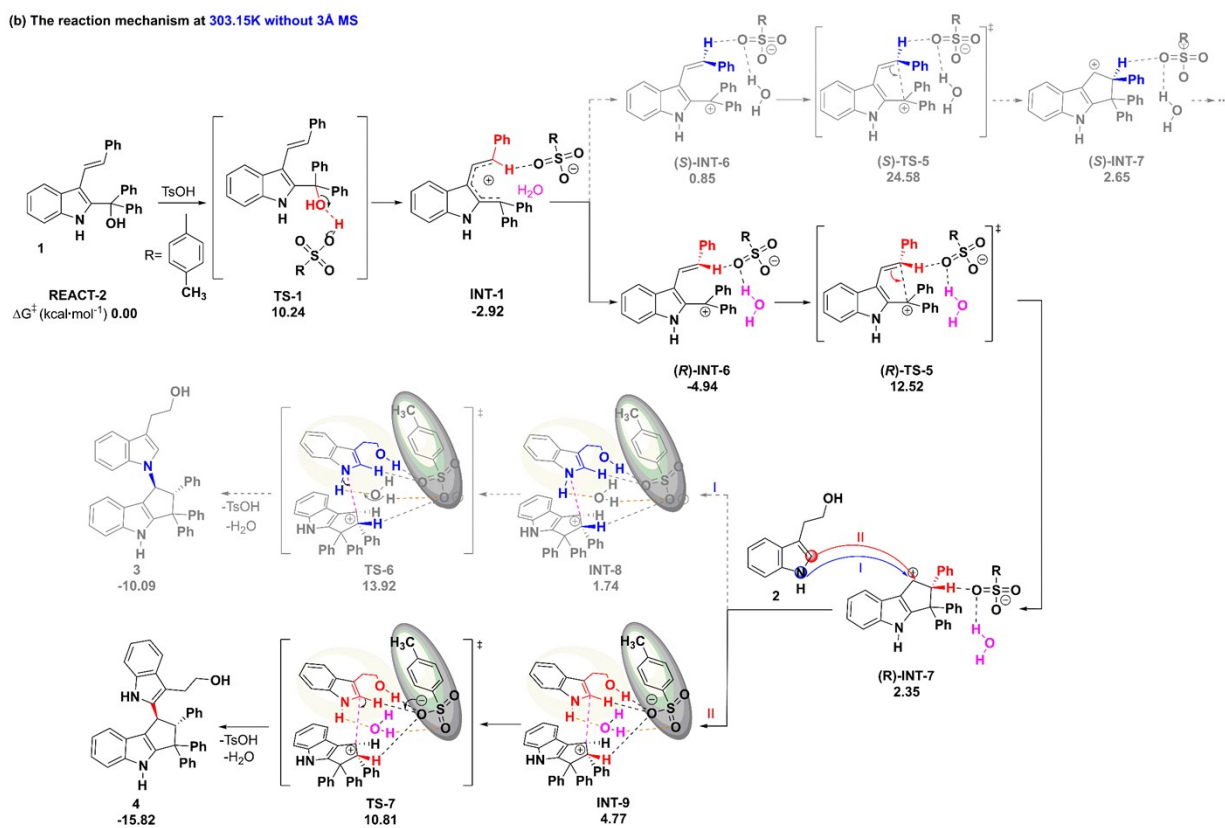

Fig. S8 The exchange conditional reaction mechanism was simulated with the presence of MS at 313K and the absence of MS at 303K

## 2. Electronic energies, enthalpies and free energies of all structures

**Table S1.** Electronic energies, enthalpies and free energies (in hartrees) computed at the level of B3LYP-D3(BJ)-SMD (chloroform)/6-311+G(d,p)//B3LYP-D3(BJ)/ 6-31G(d,p)

| Structure        | ZPE      | $\Delta H_{0 \rightarrow T}$ | $\Delta G_{0 \rightarrow T}$ | E            | H            | G            |
|------------------|----------|------------------------------|------------------------------|--------------|--------------|--------------|
| 1                | 0.439513 | 0.466211                     | 0.380929                     | -1249.391406 | -1248.925195 | -1249.010477 |
| 2                | 0.191621 | 0.203238                     | 0.1544                       | -517.86539   | -517.662152  | -517.710990  |
| TsOH             | 0.14221  | 0.154468                     | 0.102797                     | -895.585512  | -895.431044  | -895.482715  |
| H <sub>2</sub> O | 0.021364 | 0.025207                     | 0.003347                     | -76.466401   | -76.441194   | -76.463054   |
| TS-1             | 0.580957 | 0.619690                     | 0.506487                     | -2144.983359 | -2144.363669 | -2144.476872 |
| INT-1            | 0.582606 | 0.622742                     | 0.507609                     | -2145.005449 | -2144.382707 | -2144.497840 |
| (S)-INT-2        | 0.556598 | 0.593863                     | 0.48457                      | -2068.519499 | -2067.925636 | -2068.034929 |
| (S)-TS-2         | 0.556173 | 0.592503                     | 0.48596                      | -2068.481083 | -2067.88858  | -2067.995123 |
| (S)-INT-3        | 0.559055 | 0.595279                     | 0.488579                     | -2068.515322 | -2067.920043 | -2068.026743 |
| (R)-INT-2        | 0.557357 | 0.594554                     | 0.485883                     | -2068.52826  | -2067.933706 | -2068.042377 |
| (R)-TS-2         | 0.556946 | 0.593096                     | 0.487796                     | -2068.50208  | -2067.908984 | -2068.014284 |
| (R)-INT-3        | 0.558722 | 0.595014                     | 0.488047                     | -2068.519224 | -2067.92421  | -2068.031177 |
| INT-4            | 0.753327 | 0.801133                     | 0.67062                      | -2586.412305 | -2585.611172 | -2585.741685 |
| TS-3             | 0.753615 | 0.800495                     | 0.67162                      | -2586.404943 | -2585.604448 | -2585.733323 |
| 3                | 0.609607 | 0.645192                     | 0.54041                      | -1690.814908 | -1690.169716 | -1690.274498 |
| INT-5            | 0.753168 | 0.801236                     | 0.669126                     | -2586.409888 | -2585.608652 | -2585.740762 |
| TS-4             | 0.753341 | 0.800477                     | 0.67073                      | -2586.398429 | -2585.597952 | -2585.727699 |
| 4                | 0.609331 | 0.645352                     | 0.539787                     | -1690.823414 | -1690.178062 | -1690.283627 |
| TS-1S            | 0.581188 | 0.619380                     | 0.509197                     | -2144.983835 | -2144.364455 | -2144.474638 |
| INT-1S           | 0.581904 | 0.621954                     | 0.507527                     | -2145.006647 | -2144.384693 | -2144.499120 |
| (S)-INT-2S       | 0.557271 | 0.593931                     | 0.48732                      | -2068.529369 | -2067.935438 | -2068.042049 |
| (S)-TS-2S        | 0.554701 | 0.590654                     | 0.486189                     | -2068.484557 | -2067.893903 | -2067.998368 |
| (S)-INT-3S       | 0.558018 | 0.594166                     | 0.488332                     | -2068.523154 | -2067.928988 | -2068.034822 |
| (R)-INT-2S       | 0.556748 | 0.593696                     | 0.484836                     | -2068.529821 | -2067.936125 | -2068.044985 |
| (R)-TS-2S        | 0.555185 | 0.591061                     | 0.485969                     | -2068.499162 | -2067.908101 | -2068.013193 |
| (R)-INT-3S       | 0.557991 | 0.594124                     | 0.488808                     | -2068.527566 | -2067.933442 | -2068.038758 |
| INT-4A           | 0.753283 | 0.801349                     | 0.667953                     | -2586.404642 | -2585.603293 | -2585.736689 |
| TS-3A            | 0.753535 | 0.800538                     | 0.670858                     | -2586.40055  | -2585.600012 | -2585.729692 |
| INT-4B           | 0.753195 | 0.801492                     | 0.666999                     | -2586.405517 | -2585.604025 | -2585.738518 |
| TS-3B            | 0.753665 | 0.800771                     | 0.669119                     | -2586.395454 | -2585.594683 | -2585.726335 |
| INT-4C           | 0.752463 | 0.800381                     | 0.666745                     | -2586.423098 | -2585.622717 | -2585.756353 |
| TS-3C            | 0.753218 | 0.800171                     | 0.669347                     | -2586.389476 | -2585.589305 | -2585.720129 |
| INT-4D           | 0.753218 | 0.800171                     | 0.669347                     | -2586.389476 | -2585.589305 | -2585.720129 |
| TS-3D            | 0.751657 | 0.800117                     | 0.663084                     | -2586.423699 | -2585.623582 | -2585.760615 |
| INT-5A           | 0.753413 | 0.801395                     | 0.668955                     | -2586.403169 | -2585.601774 | -2585.734214 |
| TS-4A            | 0.753395 | 0.800449                     | 0.671139                     | -2586.399445 | -2585.598996 | -2585.728306 |
| INT-5B           | 0.752798 | 0.801217                     | 0.665338                     | -2586.404159 | -2585.602942 | -2585.738821 |
| TS-4B            | 0.753131 | 0.800419                     | 0.667596                     | -2586.394509 | -2585.59409  | -2585.726913 |
| INT-5C           | 0.752707 | 0.801153                     | 0.665581                     | -2586.413208 | -2585.612055 | -2585.747627 |
| TS-4C            | 0.751966 | 0.79967                      | 0.665098                     | -2586.388145 | -2585.588475 | -2585.723047 |
| INT-5D           | 0.751348 | 0.799812                     | 0.667277                     | -2586.407638 | -2585.607826 | -2585.740361 |
| TS-4D            | 0.752709 | 0.799997                     | 0.670815                     | -2586.379665 | -2585.579668 | -2585.708850 |
| TS-3(R,R)        | 0.752488 | 0.799367                     | 0.669725                     | -2586.391605 | -2585.592238 | -2585.721880 |
| TS-4(R,R)        | 0.753409 | 0.800221                     | 0.672132                     | -2586.38903  | -2585.588809 | -2585.716898 |

**Table S2.** Electronic energies, enthalpies and free energies (in hartrees) computed at the level of B3LYP-D3(BJ)-SMD(chloroform)/6-311+G(d,p)//B3LYP-D3(BJ)/ 6-31G(d,p) level

| Structure                      | ZPE      | $\Delta H_{0 \rightarrow T}$ | $\Delta G_{0 \rightarrow T}$ | E            | H            | G            |
|--------------------------------|----------|------------------------------|------------------------------|--------------|--------------|--------------|
| <b>1(313.15K)</b>              | 0.439513 | 0.467907                     | 0.378088                     | -1249.391406 | -1248.923499 | -1249.013318 |
| <b>2(313.15K)</b>              | 0.191621 | 0.203937                     | 0.152778                     | -517.86539   | -517.661453  | -517.712612  |
| <b>TsOH(313.15K)</b>           | 0.14221  | 0.155148                     | 0.10108                      | -895.585512  | -895.430364  | -895.484432  |
| <b>H<sub>2</sub>O(313.15K)</b> | 0.021364 | 0.025334                     | 0.002624                     | -76.466401   | -76.441067   | -76.463777   |
| <b>TS-1(313.15K)</b>           | 0.580957 | 0.62208                      | 0.502714                     | -2144.983359 | -2144.361279 | -2144.480645 |
| <b>INT-1(313.15K)</b>          | 0.582606 | 0.625189                     | 0.503771                     | -2145.005449 | -2144.38026  | -2144.501678 |
| <b>(S)-INT-6</b>               | 0.582698 | 0.62506                      | 0.504589                     | -2145.000221 | -2144.375161 | -2144.495632 |
| <b>(S)-TS-5</b>                | 0.58247  | 0.623612                     | 0.507961                     | -2144.96564  | -2144.342028 | -2144.457679 |
| <b>(S)-INT-7</b>               | 0.584373 | 0.625808                     | 0.508273                     | -2145.000956 | -2144.375148 | -2144.492683 |
| <b>(R)-INT-6</b>               | 0.582696 | 0.625175                     | 0.505736                     | -2145.010578 | -2144.385403 | -2144.504842 |
| <b>(R)-TS-5</b>                | 0.581943 | 0.623639                     | 0.504905                     | -2144.981904 | -2144.358265 | -2144.476999 |
| <b>(R)-INT-7</b>               | 0.583689 | 0.625693                     | 0.505104                     | -2144.998362 | -2144.372669 | -2144.493258 |
| <b>INT-8</b>                   | 0.778893 | 0.832855                     | 0.684783                     | -2662.890875 | -2662.05802  | -2662.206092 |
| <b>TS-6</b>                    | 0.779913 | 0.832314                     | 0.68908                      | -2662.875596 | -2662.043282 | -2662.186516 |
| <b>3(313.15K)</b>              | 0.609609 | 0.647468                     | 0.536918                     | -1690.814911 | -1690.167443 | -1690.277993 |
| <b>INT-9</b>                   | 0.779592 | 0.832874                     | 0.690414                     | -2662.891498 | -2662.058624 | -2662.201084 |
| <b>TS-7</b>                    | 0.779415 | 0.831868                     | 0.69194                      | -2662.883318 | -2662.05145  | -2662.191378 |
| <b>4(313.15K)</b>              | 0.609331 | 0.647642                     | 0.536267                     | -1690.823414 | -1690.175772 | -1690.287147 |
| <b>INT-8A</b>                  | 0.778425 | 0.832546                     | 0.685234                     | -2662.889892 | -2662.057346 | -2662.204658 |
| <b>TS-6A</b>                   | 0.779593 | 0.832242                     | 0.688729                     | -2662.876403 | -2662.044161 | -2662.187674 |
| <b>INT-8B</b>                  | 0.778305 | 0.831957                     | 0.686495                     | -2662.891142 | -2662.059185 | -2662.204647 |
| <b>TS-6B</b>                   | 0.779875 | 0.832228                     | 0.689291                     | -2662.874882 | -2662.042654 | -2662.185591 |
| <b>INT-9A</b>                  | 0.77869  | 0.83285                      | 0.68503                      | -2662.897642 | -2662.064792 | -2662.212612 |
| <b>TS-7A</b>                   | 0.778955 | 0.831918                     | 0.688001                     | -2662.872425 | -2662.040507 | -2662.184424 |
| <b>INT-9B</b>                  | 0.778655 | 0.832584                     | 0.685322                     | -2662.898308 | -2662.065724 | -2662.212986 |
| <b>TS-7B</b>                   | 0.778325 | 0.831496                     | 0.684318                     | -2662.873236 | -2662.04174  | -2662.188918 |

**Table S3.** Electronic energies, enthalpies and free energies (in hartrees) computed at the B3LYP-D3(BJ)-SMD(chloroform)/6-311+G(d,p)//B3LYP-D3(BJ)/ 6-31G(d,p) level at 313.15K with 3Å MS

| Structure        | ZPE      | $\Delta H_{0 \rightarrow T}$ | $\Delta G_{0 \rightarrow T}$ | E            | H            | G            |
|------------------|----------|------------------------------|------------------------------|--------------|--------------|--------------|
| <b>(S)-INT-2</b> | 0.556599 | 0.596163                     | 0.48093                      | -2068.519498 | -2067.923335 | -2068.038568 |
| <b>(S)-TS-2</b>  | 0.556174 | 0.594769                     | 0.482409                     | -2068.481085 | -2067.886316 | -2067.998676 |
| <b>(S)-INT-3</b> | 0.559054 | 0.597544                     | 0.485023                     | -2068.515328 | -2067.917784 | -2068.030305 |
| <b>(R)-INT-2</b> | 0.557358 | 0.596851                     | 0.482272                     | -2068.528256 | -2067.931405 | -2068.045984 |
| <b>(R)-TS-2</b>  | 0.556946 | 0.595352                     | 0.484286                     | -2068.50208  | -2067.906728 | -2068.017794 |
| <b>(R)-INT-3</b> | 0.558725 | 0.597282                     | 0.484496                     | -2068.519221 | -2067.921939 | -2068.034725 |
| <b>INT-4</b>     | 0.753328 | 0.804128                     | 0.666269                     | -2586.412302 | -2585.608174 | -2585.746033 |
| <b>TS-3</b>      | 0.753615 | 0.803444                     | 0.667321                     | -2586.404943 | -2585.601499 | -2585.737622 |
| <b>INT-5</b>     | 0.753167 | 0.804235                     | 0.664715                     | -2586.409892 | -2585.605657 | -2585.745177 |
| <b>TS-4</b>      | 0.753341 | 0.803439                     | 0.666402                     | -2586.398429 | -2585.59499  | -2585.732027 |



**Table S4.** Electronic energies, enthalpies and free energies (in hartrees) computed at the B3LYP-D3(BJ)-SMD(chloroform)/6-311+G(d,p)//B3LYP-D3(BJ)/ 6-31G(d,p) level at 303.15K without 3Å MS

| <b>Structure</b> | <b>ZPE</b> | <b><math>\Delta H_{0\rightarrow T}</math></b> | <b><math>\Delta G_{0\rightarrow T}</math></b> | <b>E</b>     | <b>H</b>     | <b>G</b>     |
|------------------|------------|-----------------------------------------------|-----------------------------------------------|--------------|--------------|--------------|
| <b>(S)-INT-6</b> | 0.582697   | 0.622612                                      | 0.508392                                      | -2145.000222 | -2144.37761  | -2144.491830 |
| <b>(S)-TS-5</b>  | 0.58247    | 0.621204                                      | 0.511615                                      | -2144.96564  | -2144.344436 | -2144.454025 |
| <b>(S)-INT-7</b> | 0.584374   | 0.623391                                      | 0.51199                                       | -2145.000955 | -2144.377564 | -2144.488965 |
| <b>(R)-INT-6</b> | 0.582696   | 0.622727                                      | 0.509509                                      | -2145.01058  | -2144.387853 | -2144.501071 |
| <b>(R)-TS-5</b>  | 0.581943   | 0.621228                                      | 0.508657                                      | -2144.981904 | -2144.360676 | -2144.473247 |
| <b>(R)-INT-7</b> | 0.58369    | 0.623272                                      | 0.508915                                      | -2144.998362 | -2144.37509  | -2144.489447 |
| <b>INT-8</b>     | 0.778892   | 0.829721                                      | 0.689458                                      | -2662.890872 | -2662.061151 | -2662.201414 |
| <b>TS-6</b>      | 0.779913   | 0.829233                                      | 0.693604                                      | -2662.875596 | -2662.046363 | -2662.181992 |
| <b>INT-9</b>     | 0.779592   | 0.829744                                      | 0.694913                                      | -2662.8915   | -2662.061756 | -2662.196587 |
| <b>TS-7</b>      | 0.779415   | 0.828772                                      | 0.696358                                      | -2662.883318 | -2662.054546 | -2662.186960 |

### 3. Imaginary frequencies of all TS structures

Table S5 Imaginary frequencies of all TS structures obtained for the cyclization reaction

| Structure          | Freq    | Infrared  | Structure                 | Freq    | Infrared  |
|--------------------|---------|-----------|---------------------------|---------|-----------|
| TS-1               | -229.80 | 180.7787  | <b>(S)</b> -TS-5          | -199.91 | 91.8740   |
| <b>(S)</b> -TS-2   | -289.08 | 130.2505  | <b>(R)</b> -TS-5          | -196.85 | 119.7448  |
| <b>(R)</b> -TS-2   | -184.98 | 118.7559  | TS-6                      | -196.76 | 432.3275  |
| TS-3               | -143.38 | 260.5229  | TS-7                      | -229.96 | 576.5198  |
| TS-4               | -256.24 | 879.4298  | TS-6A                     | -156.13 | 337.3217  |
| TS-3A              | -51.59  | 86.8241   | TS-6B                     | -296.02 | 432.6581  |
| TS-3B              | -123.38 | 274.6119  | TS-7A                     | -220.33 | 776.7593  |
| TS-3C              | -252.81 | 398.2547  | TS-7B                     | -415.70 | 1326.1066 |
| TS-3D              | -225.72 | 334.6538  | <b>(S)</b> -TS-2(313.15K) | -289.02 | 130.2540  |
| TS-4A              | -98.71  | 305.6275  | <b>(R)</b> -TS-2(313.15K) | -184.98 | 118.7559  |
| TS-4B              | -292.04 | 652.0233  | TS-3(313.15K)             | -143.38 | 260.5229  |
| TS-4C              | -397.76 | 1249.7912 | TS-4(313.15K)             | -256.25 | 879.4398  |
| TS-4D              | -342.23 | 1111.2319 | <b>(S)</b> -TS-5(303.15K) | -199.91 | 91.8729   |
| TS-3( <b>R,R</b> ) | -108.69 | 167.8863  | <b>(R)</b> -TS-5(303.15K) | -196.86 | 119.7464  |
| TS-4( <b>R,R</b> ) | -181.26 | 497.7148  | TS-6(303.15K)             | -196.75 | 432.3121  |
| TS-1(313.15K)      | -229.80 | 180.7819  | TS-7(303.15K)             | -229.96 | 576.5166  |

#### 4. Quantum chemistry method-optimized structures

Quantum chemistry method-optimized structures are illustrated using CYLView. Distances are shown in angstroms (Å).

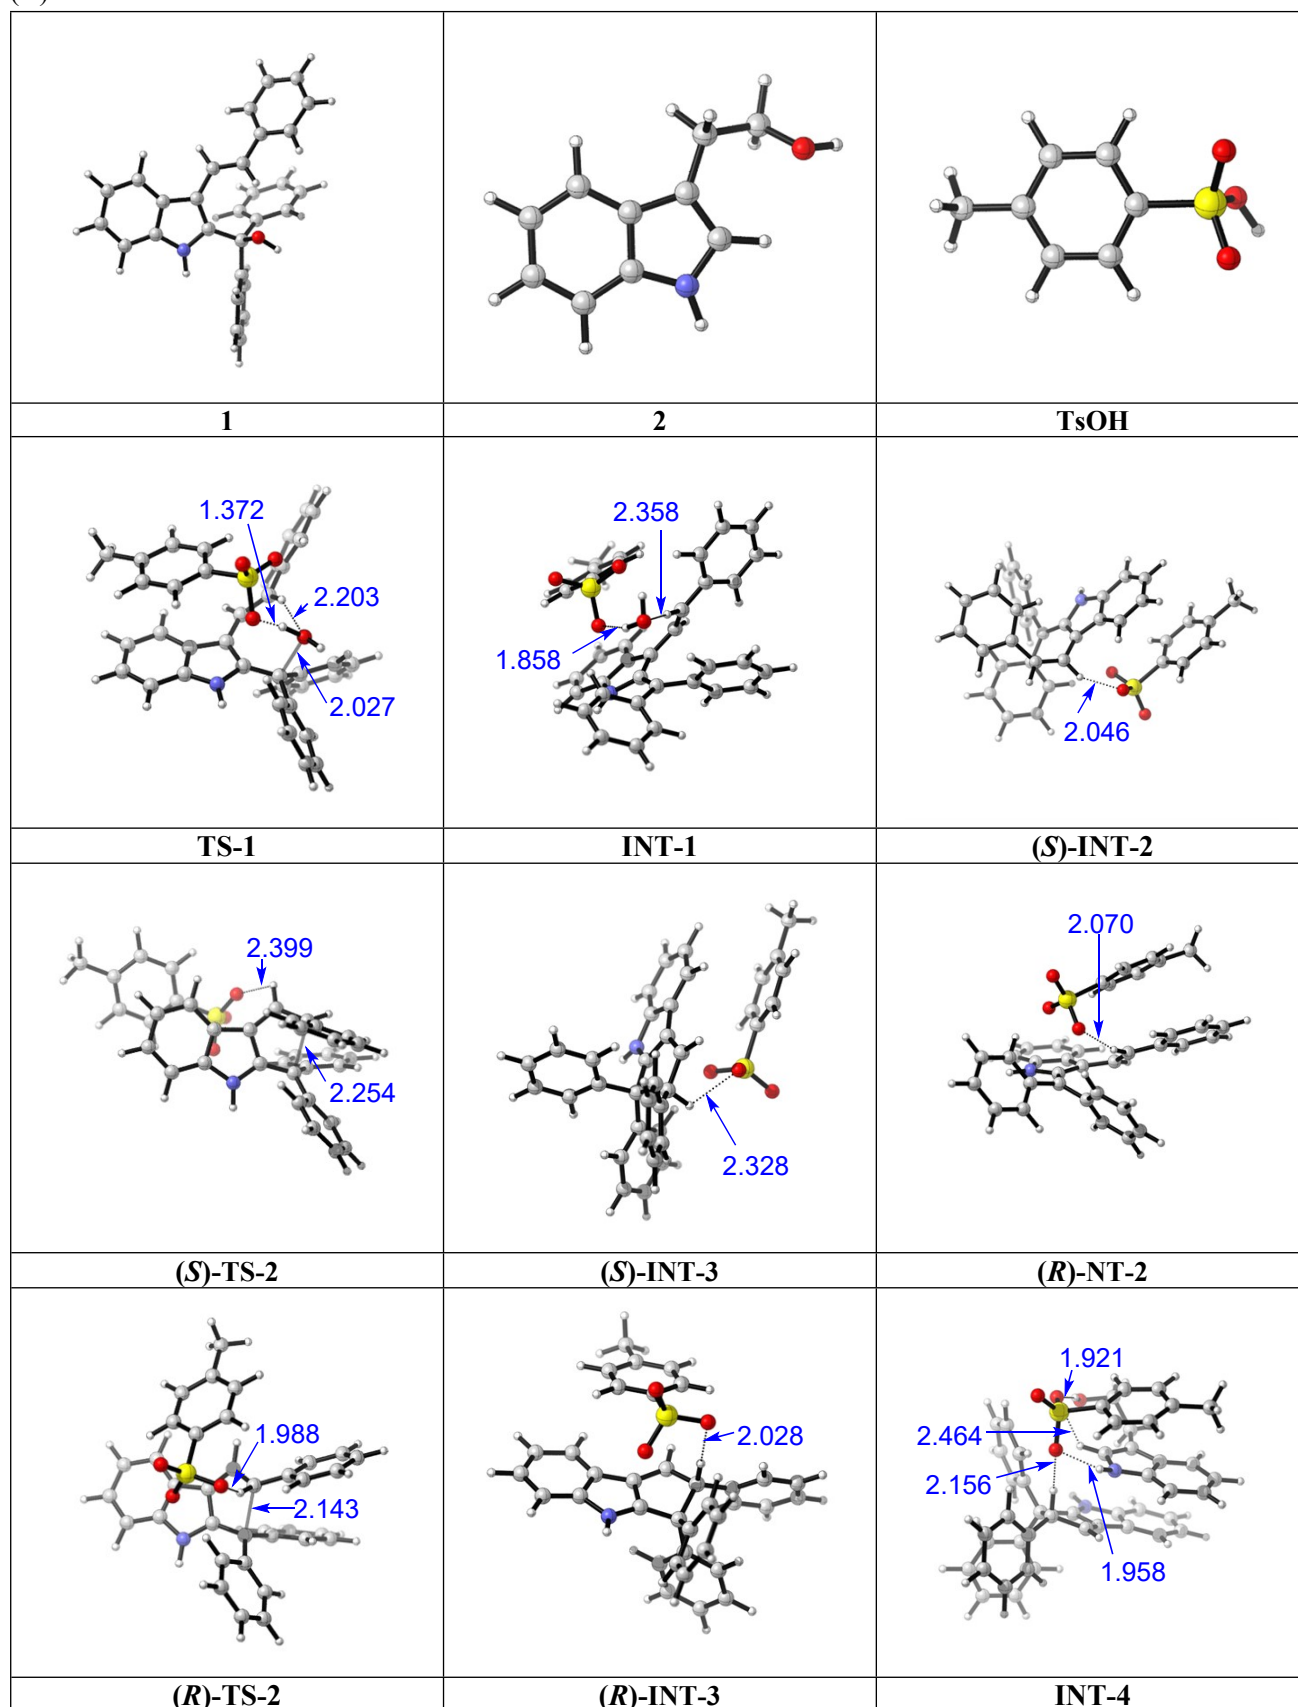

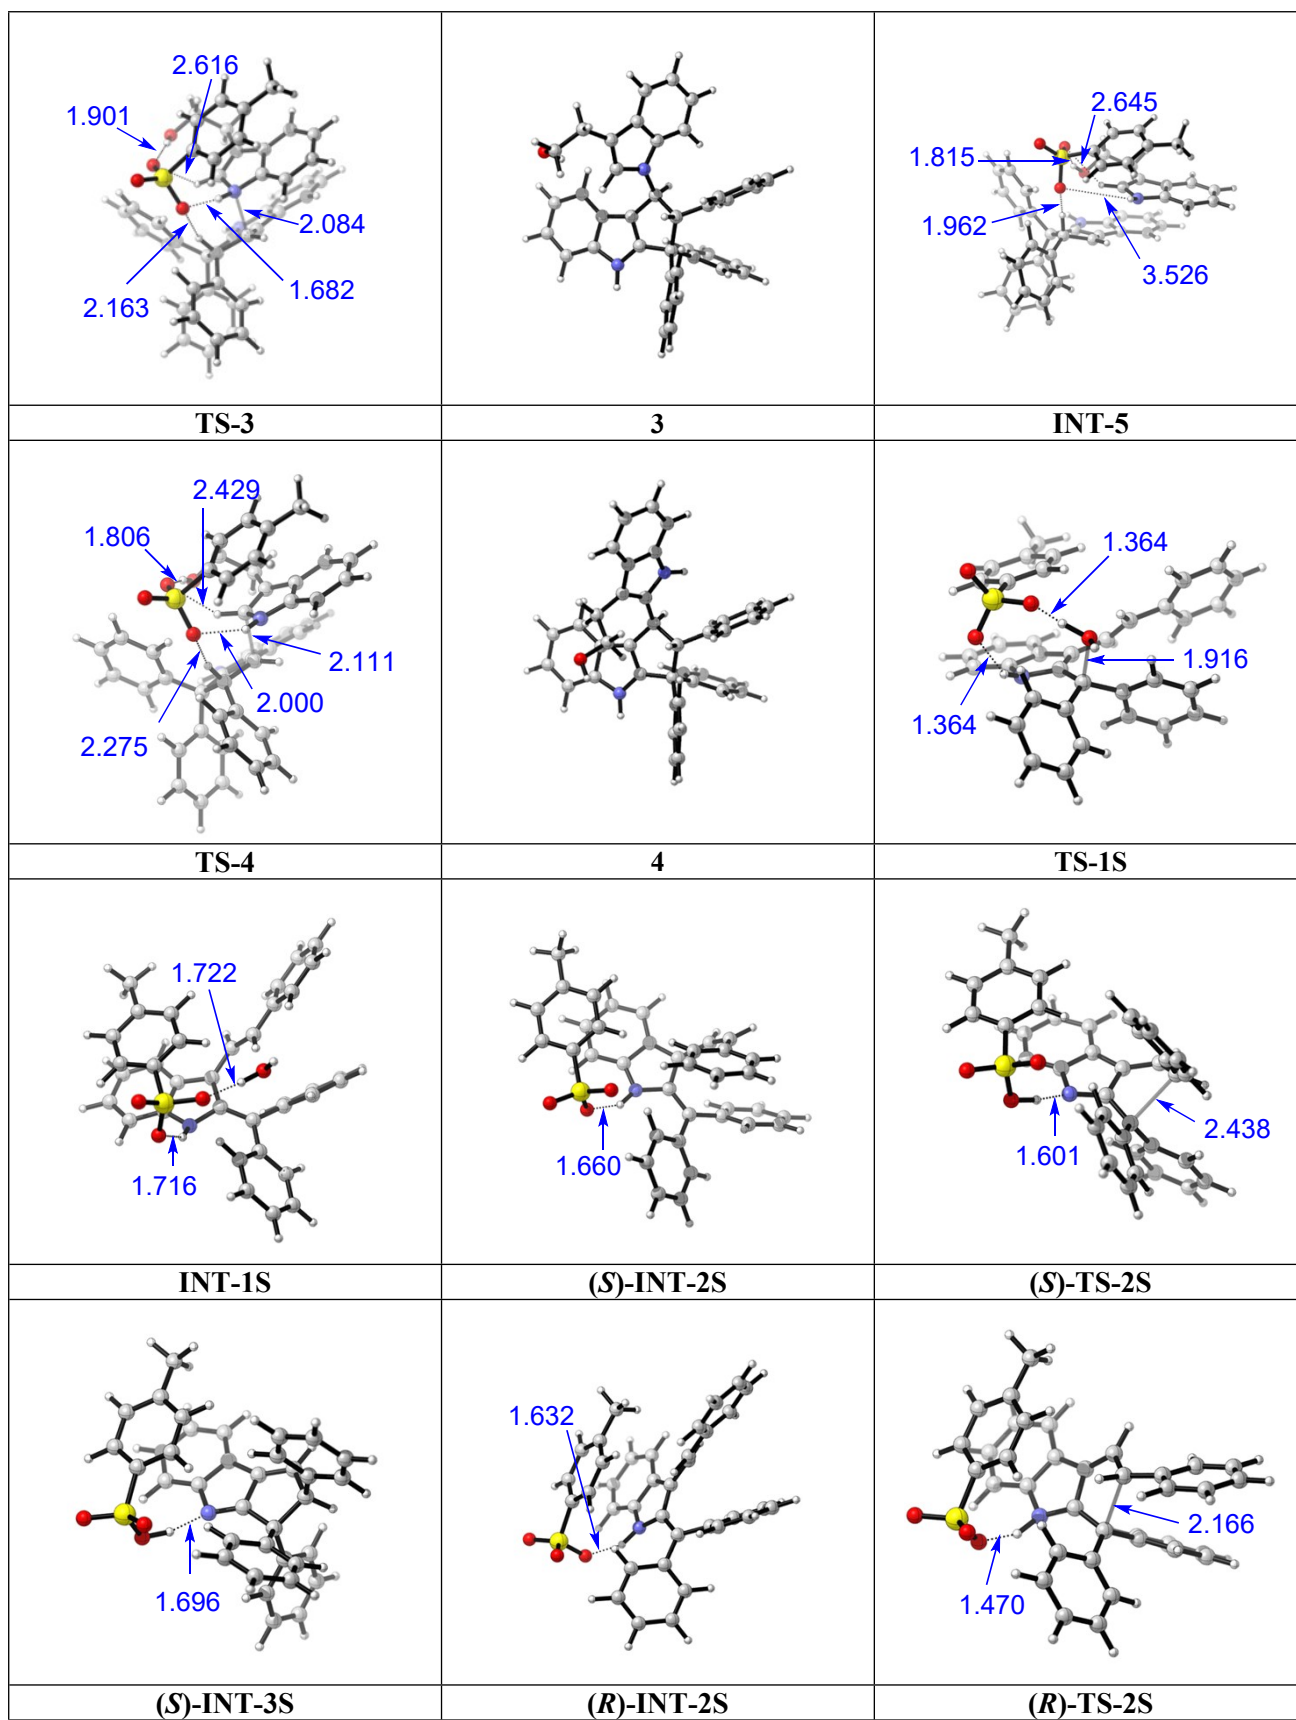

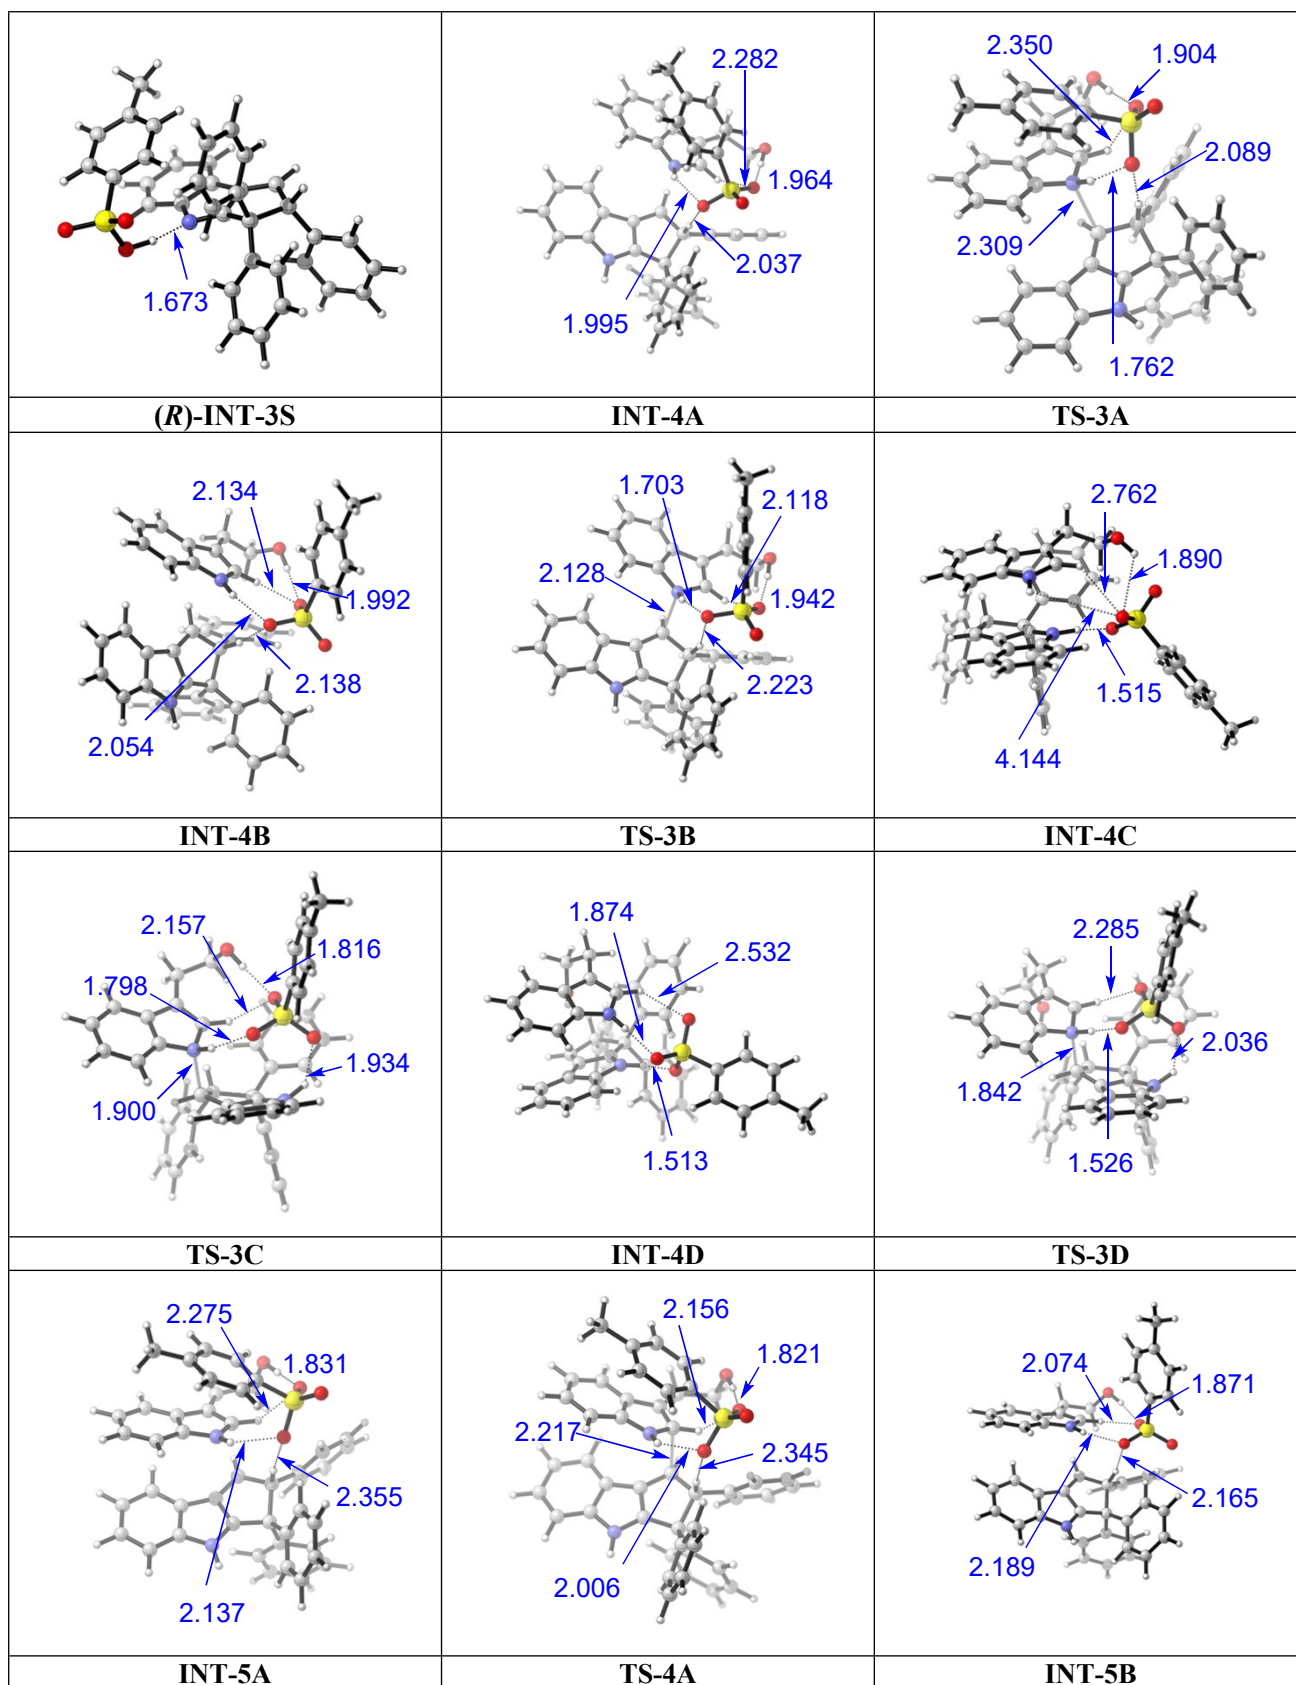

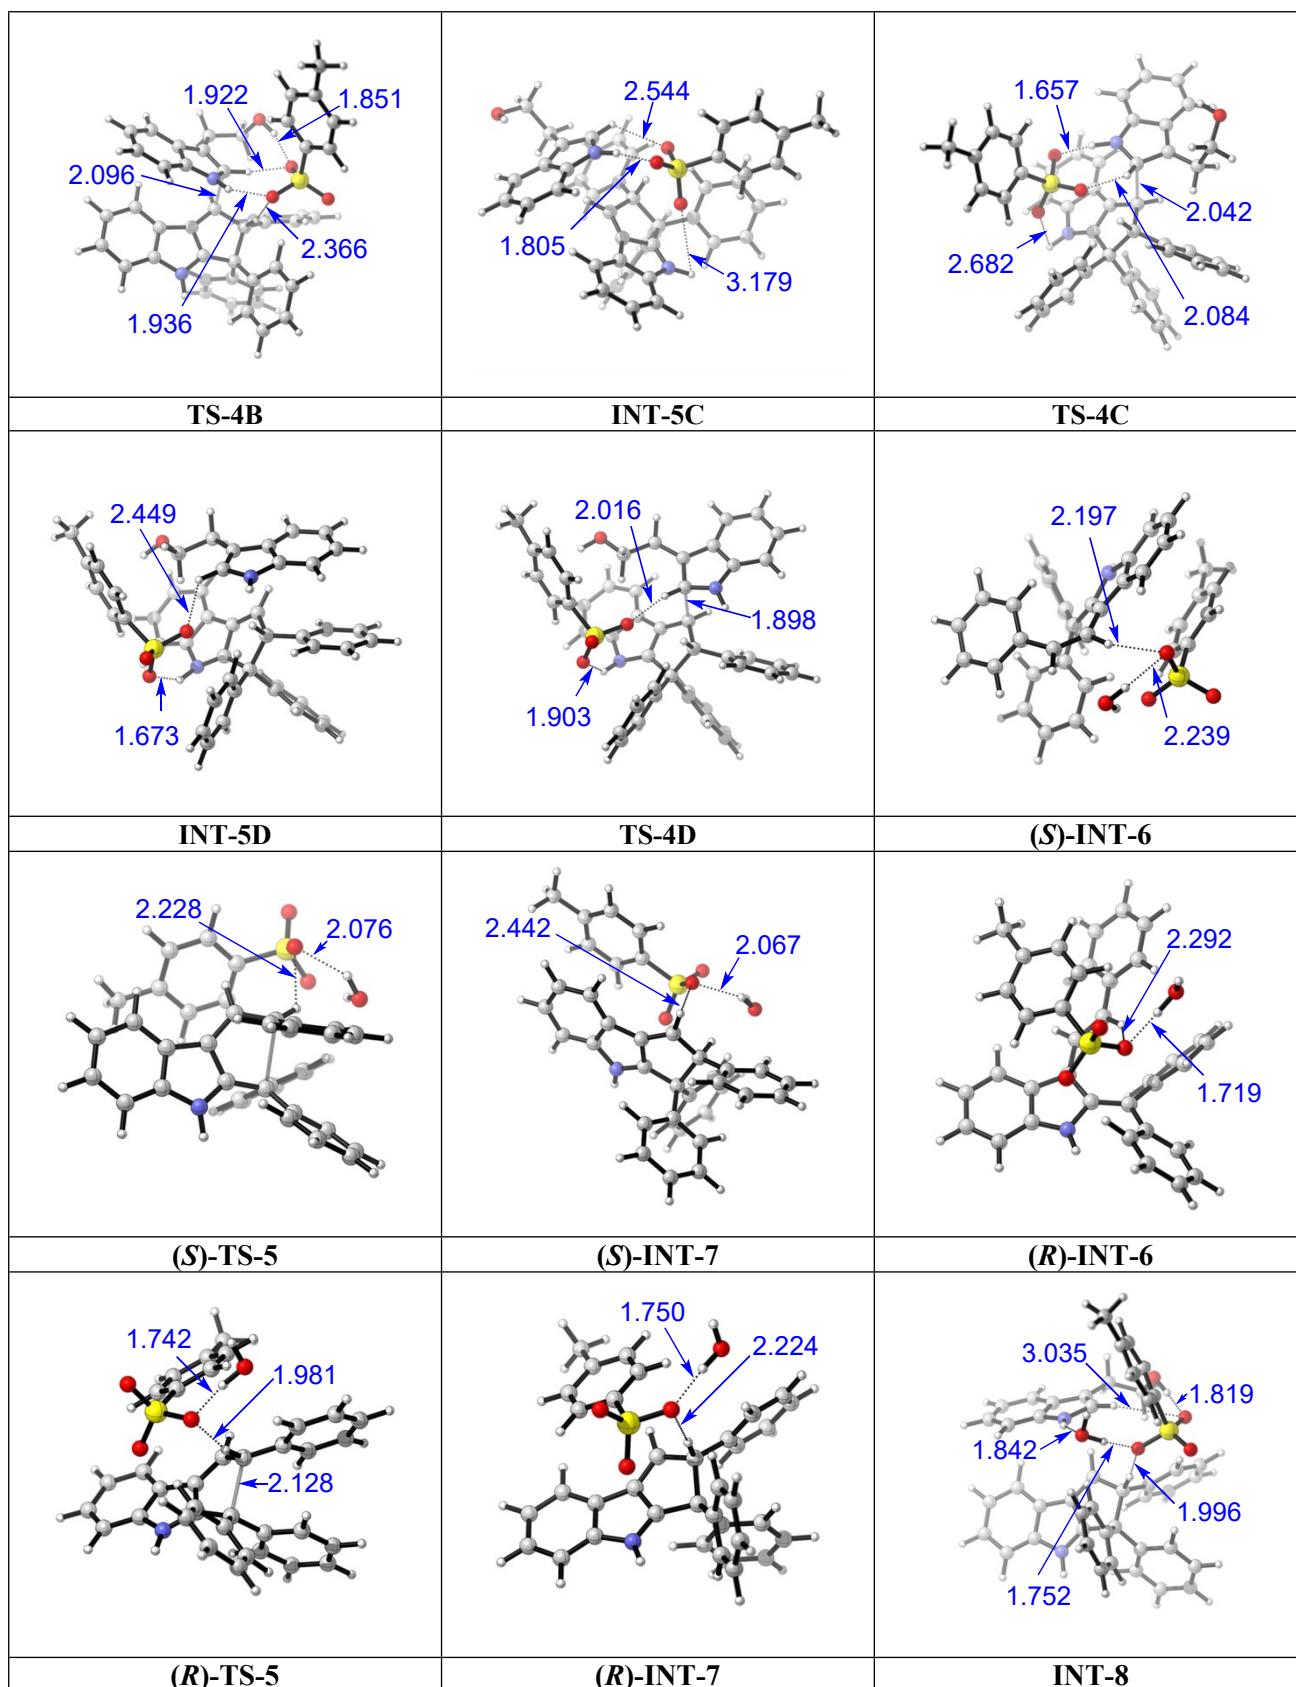



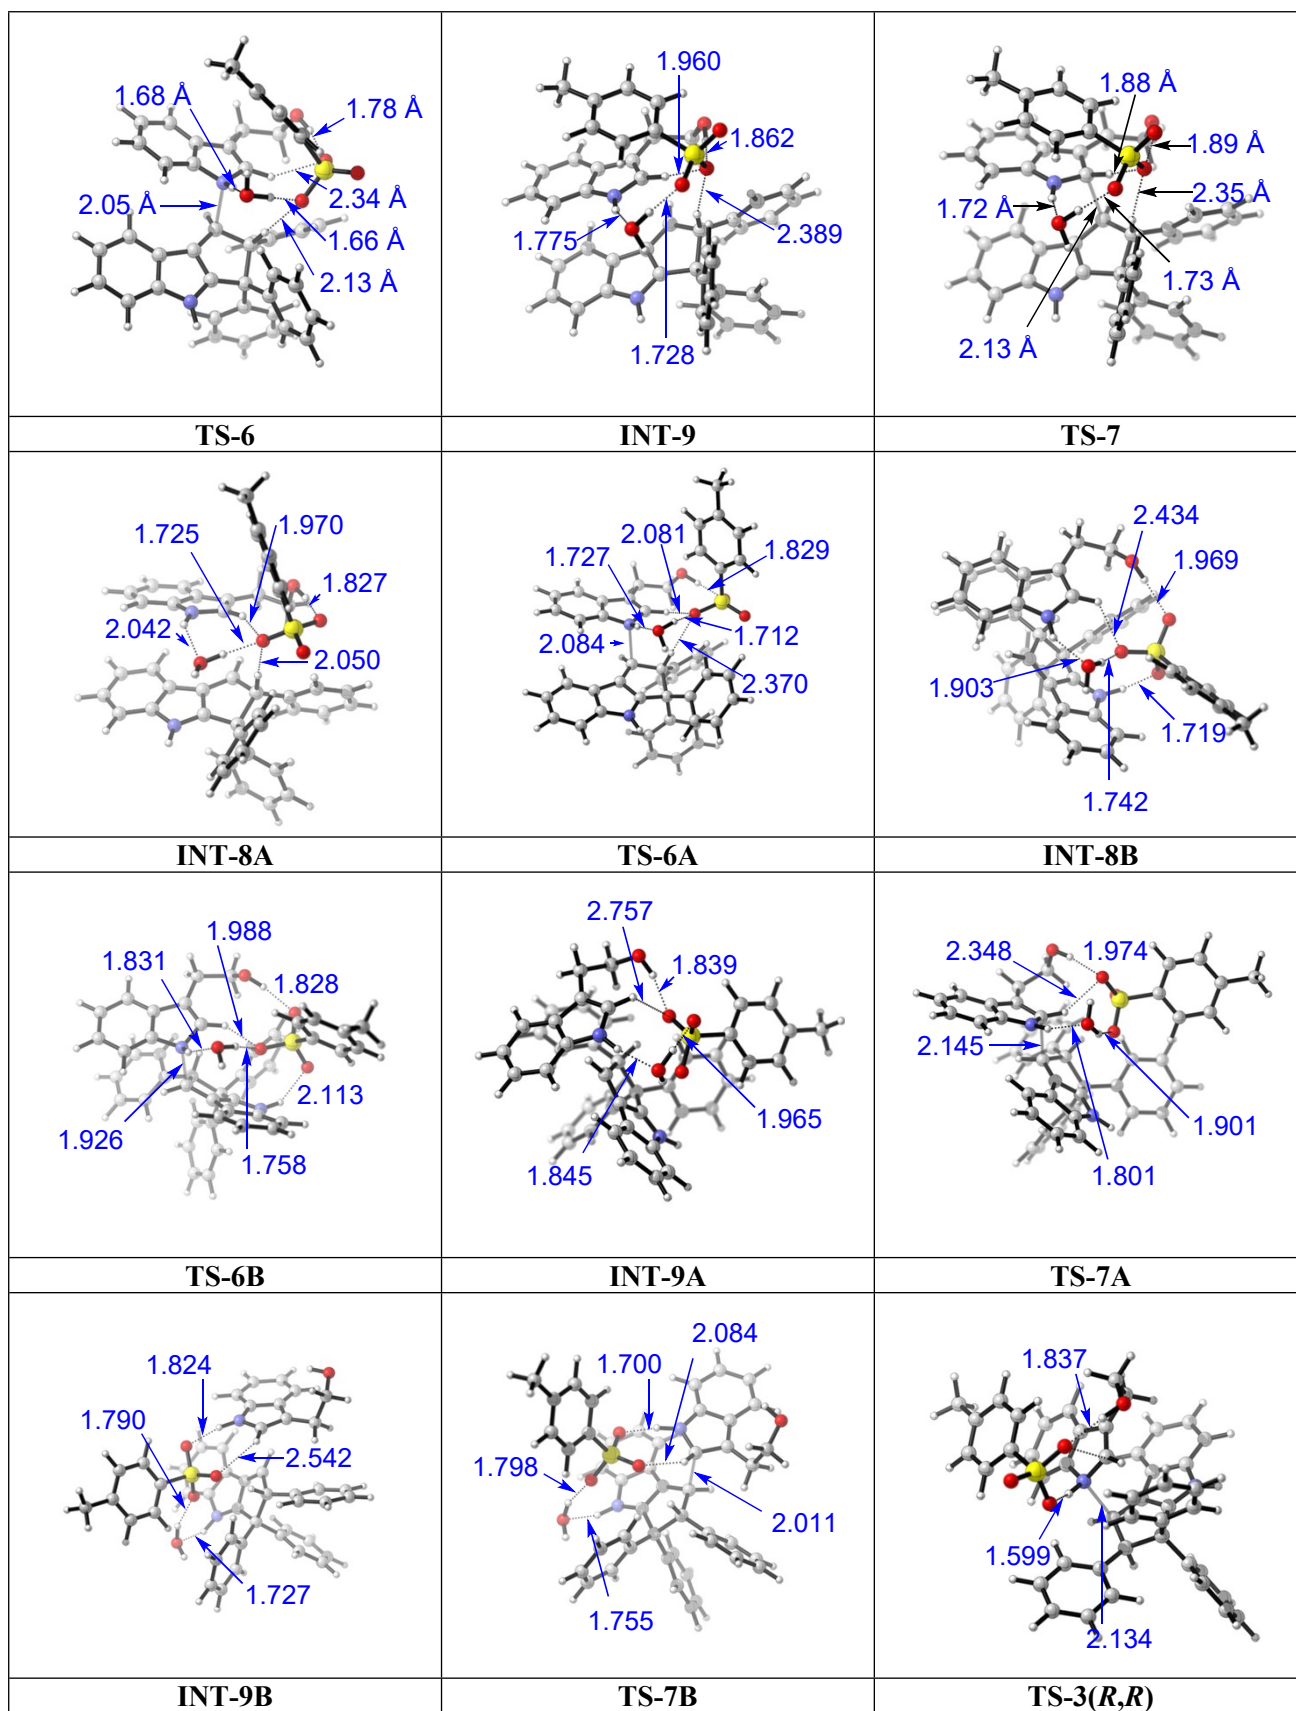

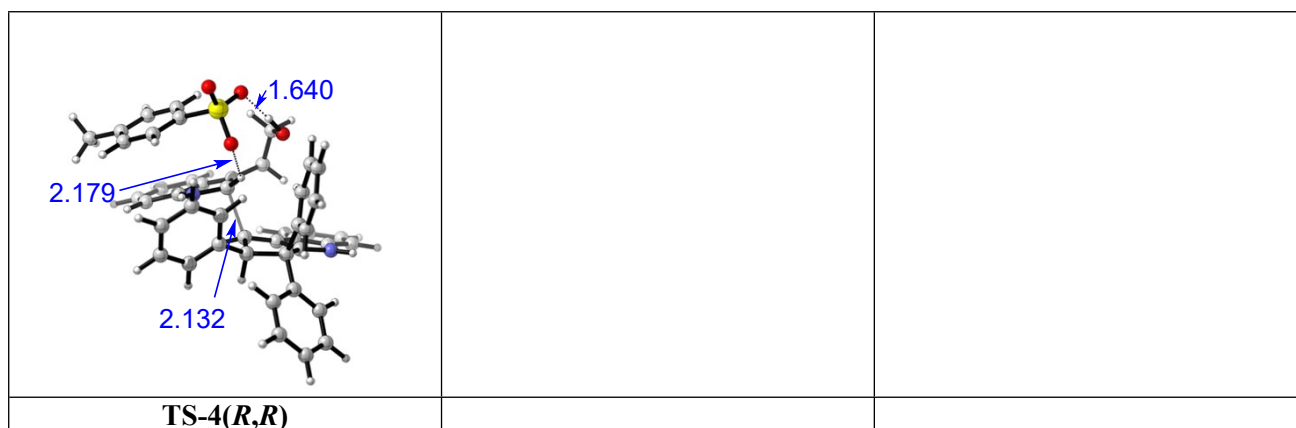

## 5. Cartesian coordinates of DFT-computed structures

### 1

|   |             |             |             |
|---|-------------|-------------|-------------|
| C | 0.98614300  | 2.75266900  | 0.07773500  |
| C | 2.36089500  | 2.40376200  | 0.03318800  |
| C | 3.37934900  | 3.34169900  | 0.22606000  |
| C | 2.99831600  | 4.65556500  | 0.46929500  |
| C | 1.63845100  | 5.02625500  | 0.51357100  |
| C | 0.63216900  | 4.09012000  | 0.31509100  |
| C | 0.22166100  | 1.54754100  | -0.16149500 |
| C | 1.14900100  | 0.52231200  | -0.32896400 |
| H | 4.42596900  | 3.05519200  | 0.18712300  |
| H | 3.76185900  | 5.41132800  | 0.62503500  |
| H | 1.37820000  | 6.06343100  | 0.70058300  |
| H | -0.41173900 | 4.38773700  | 0.33636700  |
| H | 3.26510000  | 0.49932300  | -0.27548700 |
| N | 2.42467600  | 1.05165100  | -0.21859700 |
| C | 0.94723100  | -0.96927600 | -0.53312300 |
| C | -0.08039200 | -1.50708600 | 0.47460100  |
| C | -1.05074300 | -2.43121500 | 0.08620900  |
| C | -0.05199500 | -1.08005800 | 1.80675400  |
| C | -1.98594900 | -2.91033500 | 1.00321300  |
| H | -1.11353700 | -2.74665000 | -0.94884500 |
| C | -0.98036600 | -1.56156500 | 2.72690700  |
| H | 0.68085500  | -0.34166000 | 2.11456100  |
| C | -1.95461300 | -2.47728300 | 2.32717400  |
| H | -2.74959200 | -3.60854900 | 0.67516500  |
| H | -0.95104000 | -1.20952600 | 3.75360200  |
| H | -2.68870600 | -2.84105800 | 3.03917600  |
| C | 2.29149900  | -1.71853600 | -0.42233500 |
| C | 3.16846000  | -1.66955000 | -1.51860800 |
| C | 2.68653900  | -2.41808100 | 0.72227200  |
| C | 4.41059600  | -2.30039300 | -1.46676100 |
| H | 2.86296800  | -1.13244300 | -2.40988100 |
| C | 3.92877100  | -3.05232300 | 0.77117900  |
| H | 2.02051700  | -2.47703600 | 1.57402500  |
| C | 4.79553800  | -2.99520800 | -0.31931300 |
| H | 5.07489200  | -2.25094600 | -2.32419900 |
| H | 4.21561500  | -3.59579900 | 1.66620600  |
| H | 5.76080600  | -3.49011700 | -0.27766800 |
| O | 0.47090500  | -1.12083100 | -1.88682300 |
| H | 0.56081400  | -2.05722000 | -2.11533800 |
| C | -1.22808100 | 1.48665900  | -0.13758700 |
| H | -1.70274600 | 2.22854800  | 0.50310700  |
| C | -1.99918900 | 0.60821900  | -0.80841600 |

|   |             |             |             |
|---|-------------|-------------|-------------|
| H | -1.51627900 | -0.06070800 | -1.51297800 |
| C | -3.44589200 | 0.44899400  | -0.67718000 |
| C | -4.19934400 | 1.04497300  | 0.35163400  |
| C | -4.12559200 | -0.36452700 | -1.60148200 |
| C | -5.57437800 | 0.85487100  | 0.43265700  |
| H | -3.69782200 | 1.64410500  | 1.10457400  |
| C | -5.50176400 | -0.55923700 | -1.51870500 |
| H | -3.55685500 | -0.84160000 | -2.39506800 |
| C | -6.23532100 | 0.05312500  | -0.50217600 |
| H | -6.13467400 | 1.32427900  | 1.23616100  |
| H | -6.00245200 | -1.18984300 | -2.24770700 |
| H | -7.30811500 | -0.09825200 | -0.43212800 |

### 2

|   |             |             |             |
|---|-------------|-------------|-------------|
| C | -0.62148400 | -0.34263800 | -0.08218900 |
| C | -1.28731700 | 0.91230800  | 0.01065200  |
| C | -2.67755800 | 1.01445700  | 0.10871200  |
| C | -3.41019500 | -0.16696700 | 0.11151500  |
| C | -2.77333700 | -1.42079500 | 0.01964400  |
| C | -1.39114900 | -1.51736000 | -0.07759900 |
| C | 0.79380400  | -0.07406100 | -0.16075500 |
| C | 0.93319500  | 1.29186300  | -0.12075000 |
| H | -3.16863200 | 1.98068700  | 0.17915300  |
| H | -4.49239200 | -0.12240800 | 0.18540600  |
| H | -3.37655000 | -2.32347100 | 0.02334000  |
| H | -0.91207500 | -2.48943600 | -0.15244700 |
| H | -0.47916000 | 2.87862400  | 0.03297100  |
| N | -0.31285600 | 1.88766000  | -0.01454800 |
| H | 1.83703500  | 1.87867500  | -0.16166500 |
| C | 1.88060400  | -1.10460400 | -0.27410200 |
| H | 1.51079600  | -2.05936800 | 0.11866700  |
| H | 2.14391000  | -1.28682900 | -1.32498200 |
| C | 3.16000000  | -0.76087900 | 0.47853000  |
| H | 3.83675800  | -1.62929400 | 0.46488100  |
| H | 2.91578700  | -0.53694800 | 1.52781000  |
| O | 3.77392500  | 0.36186700  | -0.15537400 |
| H | 4.54373700  | 0.61326700  | 0.36975300  |

### TsOH

|   |             |             |             |
|---|-------------|-------------|-------------|
| C | -1.94433400 | 1.20939000  | -0.03313400 |
| C | -0.55347700 | 1.21219300  | -0.08694400 |
| C | 0.12138700  | -0.00751100 | -0.07913400 |

|   |             |             |             |
|---|-------------|-------------|-------------|
| C | -0.56556800 | -1.22021900 | -0.02507200 |
| C | -1.95526700 | -1.20073700 | 0.03161800  |
| C | -2.66418500 | 0.00885900  | 0.02764400  |
| H | -2.48071600 | 2.15362600  | -0.04200800 |
| H | 0.00573200  | 2.13864300  | -0.14778200 |
| H | -0.01569500 | -2.15406300 | -0.03701900 |
| H | -2.50057500 | -2.13892000 | 0.07555500  |
| C | -4.17115200 | 0.01436800  | 0.05380100  |
| H | -4.56041400 | 0.94622000  | 0.47201900  |
| H | -4.57715500 | -0.08615000 | -0.95987900 |
| H | -4.56266900 | -0.81790600 | 0.64519900  |
| S | 1.89739100  | -0.01760200 | -0.13145800 |
| O | 2.27409800  | -0.08211900 | 1.47233100  |
| H | 2.78252500  | 0.72499600  | 1.65912600  |
| O | 2.34063600  | -1.27059400 | -0.72446300 |
| O | 2.37855300  | 1.27985600  | -0.60968700 |

**H<sub>2</sub>O**

|   |            |             |             |
|---|------------|-------------|-------------|
| O | 0.00000000 | 0.00000000  | 0.11920900  |
| H | 0.00000000 | 0.75932100  | -0.47683700 |
| H | 0.00000000 | -0.75932100 | -0.47683700 |

**TS-1**

|   |             |             |             |
|---|-------------|-------------|-------------|
| C | -4.18085200 | -0.00766900 | -0.03569600 |
| C | -3.19799500 | 0.21960500  | 0.92811000  |
| C | -2.53539000 | -0.86403900 | 1.49489000  |
| C | -2.84151000 | -2.16854800 | 1.10185400  |
| C | -3.82467600 | -2.38110800 | 0.14373200  |
| C | -4.51419300 | -1.30544000 | -0.43437800 |
| H | -4.69826400 | 0.83824700  | -0.48115200 |
| H | -2.93780100 | 1.22274500  | 1.24315700  |
| H | -2.31066900 | -3.00263800 | 1.54720400  |
| H | -4.05592500 | -3.39406800 | -0.17319500 |
| C | -5.59993900 | -1.55040900 | -1.45118000 |
| H | -6.56308400 | -1.74336700 | -0.96325500 |
| H | -5.73559100 | -0.68644400 | -2.10856700 |
| H | -5.37081800 | -2.42068800 | -2.07309600 |
| S | -1.29809300 | -0.59490000 | 2.76391600  |
| O | -0.03467800 | -1.22890300 | 2.15108900  |
| H | 0.93657500  | -0.28080300 | 1.95361000  |
| O | -1.12967100 | 0.87141400  | 2.88211800  |
| O | -1.73834600 | -1.32769500 | 3.95847100  |

|   |             |             |             |
|---|-------------|-------------|-------------|
| C | -0.86257100 | -1.30667100 | -1.84734400 |
| C | -0.23316500 | -2.54609200 | -1.53806000 |
| C | -0.74746700 | -3.77053500 | -1.98870900 |
| C | -1.89318100 | -3.72707500 | -2.76582500 |
| C | -2.53007600 | -2.50508900 | -3.08935100 |
| C | -2.03776500 | -1.30120100 | -2.62218600 |
| C | -0.08665300 | -0.26478100 | -1.24614900 |
| C | 1.03781600  | -0.89180600 | -0.64982500 |
| H | -0.26488100 | -4.71046500 | -1.74233900 |
| H | -2.31616200 | -4.65569400 | -3.13637000 |
| H | -3.42697700 | -2.52171700 | -3.69883700 |
| H | -2.54688000 | -0.36929700 | -2.83981200 |
| H | 1.56577800  | -2.95124900 | -0.50367100 |
| N | 0.88122000  | -2.27577900 | -0.80143200 |
| C | 2.24096500  | -0.32542300 | -0.13014700 |
| C | 2.71382800  | 0.95844600  | -0.74067200 |
| C | 3.32597000  | 1.97174400  | 0.00743800  |
| C | 2.64046300  | 1.09773900  | -2.13542200 |
| C | 3.81460900  | 3.11389800  | -0.62025800 |
| H | 3.37061100  | 1.88540300  | 1.08364100  |
| C | 3.14156400  | 2.23640600  | -2.76189200 |
| H | 2.18726300  | 0.31035900  | -2.72580000 |
| C | 3.72366400  | 3.25265600  | -2.00592200 |
| H | 4.25957000  | 3.90248200  | -0.02197100 |
| H | 3.07151900  | 2.32816600  | -3.84117900 |
| H | 4.10371400  | 4.14604400  | -2.49125100 |
| C | 3.29722100  | -1.27752300 | 0.33590000  |
| C | 2.99698600  | -2.28003900 | 1.28212500  |
| C | 4.59562300  | -1.19896700 | -0.18612200 |
| C | 3.97875700  | -3.18399900 | 1.67644300  |
| H | 2.00437800  | -2.32353900 | 1.72299200  |
| C | 5.57131900  | -2.11292000 | 0.21111600  |
| H | 4.83386900  | -0.42870100 | -0.90983800 |
| C | 5.26725200  | -3.10634300 | 1.14025800  |
| H | 3.73944800  | -3.94303000 | 2.41436000  |
| H | 6.57095100  | -2.04374100 | -0.20585700 |
| H | 6.03007700  | -3.81238600 | 1.45275300  |
| O | 1.75933800  | 0.36672400  | 1.71291000  |
| H | 2.46772000  | 0.10347200  | 2.31842700  |
| C | -0.49575200 | 1.11796600  | -1.19866000 |
| H | -1.09522400 | 1.46444700  | -2.03738400 |
| C | -0.32416700 | 1.92218000  | -0.12719300 |
| H | 0.14071800  | 1.52213100  | 0.76466000  |
| C | -0.81785300 | 3.28873300  | -0.01002900 |

|   |             |            |             |   |            |             |             |
|---|-------------|------------|-------------|---|------------|-------------|-------------|
| C | -1.03748900 | 4.11772300 | -1.12454500 | H | 1.04354700 | -3.32189500 | -0.86544800 |
| C | -1.09452500 | 3.78826300 | 1.27666600  | N | 0.46520000 | -2.53219100 | -1.10165200 |
| C | -1.53355500 | 5.40630500 | -0.95844300 | C | 2.20580800 | -0.86139900 | -0.68398900 |
| H | -0.78912100 | 3.75496500 | -2.11739900 | C | 2.78854900 | 0.40783500  | -1.14742500 |
| C | -1.59880700 | 5.07632000 | 1.43618300  | C | 3.53853300 | 1.20810600  | -0.26810100 |
| H | -0.94132300 | 3.13592900 | 2.13120700  | C | 2.60864600 | 0.82009400  | -2.47901700 |
| C | -1.81908100 | 5.88876000 | 0.32223500  | C | 4.05544800 | 2.42125200  | -0.71165500 |
| H | -1.69063400 | 6.04120700 | -1.82543800 | H | 3.61059300 | 0.90910400  | 0.77174300  |
| H | -1.82138100 | 5.44693800 | 2.43211700  | C | 3.14537600 | 2.02488200  | -2.91831200 |
| H | -2.20590400 | 6.89540200 | 0.44931000  | H | 2.05111300 | 0.18586700  | -3.15970200 |

### INT-1

|   |             |             |             |   |             |             |             |
|---|-------------|-------------|-------------|---|-------------|-------------|-------------|
| C | -4.11811600 | 0.98995600  | 0.20060100  | H | 3.00845300  | 2.33352800  | -3.94992600 |
| C | -2.97991600 | 0.87003700  | 0.99924100  | H | 4.27060700  | 3.77963600  | -2.37155700 |
| C | -2.61515000 | -0.37970100 | 1.49149500  | C | 3.06763200  | -1.80705700 | 0.02521400  |
| C | -3.38999100 | -1.50404000 | 1.20085300  | C | 2.54723000  | -2.65608900 | 1.02897600  |
| C | -4.52561700 | -1.37136600 | 0.40950800  | C | 4.44540500  | -1.86075900 | -0.27142800 |
| C | -4.90465000 | -0.12481700 | -0.10801700 | C | 3.38944300  | -3.53788100 | 1.69652500  |
| H | -4.40642700 | 1.96834800  | -0.17623000 | H | 1.50671600  | -2.55538800 | 1.32596600  |
| H | -2.38421600 | 1.73540000  | 1.26135100  | C | 5.27306800  | -2.75874600 | 0.39035900  |
| H | -3.10867300 | -2.46584200 | 1.61520400  | H | 4.84860600  | -1.20716900 | -1.03619300 |
| H | -5.12998300 | -2.24674100 | 0.18653400  | C | 4.74756900  | -3.59923300 | 1.37544100  |
| C | -6.11263600 | 0.00103200  | -1.00207500 | H | 2.98729900  | -4.16296000 | 2.48701800  |
| H | -6.90766200 | -0.68794400 | -0.70147800 | H | 6.32887900  | -2.80240700 | 0.14328200  |
| H | -6.51913100 | 1.01617500  | -0.98725300 | H | 5.39897400  | -4.29044200 | 1.90126200  |
| H | -5.86107300 | -0.23361000 | -2.04506200 | O | 2.06016000  | 0.31205900  | 2.30314000  |
| S | -1.14215400 | -0.57585800 | 2.50555800  | H | 1.44429600  | 0.85338900  | 2.82213800  |
| O | -0.15033000 | -1.23332400 | 1.56990600  | C | -0.36193300 | 1.03935700  | -1.24212700 |
| H | 1.44298600  | -0.39762900 | 2.03542500  | H | -1.05253500 | 1.54218500  | -1.91389700 |
| O | -0.71281500 | 0.81086500  | 2.85800900  | C | 0.14888900  | 1.71157800  | -0.18068600 |
| O | -1.53162300 | -1.43799200 | 3.63491300  | H | 0.68138200  | 1.16097300  | 0.58845800  |
| C | -1.24068700 | -1.25191100 | -1.84894900 | C | -0.03463500 | 3.13396600  | 0.05553300  |
| C | -0.79461600 | -2.58807300 | -1.61296100 | C | -0.19360800 | 4.05118500  | -1.00046000 |
| C | -1.60478800 | -3.69422300 | -1.90296200 | C | -0.04923600 | 3.60789400  | 1.38155700  |
| C | -2.86076100 | -3.43570100 | -2.42635900 | C | -0.36798900 | 5.40471200  | -0.73762500 |
| C | -3.32465000 | -2.11698000 | -2.66012900 | H | -0.14007400 | 3.69725500  | -2.02533500 |
| C | -2.53425500 | -1.02684400 | -2.36273200 | C | -0.23660200 | 4.96284100  | 1.63836300  |
| C | -0.20933600 | -0.37267400 | -1.42057200 | H | 0.03239800  | 2.88901400  | 2.18968800  |
| C | 0.89969200  | -1.20503600 | -1.01659800 | C | -0.39331500 | 5.86392400  | 0.58311000  |
| H | -1.26570600 | -4.70736200 | -1.71690500 | H | -0.47625600 | 6.10656000  | -1.55902700 |
| H | -3.51625400 | -4.26985800 | -2.65658700 | H | -0.26304000 | 5.31679100  | 2.66416900  |
| H | -4.32333200 | -1.97170200 | -3.05639600 | H | -0.53131000 | 6.92156800  | 0.78644500  |
| H | -2.90214700 | -0.01658800 | -2.49669500 |   |             |             |             |

**(S)-INT-2**

|   |             |             |             |
|---|-------------|-------------|-------------|
| C | -1.15649700 | -0.62817900 | 1.11926300  |
| C | -1.05490900 | -1.86480900 | 0.41477400  |
| C | -2.04416000 | -2.84604300 | 0.51438700  |
| C | -3.12914200 | -2.56349100 | 1.33384500  |
| C | -3.24234600 | -1.34875100 | 2.05032500  |
| C | -2.26852800 | -0.37633100 | 1.95263600  |
| C | -0.02820200 | 0.15874500  | 0.78719600  |
| C | 0.75996400  | -0.61319100 | -0.14585500 |
| H | -1.97615400 | -3.77993500 | -0.03289900 |
| H | -3.92405700 | -3.29710800 | 1.42214900  |
| H | -4.12847900 | -1.17017400 | 2.64711500  |
| H | -2.36737500 | 0.58672900  | 2.43693800  |
| H | 0.34450800  | -2.49954600 | -1.03224900 |
| N | 0.12140700  | -1.86085400 | -0.28519600 |
| C | 1.94011400  | -0.31447600 | -0.80646400 |
| C | 2.42693600  | 1.05032700  | -0.99484700 |
| C | 3.81080400  | 1.30998900  | -0.91493800 |
| C | 1.53851400  | 2.10391700  | -1.28852800 |
| C | 4.29113000  | 2.60262900  | -1.08602800 |
| H | 4.49188300  | 0.50204200  | -0.67449800 |
| C | 2.03307000  | 3.38888300  | -1.47668800 |
| H | 0.47284000  | 1.90659100  | -1.38163500 |
| C | 3.40281500  | 3.64454400  | -1.36667200 |
| H | 5.35496500  | 2.79932800  | -0.99837500 |
| H | 1.34218200  | 4.19205800  | -1.71124100 |
| H | 3.77989500  | 4.65302100  | -1.50840100 |
| C | 2.74079000  | -1.40764000 | -1.39022500 |
| C | 2.98705900  | -2.59037900 | -0.66653100 |
| C | 3.30634200  | -1.26303700 | -2.67061500 |
| C | 3.77242100  | -3.59968600 | -1.21463600 |
| H | 2.59367500  | -2.68592000 | 0.33834900  |
| C | 4.07318400  | -2.28457000 | -3.22189600 |
| H | 3.12228800  | -0.35181600 | -3.22838300 |
| C | 4.30997500  | -3.45354300 | -2.49545400 |
| H | 3.97361900  | -4.49757700 | -0.63898000 |
| H | 4.48899700  | -2.16833000 | -4.21749700 |
| H | 4.91699900  | -4.24525100 | -2.92318200 |
| C | 0.29849800  | 1.42275900  | 1.43057900  |
| H | -0.50898300 | 2.15538700  | 1.36128600  |
| C | 1.43034800  | 1.70871500  | 2.09870300  |
| H | 1.53769800  | 2.72486800  | 2.47219700  |
| C | 2.56218700  | 0.81023400  | 2.36417200  |
| C | 2.38900000  | -0.55923400 | 2.63169100  |

|   |             |             |             |
|---|-------------|-------------|-------------|
| C | 3.86782900  | 1.32655500  | 2.35693200  |
| C | 3.48742600  | -1.38933000 | 2.83483900  |
| H | 1.38522300  | -0.96460100 | 2.69721300  |
| C | 4.96819900  | 0.49478600  | 2.55448800  |
| H | 4.01441200  | 2.38428000  | 2.16156800  |
| C | 4.78322800  | -0.86856200 | 2.78487700  |
| H | 3.33320500  | -2.44269900 | 3.05031400  |
| H | 5.97036400  | 0.91192800  | 2.52973000  |
| H | 5.63890100  | -1.51750600 | 2.94330300  |
| C | -4.85341800 | -1.23531700 | -1.24948100 |
| C | -3.84213100 | -0.28083700 | -1.34299400 |
| C | -3.91259700 | 0.87588000  | -0.57157300 |
| C | -4.99930700 | 1.08615900  | 0.27991000  |
| C | -6.00392700 | 0.12810800  | 0.36472000  |
| C | -5.94631600 | -1.04913800 | -0.39585800 |
| H | -4.78888600 | -2.14603500 | -1.83986400 |
| H | -2.98066200 | -0.43074500 | -1.98311100 |
| H | -5.02745900 | 1.98245400  | 0.88959600  |
| H | -6.84390800 | 0.28740200  | 1.03655200  |
| C | -7.04770000 | -2.07651400 | -0.30964600 |
| H | -6.69952100 | -3.06403500 | -0.62673900 |
| H | -7.43643900 | -2.16329000 | 0.70995400  |
| H | -7.89314800 | -1.80671100 | -0.95440700 |
| S | -2.60401200 | 2.10997300  | -0.66006800 |
| O | -2.42432600 | 2.54673700  | 0.75903500  |
| O | -1.42129900 | 1.33641500  | -1.17844900 |
| O | -3.06389400 | 3.16892100  | -1.57730900 |

**(S)-TS-2**

|   |             |             |             |
|---|-------------|-------------|-------------|
| C | 0.97942100  | -1.36072300 | 0.00405700  |
| C | 0.68953600  | -1.56825600 | 1.37319800  |
| C | 1.54457100  | -2.26123000 | 2.21722000  |
| C | 2.72530800  | -2.74990900 | 1.65418500  |
| C | 3.02794800  | -2.55853900 | 0.29800400  |
| C | 2.15578200  | -1.87222500 | -0.54144300 |
| C | -0.13148200 | -0.60638500 | -0.52542300 |
| C | -1.00349400 | -0.30634700 | 0.56933100  |
| H | 1.32055000  | -2.40093000 | 3.26943300  |
| H | 3.43103400  | -3.27902900 | 2.28608300  |
| H | 3.97670800  | -2.90941900 | -0.09149400 |
| H | 2.41170800  | -1.67083200 | -1.57354400 |
| H | -0.86690400 | -0.74412900 | 2.60594400  |
| N | -0.53347900 | -0.92728800 | 1.67040400  |





|                  |             |             |             |   |             |             |             |
|------------------|-------------|-------------|-------------|---|-------------|-------------|-------------|
| C                | -3.33871900 | 3.28931800  | 1.43169400  | C | 1.89829200  | 1.74657400  | 1.32830300  |
| H                | -1.98704200 | 1.71095700  | 1.92453600  | C | 1.49914900  | 0.67867600  | 2.12791500  |
| C                | -4.12416800 | 3.33881000  | -0.84054900 | C | 2.45311500  | -0.15510000 | 2.71421100  |
| H                | -3.43511400 | 1.75685500  | -2.11198900 | C | 3.80362000  | 0.06497000  | 2.46730100  |
| C                | -4.10479600 | 3.89542200  | 0.43733300  | C | 4.22599200  | 1.11154500  | 1.63461800  |
| H                | -3.29472800 | 3.71951700  | 2.42732500  | H | 3.56676800  | 2.78350400  | 0.45363200  |
| H                | -4.70181900 | 3.80656500  | -1.63190600 | H | 1.13928100  | 2.39098200  | 0.90102900  |
| H                | -4.66963600 | 4.79697100  | 0.65242700  | H | 2.12901500  | -0.96539900 | 3.35852500  |
| C                | -0.15314800 | -0.16318400 | 1.35418600  | H | 4.54607200  | -0.59036100 | 2.91517700  |
| H                | 0.23033800  | -0.49095900 | 2.30849000  | C | 5.68715500  | 1.29183500  | 1.31230000  |
| C                | -1.45089500 | -0.67855200 | 0.77638400  | H | 5.99466800  | 0.59149200  | 0.52665900  |
| H                | -1.14386000 | -1.61216400 | 0.29206600  | H | 5.89707600  | 2.30400200  | 0.95500600  |
| C                | -2.56123200 | -1.02450700 | 1.73943800  | H | 6.31796100  | 1.10132900  | 2.18624000  |
| C                | -2.62890000 | -0.50450900 | 3.03730700  | S | -0.24651300 | 0.30404100  | 2.34376100  |
| C                | -3.54275600 | -1.94195200 | 1.33955600  | O | -0.46281400 | 0.09746300  | 3.78797800  |
| C                | -3.66439500 | -0.86038600 | 3.90035000  | O | -0.97293600 | 1.46289600  | 1.74300000  |
| H                | -1.86006000 | 0.17541700  | 3.39119300  | O | -0.44749300 | -0.95572000 | 1.53387100  |
| C                | -4.58702900 | -2.28873600 | 2.19373000  | C | -0.97098500 | 2.56840400  | -1.62004300 |
| H                | -3.47881800 | -2.39253400 | 0.35565700  | C | -2.29061300 | 2.76979500  | -1.12011000 |
| C                | -4.65504600 | -1.74489900 | 3.47689100  | C | -2.89927700 | 4.03405200  | -1.12798600 |
| H                | -3.69406800 | -0.44661300 | 4.90363200  | C | -2.15730700 | 5.08981000  | -1.62678100 |
| H                | -5.33853600 | -2.99854100 | 1.86195300  | C | -0.83682100 | 4.91577800  | -2.11440000 |
| H                | -5.46429400 | -2.02020900 | 4.14596300  | C | -0.23908600 | 3.67163900  | -2.10784400 |
| C                | 5.45911600  | -0.18231800 | -0.49898800 | C | -0.63932300 | 1.19126500  | -1.44381400 |
| C                | 4.24283900  | -0.73629500 | -0.88120800 | C | -1.81134300 | 0.56324500  | -0.87914300 |
| C                | 3.44307100  | -1.36864500 | 0.07120200  | H | -3.90347600 | 4.17771300  | -0.74437100 |
| C                | 3.86210600  | -1.45182800 | 1.39649800  | H | -2.59409200 | 6.08348000  | -1.63840900 |
| C                | 5.08289600  | -0.88861100 | 1.76967800  | H | -0.29351500 | 5.77744700  | -2.48683000 |
| C                | 5.89888800  | -0.24797100 | 0.83085800  | H | 0.77649500  | 3.54317000  | -2.46699900 |
| H                | 6.07362600  | 0.32457800  | -1.23859000 | H | -3.65319300 | 1.41301700  | -0.24829000 |
| H                | 3.88703300  | -0.65407500 | -1.90174700 | N | -2.76303600 | 1.57343900  | -0.69095500 |
| H                | 3.22070100  | -1.93915000 | 2.12216700  | C | -2.10434400 | -0.76479600 | -0.56664000 |
| H                | 5.40655800  | -0.94630000 | 2.80589300  | C | -1.41197200 | -1.88473400 | -1.22181300 |
| C                | 7.22564000  | 0.34895400  | 1.23008700  | C | -1.03750100 | -3.01319800 | -0.47182700 |
| H                | 7.38414800  | 1.32374900  | 0.75681100  | C | -1.15171300 | -1.85543600 | -2.60102000 |
| H                | 7.29536300  | 0.48180500  | 2.31326100  | C | -0.37295000 | -4.06774800 | -1.08932000 |
| H                | 8.05841500  | -0.29545000 | 0.92368900  | H | -1.20819700 | -3.00416000 | 0.59732600  |
| S                | 1.87533900  | -2.08735600 | -0.43585200 | C | -0.50207300 | -2.92032200 | -3.21499800 |
| O                | 1.05824900  | -2.13904300 | 0.83314300  | H | -1.46155200 | -0.99279600 | -3.18044000 |
| O                | 1.32973400  | -1.09411900 | -1.41250100 | C | -0.10251400 | -4.02465300 | -2.45893100 |
| O                | 2.15689100  | -3.41604100 | -1.00090600 | H | -0.05858900 | -4.92283300 | -0.49936900 |
|                  |             |             |             | H | -0.30740100 | -2.89102100 | -4.28235600 |
| <b>(R)-INT-2</b> |             |             |             | H | 0.41500800  | -4.85054600 | -2.93707000 |
| C                | 3.25551600  | 1.95600000  | 1.08629600  | C | -3.26720700 | -1.08903600 | 0.27061800  |

|   |             |             |             |   |             |             |             |
|---|-------------|-------------|-------------|---|-------------|-------------|-------------|
| C | -3.58133500 | -0.32721800 | 1.41691100  | O | -1.66455300 | -1.41470300 | 1.53280700  |
| C | -4.08113100 | -2.18926500 | -0.06334600 | O | -0.57163200 | 0.36637900  | 2.86750800  |
| C | -4.68725500 | -0.66024600 | 2.19047200  | C | -1.79636800 | -1.58910700 | -1.69031600 |
| H | -2.91332400 | 0.47423400  | 1.71873200  | C | -1.42002000 | -2.89957100 | -1.29915200 |
| C | -5.19515200 | -2.50268100 | 0.70797600  | C | -2.24506800 | -4.00000600 | -1.49041100 |
| H | -3.84265200 | -2.78046700 | -0.93995400 | C | -3.48210900 | -3.76869900 | -2.09212100 |
| C | -5.50026900 | -1.74052700 | 1.83736600  | C | -3.87422400 | -2.48020600 | -2.48692100 |
| H | -4.90036400 | -0.08734600 | 3.08704800  | C | -3.04079900 | -1.38195500 | -2.28569000 |
| H | -5.82270400 | -3.34384600 | 0.43113000  | C | -0.71735500 | -0.72677400 | -1.25354500 |
| H | -6.36179700 | -1.99494100 | 2.44713400  | C | 0.31065900  | -1.57328300 | -0.73471900 |
| C | 0.68477500  | 0.68886000  | -1.66523400 | H | -1.94914000 | -4.99428800 | -1.17359000 |
| H | 1.29472600  | 1.28416800  | -2.33993100 | H | -4.15676500 | -4.60335300 | -2.25124800 |
| C | 1.24104600  | -0.33627700 | -0.97537900 | H | -4.84550800 | -2.33848000 | -2.94893600 |
| H | 0.63144300  | -0.83325600 | -0.22898600 | H | -3.35092300 | -0.38427800 | -2.57367100 |
| C | 2.61162400  | -0.80277000 | -1.05213100 | H | 0.36992800  | -3.62238300 | -0.33777500 |
| C | 3.59241200  | -0.24095100 | -1.89216100 | N | -0.13315200 | -2.84165600 | -0.73361200 |
| C | 2.97758500  | -1.86933700 | -0.21042800 | C | 1.57613800  | -1.00185900 | -0.31463000 |
| C | 4.88929100  | -0.73695000 | -1.89362500 | C | 2.44867400  | -0.45871500 | -1.39981300 |
| H | 3.33722700  | 0.58953400  | -2.54222000 | C | 3.52664200  | 0.38759700  | -1.08420000 |
| C | 4.27751500  | -2.36440600 | -0.21167200 | C | 2.21683100  | -0.76896300 | -2.74960700 |
| H | 2.22665500  | -2.28396700 | 0.45375500  | C | 4.34320100  | 0.90312300  | -2.08577400 |
| C | 5.23729400  | -1.80121700 | -1.05327900 | H | 3.70744300  | 0.65542500  | -0.05042100 |
| H | 5.63645200  | -0.29473800 | -2.54556300 | C | 3.02769300  | -0.23959200 | -3.75144200 |
| H | 4.54490900  | -3.18342400 | 0.44857000  | H | 1.40606900  | -1.43752300 | -3.01689400 |
| H | 6.25322800  | -2.18428400 | -1.05561100 | C | 4.09501000  | 0.59715500  | -3.42433700 |

**(R)-TS-2**

|   |             |             |             |   |             |             |             |
|---|-------------|-------------|-------------|---|-------------|-------------|-------------|
| C | -4.04368600 | 1.58280100  | -0.49942400 | H | 5.16408900  | 1.56055700  | -1.81810300 |
| C | -3.54649100 | 0.63740700  | 0.39488400  | H | 2.83271300  | -0.49543800 | -4.78827200 |
| C | -2.57867500 | 1.00983100  | 1.32945400  | H | 4.73047400  | 1.00289200  | -4.20517700 |
| C | -2.12579000 | 2.32808500  | 1.37511800  | C | 2.22471600  | -1.63606100 | 0.86661300  |
| C | -2.62224800 | 3.26470100  | 0.46987500  | C | 1.44238100  | -1.94980200 | 1.99497500  |
| C | -3.58794200 | 2.90916700  | -0.48072700 | C | 3.58928800  | -1.98292300 | 0.86881000  |
| H | -4.79707300 | 1.28969900  | -1.22699900 | C | 2.02211200  | -2.56401000 | 3.10067700  |
| H | -3.87427300 | -0.39491600 | 0.35374400  | H | 0.38804600  | -1.69585600 | 2.01439100  |
| H | -1.36063000 | 2.59341200  | 2.09489900  | C | 4.15801700  | -2.60499200 | 1.97639700  |
| H | -2.25067600 | 4.28587300  | 0.49685800  | H | 4.19982300  | -1.78349900 | -0.00309400 |
| C | -4.14753800 | 3.93303700  | -1.43715200 | C | 3.37906300  | -2.89056400 | 3.09914300  |
| H | -3.41674600 | 4.71682300  | -1.65720500 | H | 1.40582200  | -2.77581700 | 3.96823500  |
| H | -4.45232600 | 3.47510300  | -2.38309400 | H | 5.21061600  | -2.87031900 | 1.95970200  |
| H | -5.03288900 | 4.42378500  | -1.01474000 | H | 3.82768500  | -3.36657200 | 3.96585400  |
| S | -1.87724400 | -0.23653900 | 2.43425300  | C | -0.50541400 | 0.59392600  | -0.92631800 |
| O | -2.85123300 | -0.45040500 | 3.51812000  | H | -1.07496400 | 1.42338200  | -1.33501100 |
|   |             |             |             | C | 0.50071600  | 0.80907700  | 0.08205700  |
|   |             |             |             | H | 0.24294200  | 0.37577000  | 1.05397700  |
|   |             |             |             | C | 1.25964500  | 2.04467300  | 0.18404100  |

|   |            |            |             |   |             |             |             |
|---|------------|------------|-------------|---|-------------|-------------|-------------|
| C | 1.58666200 | 2.81117600 | -0.94730400 | N | -0.13424100 | -2.63927000 | -0.42369300 |
| C | 1.70248700 | 2.46065100 | 1.45399900  | C | 1.44371600  | -0.60331200 | -0.05595100 |
| C | 2.32960800 | 3.97935200 | -0.81277100 | C | 2.48598600  | -0.62062600 | -1.19293200 |
| H | 1.27543100 | 2.46890900 | -1.92995000 | C | 3.75521000  | -0.09097400 | -0.92442500 |
| C | 2.45111600 | 3.62586000 | 1.58229700  | C | 2.20797400  | -1.07976200 | -2.48348400 |
| H | 1.42117700 | 1.86938900 | 2.32034300  | C | 4.71716600  | -0.01068400 | -1.92530500 |
| C | 2.76488500 | 4.38571500 | 0.45105700  | H | 3.97843800  | 0.26998600  | 0.07266800  |
| H | 2.58157100 | 4.56650600 | -1.69028800 | C | 3.17559000  | -1.00130800 | -3.48850100 |
| H | 2.78477600 | 3.94903700 | 2.56327300  | H | 1.23814000  | -1.50006000 | -2.72431700 |
| H | 3.34972500 | 5.29470300 | 0.55480600  | C | 4.43077900  | -0.46427600 | -3.21453300 |

**(R)-INT-3**

|   |             |             |             |
|---|-------------|-------------|-------------|
| C | -4.58075100 | 0.92130700  | -0.31337900 |
| C | -3.77767300 | 0.30270900  | 0.63984800  |
| C | -2.74448700 | 1.01971900  | 1.24626900  |
| C | -2.52514900 | 2.35271600  | 0.89901600  |
| C | -3.32890300 | 2.96048800  | -0.06691900 |
| C | -4.36918300 | 2.25724400  | -0.68568800 |
| H | -5.38284000 | 0.35830700  | -0.78416000 |
| H | -3.93573400 | -0.73652400 | 0.90625800  |
| H | -1.71801400 | 2.88942300  | 1.38433800  |
| H | -3.15037400 | 3.99800200  | -0.33829300 |
| C | -5.26360600 | 2.92690600  | -1.69945600 |
| H | -4.74388400 | 3.73672200  | -2.21964800 |
| H | -5.62462800 | 2.21596000  | -2.44911300 |
| H | -6.14656100 | 3.36376700  | -1.21722800 |
| S | -1.68681100 | 0.20627500  | 2.46182100  |
| O | -2.54776400 | -0.14624700 | 3.60219100  |
| O | -1.13500600 | -0.97774700 | 1.72106300  |
| O | -0.63162200 | 1.23588900  | 2.74552500  |
| C | -1.80350700 | -1.50617100 | -1.53738900 |
| C | -1.40617700 | -2.77609000 | -1.04674200 |
| C | -2.18158100 | -3.91376200 | -1.19598400 |
| C | -3.39839000 | -3.76691600 | -1.86926400 |
| C | -3.80759600 | -2.52460300 | -2.36933700 |
| C | -3.01800400 | -1.38455400 | -2.20616700 |
| C | -0.75273000 | -0.58429900 | -1.13069900 |
| C | 0.23435600  | -1.37234600 | -0.45704800 |
| H | -1.86729100 | -4.87382400 | -0.80132800 |
| H | -4.03674100 | -4.63389100 | -2.00230100 |
| H | -4.75856500 | -2.44606700 | -2.88552500 |
| H | -3.34924900 | -0.41963200 | -2.57062800 |
| H | 0.34136800  | -3.34996600 | 0.11799800  |

|   |             |             |             |
|---|-------------|-------------|-------------|
| C | 1.44371600  | -0.60331200 | -0.05595100 |
| C | 2.48598600  | -0.62062600 | -1.19293200 |
| C | 3.75521000  | -0.09097400 | -0.92442500 |
| C | 2.20797400  | -1.07976200 | -2.48348400 |
| C | 4.71716600  | -0.01068400 | -1.92530500 |
| H | 3.97843800  | 0.26998600  | 0.07266800  |
| C | 3.17559000  | -1.00130800 | -3.48850100 |
| H | 1.23814000  | -1.50006000 | -2.72431700 |
| C | 4.43077900  | -0.46427600 | -3.21453300 |
| H | 5.69047200  | 0.41271800  | -1.69862200 |
| H | 2.94227700  | -1.36649100 | -4.48392600 |
| H | 5.18187500  | -0.40295300 | -3.99576800 |
| C | 2.05564400  | -1.16401800 | 1.22904200  |
| C | 1.84875600  | -0.60683000 | 2.49140600  |
| C | 2.80227300  | -2.34956200 | 1.12206000  |
| C | 2.39609800  | -1.21714700 | 3.62136200  |
| H | 1.21869600  | 0.26300300  | 2.62175900  |
| C | 3.33379600  | -2.96359800 | 2.25408900  |
| H | 2.99499000  | -2.77696300 | 0.14206100  |
| C | 3.13594800  | -2.39254100 | 3.51176200  |
| H | 2.21859400  | -0.77195500 | 4.59507500  |
| H | 3.90980200  | -3.87827300 | 2.15043400  |
| H | 3.55195400  | -2.86331500 | 4.39719000  |
| C | -0.42540500 | 0.72398500  | -0.94889000 |
| H | -0.99057600 | 1.58330100  | -1.28835600 |
| C | 0.75829500  | 0.86367100  | -0.03447300 |
| H | 0.30156900  | 0.95807000  | 0.96638600  |
| C | 1.63378000  | 2.06333400  | -0.25378500 |
| C | 2.00563000  | 2.47818400  | -1.53871600 |
| C | 2.08418100  | 2.78909400  | 0.85505600  |
| C | 2.82494000  | 3.59060700  | -1.71301400 |
| H | 1.67162700  | 1.90967800  | -2.40181600 |
| C | 2.91057300  | 3.89879700  | 0.68163600  |
| H | 1.76651600  | 2.48857300  | 1.84830200  |
| C | 3.28406500  | 4.30003300  | -0.60166400 |
| H | 3.11099600  | 3.89952600  | -2.71374200 |
| H | 3.25463400  | 4.45483300  | 1.54820100  |
| H | 3.92661100  | 5.16488600  | -0.73621500 |

**INT-4**

|   |            |             |            |
|---|------------|-------------|------------|
| C | 5.04724800 | -1.23208000 | 0.30416700 |
| C | 3.92596200 | -1.83357300 | 0.87217200 |
| C | 3.10435800 | -2.63866000 | 0.08865400 |

|   |             |             |             |   |             |             |             |
|---|-------------|-------------|-------------|---|-------------|-------------|-------------|
| C | 3.42780100  | -2.88111500 | -1.24784200 | C | -1.45917100 | -1.94579300 | 3.29796700  |
| C | 4.55337400  | -2.27876300 | -1.80303900 | H | -0.99941100 | -1.98917900 | 1.21955100  |
| C | 5.36727200  | -1.42718800 | -1.04335300 | C | -2.96771700 | -0.22371800 | 4.04870300  |
| H | 5.67126800  | -0.58187100 | 0.91134300  | H | -3.74729300 | 1.07209200  | 2.52186700  |
| H | 3.66336500  | -1.66714000 | 1.90915500  | C | -2.14982600 | -1.32042400 | 4.33072000  |
| H | 2.78763100  | -3.51948200 | -1.84787300 | H | -0.79306800 | -2.77897900 | 3.49003600  |
| H | 4.79849600  | -2.45778500 | -2.84676100 | H | -3.52288600 | 0.26478500  | 4.84402200  |
| C | 6.52087600  | -0.69225700 | -1.67571000 | H | -2.05053300 | -1.67860400 | 5.35030200  |
| H | 6.19089300  | 0.28969900  | -2.03589500 | C | -0.94914200 | 0.62560000  | -1.62211700 |
| H | 7.33139200  | -0.52520300 | -0.96025200 | H | -0.48772500 | 0.46754200  | -2.58853900 |
| H | 6.92718400  | -1.24035800 | -2.53079100 | C | -1.69759100 | -0.46996300 | -0.90847100 |
| S | 1.53969400  | -3.25309300 | 0.73655600  | H | -0.91999900 | -1.10078400 | -0.46110000 |
| O | 1.57716900  | -4.72279600 | 0.72198800  | C | -2.52045800 | -1.36895100 | -1.79494400 |
| O | 1.40530600  | -2.63135400 | 2.09125500  | C | -3.36017200 | -0.84512500 | -2.78625400 |
| O | 0.53786900  | -2.67474100 | -0.24727100 | C | -2.44063700 | -2.75575500 | -1.62335300 |
| C | -0.26544900 | 3.06934000  | -0.73329800 | C | -4.12976900 | -1.69241000 | -3.57853100 |
| C | -0.63906200 | 3.53511300  | 0.55524700  | H | -3.43224600 | 0.23044200  | -2.91655900 |
| C | -0.16689500 | 4.72521000  | 1.08682300  | C | -3.21630700 | -3.60269900 | -2.41523400 |
| C | 0.70252700  | 5.47278300  | 0.28799300  | H | -1.74569300 | -3.16335600 | -0.89558200 |
| C | 1.08498000  | 5.02996300  | -0.98540100 | C | -4.06461300 | -3.07426700 | -3.38861400 |
| C | 0.61068800  | 3.82653100  | -1.50660800 | H | -4.78357200 | -1.27556900 | -4.33847300 |
| C | -0.91877700 | 1.77692400  | -0.88382400 | H | -3.14768800 | -4.67707100 | -2.27634200 |
| C | -1.65864400 | 1.54968100  | 0.30839800  | H | -4.66761400 | -3.73602700 | -4.00304900 |
| H | -0.44993900 | 5.05876000  | 2.07942400  | C | 2.72394800  | 1.70563800  | -0.16917000 |
| H | 1.09564400  | 6.40942300  | 0.66875900  | C | 2.41160500  | 0.79307500  | -1.21856400 |
| H | 1.78015900  | 5.62309300  | -1.56906600 | C | 2.96934700  | 0.90271800  | -2.49027400 |
| H | 0.95025500  | 3.46710100  | -2.47108200 | C | 3.85285300  | 1.95808900  | -2.71794100 |
| H | -1.85514500 | 2.58953300  | 2.09180400  | C | 4.16642300  | 2.87664700  | -1.69901700 |
| N | -1.49759600 | 2.57040100  | 1.14484500  | C | 3.61067400  | 2.75726500  | -0.42695200 |
| C | -2.44876400 | 0.27971700  | 0.31379200  | C | 1.97170600  | 1.28499700  | 0.99322200  |
| C | -3.91213900 | 0.54955000  | -0.07267200 | C | 1.26314500  | 0.17203700  | 0.60972000  |
| C | -4.83988000 | -0.48672200 | 0.08913200  | H | 2.73889700  | 0.18148700  | -3.26768600 |
| C | -4.33444600 | 1.75492700  | -0.63866400 | H | 4.30864400  | 2.06965200  | -3.69692900 |
| C | -6.15845000 | -0.32454000 | -0.32145900 | H | 4.85756300  | 3.68715200  | -1.90935800 |
| H | -4.51595800 | -1.42565900 | 0.52306600  | H | 3.85610300  | 3.47425000  | 0.35060900  |
| C | -5.66054500 | 1.91958400  | -1.04616600 | H | 1.31055000  | -1.06266700 | -1.04710600 |
| H | -3.63626400 | 2.57365600  | -0.77729500 | N | 1.49041600  | -0.11393200 | -0.71822400 |
| C | -6.57457900 | 0.88021300  | -0.89255200 | H | 0.63450600  | -0.46660400 | 1.20053800  |
| H | -6.86143400 | -1.14233000 | -0.19947700 | C | 2.01593800  | 1.84243900  | 2.38121500  |
| H | -5.97354300 | 2.86321300  | -1.48234500 | H | 2.77970300  | 2.62684700  | 2.44596600  |
| H | -7.60430300 | 1.00669200  | -1.21166000 | H | 1.05951000  | 2.31532200  | 2.64416200  |
| C | -2.36863400 | -0.37406200 | 1.69705400  | C | 2.30947100  | 0.76305900  | 3.44451000  |
| C | -1.57152400 | -1.48109800 | 1.98512600  | H | 2.43957400  | 1.25874200  | 4.41575400  |
| C | -3.07755100 | 0.24442900  | 2.74262000  | H | 3.26028800  | 0.27097700  | 3.19813900  |

|             |             |             |             |   |             |             |             |
|-------------|-------------|-------------|-------------|---|-------------|-------------|-------------|
| O           | 1.25384200  | -0.16611100 | 3.57766800  | H | -4.04103400 | 2.15166200  | -0.86979600 |
| H           | 1.43761400  | -0.97578300 | 3.06508200  | C | -6.68993700 | 0.02847700  | -0.83664200 |
|             |             |             |             | H | -6.66595400 | -1.95695900 | 0.00668200  |
|             |             |             |             | H | -6.39883300 | 2.03066300  | -1.57577300 |
|             |             |             |             | H | -7.72484000 | -0.03020600 | -1.15888900 |
| <b>TS-3</b> |             |             |             | C | -2.36938100 | -0.28760000 | 1.84026800  |
| C           | 5.23225200  | -1.00645400 | 0.30681400  | C | -1.42964700 | -1.22792700 | 2.26865900  |
| C           | 4.13947400  | -1.59380200 | 0.94161200  | C | -3.16425400 | 0.35220700  | 2.80716600  |
| C           | 3.25787000  | -2.38121700 | 0.20683000  | C | -1.25067600 | -1.48579500 | 3.63041800  |
| C           | 3.49068400  | -2.61869000 | -1.14922900 | H | -0.79853900 | -1.77253500 | 1.57893800  |
| C           | 4.58983700  | -2.03377400 | -1.77005600 | C | -2.99581000 | 0.08553700  | 4.16283500  |
| C           | 5.46615400  | -1.20315600 | -1.05835200 | H | -3.94393600 | 1.03964700  | 2.48839500  |
| H           | 5.90821800  | -0.37607800 | 0.87839800  | C | -2.02663300 | -0.82956900 | 4.58087200  |
| H           | 3.95272800  | -1.43842200 | 1.99668400  | H | -0.48007400 | -2.19131400 | 3.92000100  |
| H           | 2.79907000  | -3.23748300 | -1.71092200 | H | -3.62223300 | 0.59075200  | 4.89211000  |
| H           | 4.76431700  | -2.20849400 | -2.82832200 | H | -1.88172200 | -1.02770800 | 5.63802000  |
| C           | 6.60236700  | -0.50240200 | -1.75756100 | C | -0.73822800 | 0.39025700  | -1.36507800 |
| H           | 6.26383000  | 0.45799500  | -2.16410100 | H | -0.34590900 | 0.20632800  | -2.35742800 |
| H           | 7.43005600  | -0.29795100 | -1.07250800 | C | -1.64659500 | -0.64139500 | -0.70400200 |
| H           | 6.98778100  | -1.09605700 | -2.59167500 | H | -1.00984600 | -1.33375400 | -0.15832800 |
| S           | 1.77258300  | -3.04796500 | 0.97708000  | C | -2.39562700 | -1.48561800 | -1.70923600 |
| O           | 1.92018600  | -4.50232400 | 1.11416700  | C | -3.12297100 | -0.91115800 | -2.75894600 |
| O           | 1.62529100  | -2.29157100 | 2.25737200  | C | -2.35392700 | -2.87828200 | -1.58705500 |
| O           | 0.69682500  | -2.65688200 | -0.02922800 | C | -3.82653500 | -1.71477100 | -3.65172400 |
| C           | -0.49728300 | 3.01909500  | -0.80640600 | H | -3.15972900 | 0.16892200  | -2.85995000 |
| C           | -1.14037200 | 3.64300900  | 0.30013900  | C | -3.05940300 | -3.68334100 | -2.48186700 |
| C           | -0.88098500 | 4.95979300  | 0.66731400  | H | -1.74802600 | -3.32430100 | -0.80402100 |
| C           | 0.04892200  | 5.66151500  | -0.09830400 | C | -3.80216900 | -3.10392600 | -3.51025400 |
| C           | 0.69527900  | 5.06290200  | -1.19322900 | H | -4.39719400 | -1.25818200 | -4.45464000 |
| C           | 0.43194000  | 3.74566700  | -1.55655600 | H | -3.02163100 | -4.76321700 | -2.37732900 |
| C           | -1.00733800 | 1.66395500  | -0.83233900 | H | -4.35401500 | -3.73070600 | -4.20418900 |
| C           | -1.90476400 | 1.53209400  | 0.22521800  | C | 2.69210200  | 1.59615400  | -0.40443700 |
| H           | -1.37507600 | 5.42041700  | 1.51658400  | C | 2.11961500  | 0.64114600  | -1.27469600 |
| H           | 0.27917400  | 6.68982500  | 0.16042600  | C | 2.48540300  | 0.52962000  | -2.60657400 |
| H           | 1.42003300  | 5.63719400  | -1.76081100 | C | 3.45702600  | 1.41751300  | -3.08248400 |
| H           | 0.95457600  | 3.28159300  | -2.38556700 | C | 4.02977300  | 2.37833800  | -2.23802500 |
| H           | -2.53596300 | 2.83785900  | 1.73859600  | C | 3.65759800  | 2.47380500  | -0.89403600 |
| N           | -2.00111000 | 2.70004700  | 0.89371600  | C | 2.06213600  | 1.41750900  | 0.90111900  |
| C           | -2.52986200 | 0.17259800  | 0.37927000  | C | 1.16569900  | 0.40804400  | 0.76937300  |
| C           | -4.01162200 | 0.17364400  | -0.01189000 | H | 2.05174500  | -0.22774000 | -3.25120500 |
| C           | -4.77104800 | -0.97697000 | 0.23457300  | H | 3.77310300  | 1.35670000  | -4.11871300 |
| C           | -4.61265300 | 1.25312700  | -0.66229100 | H | 4.77789900  | 3.05702800  | -2.63573900 |
| C           | -6.09582500 | -1.05247400 | -0.18040100 | H | 4.10820800  | 3.22035000  | -0.24795100 |
| H           | -4.31090100 | -1.81815400 | 0.74103100  | H | 1.05079200  | -1.11867300 | -0.61050800 |
| C           | -5.94664800 | 1.18223400  | -1.07117200 |   |             |             |             |



|          |             |             |             |   |             |             |             |
|----------|-------------|-------------|-------------|---|-------------|-------------|-------------|
| N        | 1.12672900  | -0.07226600 | -0.55888500 | C | 4.24223500  | -2.29451900 | 2.52951700  |
| H        | 0.53100800  | -0.03438900 | 1.51482300  | H | 3.79190500  | -2.29567500 | 0.43002000  |
| C        | 2.39827900  | 2.10902400  | 2.18387400  | C | 3.98342100  | -1.70691700 | 3.76975200  |
| H        | 3.17036800  | 2.86906800  | 2.01768500  | H | 2.83309700  | -0.21633800 | 4.81285100  |
| H        | 1.51557400  | 2.62751900  | 2.57531600  | H | 4.99260500  | -3.07431900 | 2.44049300  |
| C        | 2.88773700  | 1.11468300  | 3.26221500  | H | 4.52566300  | -2.02949100 | 4.65292600  |
| H        | 3.16597900  | 1.68724100  | 4.15549100  | C | -0.48473600 | 0.21587400  | -0.61256100 |
| H        | 3.79615400  | 0.61568200  | 2.89759900  | H | -0.35642800 | 0.71436200  | -1.57981000 |
| O        | 1.89464000  | 0.19129900  | 3.64631200  | C | 0.68054400  | 0.61154000  | 0.37124600  |
| H        | 1.93894100  | -0.61709400 | 3.10115200  | H | 0.24606200  | 0.42910200  | 1.35644200  |
|          |             |             |             | C | 1.06681000  | 2.06640600  | 0.29520100  |
| <b>3</b> |             |             |             | C | 1.52520000  | 2.65909000  | -0.89214900 |
| C        | -0.99675200 | -2.44531400 | -1.14177300 | C | 0.88233200  | 2.88668300  | 1.41381600  |
| C        | -0.10039900 | -3.53044900 | -0.88275800 | C | 1.80323400  | 4.02268700  | -0.94673400 |
| C        | -0.45772500 | -4.85563900 | -1.13384100 | H | 1.66400900  | 2.05526000  | -1.78104500 |
| C        | -1.72713800 | -5.09470000 | -1.65209100 | C | 1.15816800  | 4.25271400  | 1.36319900  |
| C        | -2.62143100 | -4.04022200 | -1.91841800 | H | 0.49238500  | 2.45476200  | 2.33120400  |
| C        | -2.26794300 | -2.71902300 | -1.67115900 | C | 1.62322400  | 4.82528500  | 0.18102200  |
| C        | -0.30391100 | -1.26425500 | -0.71094400 | H | 2.15852100  | 4.45926300  | -1.87520000 |
| C        | 0.91744800  | -1.64045700 | -0.23604900 | H | 0.99916800  | 4.86800000  | 2.24335300  |
| H        | 0.22746900  | -5.67264900 | -0.92890500 | H | 1.83629700  | 5.88880300  | 0.13491300  |
| H        | -2.03394100 | -6.11601300 | -1.85342000 | C | -3.72684000 | 1.71793200  | 0.27012800  |
| H        | -3.60372200 | -4.26574900 | -2.32043600 | C | -2.46339600 | 1.78630500  | -0.38296800 |
| H        | -2.95652900 | -1.90731600 | -1.88590100 | C | -2.07792800 | 2.90025700  | -1.13647800 |
| H        | 1.83069200  | -3.53669500 | 0.04352300  | C | -2.98563000 | 3.94733700  | -1.24207700 |
| N        | 1.07934800  | -3.00158400 | -0.36091000 | C | -4.24525600 | 3.89580800  | -0.61186300 |
| C        | 1.81344400  | -0.50589900 | 0.19708000  | C | -4.62078100 | 2.79303600  | 0.14383900  |
| C        | 2.81404200  | -0.12535100 | -0.90536100 | C | -3.78644700 | 0.45477000  | 0.96295100  |
| C        | 3.91929000  | 0.67601100  | -0.59104900 | C | -2.59134600 | -0.17557600 | 0.71401700  |
| C        | 2.60846100  | -0.49083600 | -2.23968900 | H | -1.09945800 | 2.96264800  | -1.59764000 |
| C        | 4.78891900  | 1.11293100  | -1.58655500 | H | -2.71259300 | 4.82778400  | -1.81567300 |
| H        | 4.08732600  | 0.96998000  | 0.43894300  | H | -4.92597300 | 4.73525200  | -0.71524000 |
| C        | 3.47924900  | -0.05275400 | -3.23931600 | H | -5.58944200 | 2.76145600  | 0.63397400  |
| H        | 1.75882600  | -1.11137700 | -2.50239200 | N | -1.79172300 | 0.60709100  | -0.11036400 |
| C        | 4.57061600  | 0.75273500  | -2.91732900 | H | -2.23080200 | -1.13970000 | 1.03830500  |
| H        | 5.63425000  | 1.74116500  | -1.32303100 | C | -4.93994900 | -0.06545900 | 1.77352000  |
| H        | 3.30262500  | -0.34590000 | -4.26980900 | H | -4.96769100 | 0.42004700  | 2.76017700  |
| H        | 5.24751200  | 1.09353300  | -3.69468100 | H | -5.87966100 | 0.19955100  | 1.27324500  |
| C        | 2.56902500  | -0.86630400 | 1.48040900  | C | -4.91071600 | -1.58397000 | 1.97376000  |
| C        | 2.33019500  | -0.27838700 | 2.72387700  | H | -5.76598200 | -1.88866300 | 2.58443800  |
| C        | 3.54863900  | -1.87057600 | 1.40014600  | H | -4.00173100 | -1.86464700 | 2.53206500  |
| C        | 3.03309600  | -0.69344400 | 3.85829300  | O | -5.01744000 | -2.31214700 | 0.76152100  |
| H        | 1.60622800  | 0.51927200  | 2.82290500  | H | -4.28016100 | -2.04119700 | 0.19650300  |

**INT-5**

|   |             |             |             |
|---|-------------|-------------|-------------|
| C | 4.89300600  | -1.93540700 | 0.77948400  |
| C | 3.65895400  | -2.17186900 | 1.38118300  |
| C | 2.67735500  | -2.87616200 | 0.68905500  |
| C | 2.94275700  | -3.38178700 | -0.58507500 |
| C | 4.18444600  | -3.14577500 | -1.17475100 |
| C | 5.17037600  | -2.40097700 | -0.51100200 |
| H | 5.64464500  | -1.35676900 | 1.30925800  |
| H | 3.43064800  | -1.78288900 | 2.36607700  |
| H | 2.16975600  | -3.92767500 | -1.11517400 |
| H | 4.38934700  | -3.53396500 | -2.16939000 |
| C | 6.47532800  | -2.06139300 | -1.18507000 |
| H | 6.44895800  | -1.03636600 | -1.57456400 |
| H | 7.31465400  | -2.12217900 | -0.48566000 |
| H | 6.68107800  | -2.73298800 | -2.02332500 |
| S | 1.01836200  | -3.05023900 | 1.36959200  |
| O | 0.84013300  | -4.44642400 | 1.79925300  |
| O | 0.93663700  | -2.03814700 | 2.47386300  |
| O | 0.15424200  | -2.64942300 | 0.20069500  |
| C | -0.20543300 | 3.05249100  | -0.32662400 |
| C | -0.86983300 | 3.54973200  | 0.82319100  |
| C | -0.51518800 | 4.74108100  | 1.43512700  |
| C | 0.55340000  | 5.44594900  | 0.87029500  |
| C | 1.23088400  | 4.96528700  | -0.25788000 |
| C | 0.86024700  | 3.76521100  | -0.86731300 |
| C | -0.83333100 | 1.77338100  | -0.61225000 |
| C | -1.85965200 | 1.59068400  | 0.36088100  |
| H | -1.02658800 | 5.10441200  | 2.31986500  |
| H | 0.86862200  | 6.37893000  | 1.32532700  |
| H | 2.07101600  | 5.52388100  | -0.65544100 |
| H | 1.41262600  | 3.38051000  | -1.71615100 |
| H | -2.42276100 | 2.64131000  | 2.04733000  |
| N | -1.88131700 | 2.61881300  | 1.19230700  |
| C | -2.64300500 | 0.33045200  | 0.19724000  |
| C | -3.96542700 | 0.61262800  | -0.53679300 |
| C | -4.92292400 | -0.40797300 | -0.58768700 |
| C | -4.21462400 | 1.80936500  | -1.21295100 |
| C | -6.09594400 | -0.23991600 | -1.31494900 |
| H | -4.73317700 | -1.34037800 | -0.06906000 |
| C | -5.39626300 | 1.98031900  | -1.93828600 |
| H | -3.49035400 | 2.61681100  | -1.19170100 |
| C | -6.33734400 | 0.95571500  | -1.99539300 |
| H | -6.82110000 | -1.04640400 | -1.35437800 |

|   |             |             |             |
|---|-------------|-------------|-------------|
| H | -5.57527700 | 2.91716200  | -2.45683900 |
| H | -7.25372200 | 1.08648100  | -2.56221100 |
| C | -2.90957300 | -0.29982600 | 1.56694400  |
| C | -2.20793200 | -1.40378400 | 2.04610600  |
| C | -3.85168400 | 0.32475300  | 2.40204400  |
| C | -2.42196500 | -1.86579800 | 3.34645600  |
| H | -1.46767900 | -1.90312500 | 1.43763100  |
| C | -4.06643000 | -0.13848200 | 3.69745800  |
| H | -4.44384500 | 1.15327500  | 2.02143700  |
| C | -3.34639100 | -1.23640900 | 4.17562300  |
| H | -1.83839700 | -2.70970800 | 3.69829200  |
| H | -4.80060300 | 0.35192700  | 4.32976100  |
| H | -3.50919200 | -1.59583400 | 5.18689900  |
| C | -0.70750900 | 0.60871200  | -1.30834600 |
| H | 0.02743600  | 0.39958000  | -2.07697400 |
| C | -1.63750800 | -0.44910300 | -0.80360400 |
| H | -0.98470200 | -1.10255500 | -0.19902300 |
| C | -2.26065800 | -1.31656300 | -1.86752700 |
| C | -2.75693900 | -0.75873900 | -3.05260400 |
| C | -2.36926200 | -2.69615600 | -1.65959400 |
| C | -3.37534200 | -1.56136500 | -4.00727100 |
| H | -2.68721700 | 0.31338600  | -3.21153100 |
| C | -2.99410400 | -3.49790600 | -2.61460400 |
| H | -1.93266200 | -3.13380800 | -0.76842000 |
| C | -3.50215000 | -2.93382100 | -3.78538800 |
| H | -3.76395100 | -1.11651800 | -4.91821200 |
| H | -3.07445700 | -4.56733400 | -2.44606500 |
| H | -3.98905700 | -3.56129900 | -4.52586900 |
| C | 3.59863400  | 1.80788800  | -0.36630000 |
| C | 3.65798100  | 0.87689000  | -1.44376400 |
| C | 4.57182400  | 1.01066100  | -2.49138100 |
| C | 5.43069600  | 2.10652400  | -2.46386200 |
| C | 5.37249100  | 3.05174000  | -1.42081000 |
| C | 4.46486700  | 2.91248900  | -0.37620100 |
| C | 2.57877400  | 1.34469200  | 0.54592300  |
| C | 2.06321900  | 0.19879800  | -0.00586700 |
| H | 4.60906900  | 0.28618100  | -3.29950800 |
| H | 6.15428600  | 2.23669300  | -3.26268300 |
| H | 6.05224700  | 3.89842700  | -1.43414000 |
| H | 4.42950300  | 3.64357800  | 0.42650800  |
| H | 2.69929500  | -1.00730800 | -1.60396600 |
| N | 2.67668500  | -0.07167800 | -1.22199600 |
| H | 1.31492900  | -0.46955900 | 0.37749700  |
| C | 2.20601800  | 1.98467100  | 1.85020900  |

H 3.12162300 2.32618600 2.35353900  
H 1.61126700 2.88939700 1.68135600  
C 1.45848400 1.06960200 2.82010200  
H 1.27553000 1.62260500 3.75420400  
H 2.08604300 0.20611600 3.06481500  
O 0.21757400 0.61678700 2.28628700  
H 0.25214500 -0.36164800 2.34900600

**TS-4**

C 5.37535900 -0.10321500 0.92819800  
C 4.24032400 -0.66422600 1.51129900  
C 3.67985500 -1.81516200 0.96447700  
C 4.27336300 -2.42685500 -0.14141100  
C 5.40927600 -1.86047600 -0.71256800  
C 5.96934000 -0.68230500 -0.19770100  
H 5.80079700 0.80443000 1.34798000  
H 3.77537600 -0.21983100 2.38239500  
H 3.83744400 -3.33093500 -0.55386000  
H 5.86856000 -2.33406400 -1.57645700  
C 7.15080500 -0.03108800 -0.86823300  
H 6.81176600 0.70489100 -1.60766000  
H 7.78115100 0.49644700 -0.14659700  
H 7.77079900 -0.76439600 -1.39186900  
S 2.13269900 -2.47523400 1.61134800  
O 2.40056300 -3.81741400 2.14626100  
O 1.69265300 -1.46750700 2.63286200  
O 1.23026200 -2.46814100 0.39955700  
C -1.62096800 3.18811300 -0.24554200  
C -2.75356900 3.39490700 0.59373800  
C -3.19760900 4.66623200 0.94244200  
C -2.49163300 5.75284100 0.42746100  
C -1.37773700 5.57071600 -0.40972900  
C -0.93415300 4.29641300 -0.75207300  
C -1.47713000 1.75259000 -0.35619100  
C -2.51605200 1.17413400 0.36530100  
H -4.05869600 4.80912800 1.58718300  
H -2.81176300 6.75880500 0.67798600  
H -0.85548500 6.44077900 -0.79409600  
H -0.06547700 4.15809800 -1.38774100  
H -4.05972600 1.96630200 1.54812000  
N -3.27131900 2.13531000 0.94160200  
C -2.61967900 -0.31956900 0.26758500  
C -3.88602800 -0.76530800 -0.47105700

C -4.20273700 -2.12973500 -0.48815200  
C -4.69155400 0.12196200 -1.18798800  
C -5.28917500 -2.59578600 -1.21977800  
H -3.58234300 -2.82456700 0.06698500  
C -5.78956500 -0.34372100 -1.91550900  
H -4.45953300 1.18146200 -1.20179900  
C -6.08893700 -1.70307000 -1.93778700  
H -5.51176900 -3.65812200 -1.23177300  
H -6.40455600 0.36053700 -2.46767300  
H -6.93812400 -2.06714300 -2.50761800  
C -2.60163400 -0.89732000 1.69475500  
C -1.46086900 -1.42531800 2.29802200  
C -3.77639100 -0.79055600 2.45865500  
C -1.48215100 -1.82658600 3.63510200  
H -0.53553300 -1.55867900 1.75959300  
C -3.79973600 -1.18993800 3.79192400  
H -4.68748700 -0.42316200 1.99360500  
C -2.64687700 -1.70719800 4.38792400  
H -0.56849000 -2.22202900 4.06555900  
H -4.71975200 -1.10434600 4.36277300  
H -2.66265900 -2.01848700 5.42784400  
C -0.65650700 0.74634200 -0.91748100  
H -0.12624600 0.88529300 -1.85242700  
C -1.30153900 -0.62337200 -0.62799400  
H -0.62545800 -1.22360100 -0.02669900  
C -1.51605900 -1.41964500 -1.89585700  
C -2.12876600 -0.86448900 -3.02611500  
C -1.08085900 -2.74898200 -1.93840700  
C -2.33310000 -1.63340700 -4.16833900  
H -2.46777600 0.16636200 -3.00230100  
C -1.28504300 -3.51877000 -3.08423500  
H -0.56803500 -3.16680200 -1.07684900  
C -1.91648500 -2.96611600 -4.19800400  
H -2.82055900 -1.19517600 -5.03397500  
H -0.94619100 -4.55011200 -3.10514100  
H -2.07870200 -3.56683600 -5.08789200  
C 2.69263600 1.96566800 -0.85839800  
C 2.78252300 0.69576600 -1.53022700  
C 3.67632200 0.49049000 -2.59442700  
C 4.47739500 1.55419100 -2.96643000  
C 4.41036700 2.81372800 -2.31188400  
C 3.53092000 3.02722200 -1.27108100  
C 1.73613100 1.82383000 0.17805100  
C 1.20207700 0.51636800 0.05580900

|          |             |             |             |   |             |             |             |
|----------|-------------|-------------|-------------|---|-------------|-------------|-------------|
| H        | 3.74210200  | -0.47207500 | -3.08770800 | C | -2.36350600 | 0.00687700  | 1.60137900  |
| H        | 5.18120000  | 1.42566800  | -3.78302800 | C | -1.70897000 | -0.35171800 | 2.78297100  |
| H        | 5.06296300  | 3.61438700  | -2.64389900 | C | -3.66058100 | 0.53804800  | 1.70352800  |
| H        | 3.48046800  | 3.98969900  | -0.77156700 | C | -2.32628400 | -0.18484400 | 4.02511900  |
| H        | 1.84982700  | -1.17108000 | -0.99123100 | H | -0.71003600 | -0.76644800 | 2.75499400  |
| N        | 1.90180400  | -0.15541900 | -0.94460100 | C | -4.27476100 | 0.71568900  | 2.94016800  |
| H        | 0.79938900  | -0.04325900 | 0.87993400  | H | -4.20062700 | 0.78946500  | 0.79537900  |
| C        | 1.40707100  | 2.74277900  | 1.30152100  | C | -3.60775500 | 0.35303700  | 4.11168100  |
| H        | 2.01323200  | 3.65330300  | 1.24008400  | H | -1.79754600 | -0.48047300 | 4.92633800  |
| H        | 0.35723000  | 3.04643700  | 1.25538700  | H | -5.27775500 | 1.12900200  | 2.98836600  |
| C        | 1.60133100  | 2.06965700  | 2.68397700  | H | -4.08490400 | 0.48301300  | 5.07789100  |
| H        | 1.50071000  | 2.85156500  | 3.44905800  | C | 0.55723000  | 0.01444300  | -0.91943100 |
| H        | 2.61877900  | 1.66621900  | 2.75623200  | H | 0.39026600  | -0.41147300 | -1.91909700 |
| O        | 0.62329000  | 1.08008600  | 2.90924600  | C | -0.30907600 | -0.78668900 | 0.13370300  |
| H        | 1.03652400  | 0.19277100  | 2.90329000  | H | 0.18355200  | -0.57939500 | 1.08286800  |
|          |             |             |             | C | -0.29049200 | -2.28084200 | -0.06877500 |
|          |             |             |             | C | -0.57531800 | -2.86985200 | -1.31112400 |
| <b>4</b> |             |             |             | C | 0.06746300  | -3.12041900 | 0.99228000  |
| C        | 0.10871300  | 2.71607600  | -1.32909800 | C | -0.50784600 | -4.25132100 | -1.47934200 |
| C        | -1.06206600 | 3.43384600  | -0.92373700 | H | -0.87259300 | -2.24759200 | -2.14776400 |
| C        | -1.22483500 | 4.79294200  | -1.19431000 | C | 0.13185100  | -4.50430700 | 0.82987400  |
| C        | -0.20939500 | 5.43697800  | -1.89440800 | H | 0.31285700  | -2.68394400 | 1.95564600  |
| C        | 0.94463800  | 4.74629900  | -2.31180800 | C | -0.15549000 | -5.07522200 | -0.40884500 |
| C        | 1.11365000  | 3.39540600  | -2.03493900 | H | -0.73763300 | -4.68472000 | -2.44801300 |
| C        | -0.06769500 | 1.37504500  | -0.84467100 | H | 0.41553300  | -5.13272800 | 1.66852600  |
| C        | -1.27852300 | 1.31875800  | -0.21915200 | H | -0.10263600 | -6.15146000 | -0.54121400 |
| H        | -2.11332500 | 5.32870300  | -0.87395200 | C | 4.12926300  | -0.11592500 | 0.20405100  |
| H        | -0.30956700 | 6.49351800  | -2.12212300 | C | 3.96125200  | -1.28557200 | -0.58718500 |
| H        | 1.71593200  | 5.28283600  | -2.85528400 | C | 4.98275000  | -2.22131100 | -0.76650400 |
| H        | 2.01046500  | 2.86857300  | -2.34518800 | C | 6.19710900  | -1.97365300 | -0.13585800 |
| H        | -2.74275900 | 2.78965600  | 0.23773000  | C | 6.38913000  | -0.81899800 | 0.64873900  |
| N        | -1.90841800 | 2.54276900  | -0.26951900 | C | 5.36988700  | 0.10921400  | 0.82184300  |
| C        | -1.72689700 | -0.05521600 | 0.20650500  | C | 2.88117300  | 0.61171500  | 0.18162200  |
| C        | -2.70106000 | -0.67163000 | -0.80697300 | C | 2.01577700  | -0.12184400 | -0.60774800 |
| C        | -3.43095900 | -1.81627900 | -0.46020900 | H | 4.83309800  | -3.10973100 | -1.37288900 |
| C        | -2.80966600 | -0.17656900 | -2.11033500 | H | 7.01172100  | -2.68203500 | -0.25132000 |
| C        | -4.24295800 | -2.45410700 | -1.39362400 | H | 7.35080300  | -0.65584800 | 1.12557800  |
| H        | -3.34696900 | -2.21561300 | 0.54459900  | H | 5.52827700  | 0.99369400  | 1.43182800  |
| C        | -3.62318400 | -0.81569500 | -3.04834800 | H | 2.21060300  | -2.00899900 | -1.55600700 |
| H        | -2.24961200 | 0.70649800  | -2.39753800 | N | 2.67589500  | -1.25141900 | -1.08095000 |
| C        | -4.34106300 | -1.95693900 | -2.69450400 | C | 2.62418000  | 1.87892800  | 0.94830600  |
| H        | -4.79388500 | -3.34463400 | -1.10685500 | H | 3.58170300  | 2.31530200  | 1.25173800  |
| H        | -3.69525400 | -0.41622200 | -4.05551800 | H | 2.11888000  | 2.63019700  | 0.33834400  |
| H        | -4.97348600 | -2.45380200 | -3.42381900 | C | 1.79825000  | 1.65664600  | 2.21444900  |

|   |            |            |            |
|---|------------|------------|------------|
| H | 2.25084100 | 0.84708500 | 2.81035200 |
| H | 0.78306500 | 1.34127700 | 1.93567900 |
| O | 1.76785600 | 2.88305500 | 2.93742000 |
| H | 1.15218000 | 2.77645400 | 3.67288000 |

**TS-1S**

|   |             |             |             |
|---|-------------|-------------|-------------|
| C | -2.46862200 | -3.63438700 | -0.03985500 |
| C | -3.06799100 | -2.48387400 | -0.53407500 |
| C | -2.33873900 | -1.63224000 | -1.36754900 |
| C | -1.02501300 | -1.93846500 | -1.71003100 |
| C | -0.43045300 | -3.09095900 | -1.19601100 |
| C | -1.13850600 | -3.95108200 | -0.35398000 |
| H | -3.02863700 | -4.28518500 | 0.62482400  |
| H | -4.08626100 | -2.22993300 | -0.26310400 |
| H | -0.47471800 | -1.27707100 | -2.36751400 |
| H | 0.60362000  | -3.31290600 | -1.44246500 |
| C | -0.49345700 | -5.18297900 | 0.22687700  |
| H | 0.55671600  | -5.26033300 | -0.06632400 |
| H | -0.54074500 | -5.16507900 | 1.32125400  |
| H | -1.00323100 | -6.09481000 | -0.10389400 |
| S | -3.13026100 | -0.14928800 | -1.99307200 |
| O | -1.97637100 | 0.64648700  | -2.60516300 |
| H | -0.81770500 | 1.02663500  | -1.99394400 |
| O | -4.11859400 | -0.53637000 | -3.00258700 |
| O | -3.68748400 | 0.54998500  | -0.79474600 |
| C | -0.71452000 | -1.23703800 | 1.98251600  |
| C | -1.94894700 | -0.53900000 | 1.89419900  |
| C | -3.12399000 | -1.03525100 | 2.47798400  |
| C | -3.02761900 | -2.22291800 | 3.18175400  |
| C | -1.80038500 | -2.92181500 | 3.30098800  |
| C | -0.64971900 | -2.44768600 | 2.69910600  |
| C | 0.24262500  | -0.50127400 | 1.21391700  |
| C | -0.41896500 | 0.66669100  | 0.75881700  |
| H | -4.06431800 | -0.50676100 | 2.36960900  |
| H | -3.91517700 | -2.63468500 | 3.65207200  |
| H | -1.77326100 | -3.84907900 | 3.86424400  |
| H | 0.28234500  | -2.99941700 | 2.76694700  |
| H | -2.52242300 | 1.00194400  | 0.63349700  |
| N | -1.75288200 | 0.61077600  | 1.18156500  |
| C | 0.14369700  | 1.85844700  | 0.16541500  |
| C | 1.61744400  | 2.07941200  | 0.41509200  |
| C | 2.53694400  | 2.39903300  | -0.58627400 |
| C | 2.05832200  | 2.02926600  | 1.74609400  |

|   |             |             |             |
|---|-------------|-------------|-------------|
| C | 3.87866000  | 2.61069000  | -0.27203700 |
| H | 2.22617900  | 2.42500100  | -1.62123400 |
| C | 3.39534600  | 2.25688900  | 2.05960800  |
| H | 1.35008200  | 1.79310000  | 2.53191300  |
| C | 4.31497700  | 2.53745500  | 1.04897900  |
| H | 4.58492100  | 2.82022700  | -1.06880900 |
| H | 3.71827800  | 2.20408200  | 3.09458200  |
| H | 5.36136900  | 2.69571100  | 1.28899700  |
| C | -0.67312500 | 3.12344700  | 0.15571300  |
| C | -1.93513600 | 3.19035600  | -0.46142000 |
| C | -0.17400600 | 4.27180200  | 0.79343100  |
| C | -2.67885600 | 4.36532300  | -0.41799300 |
| H | -2.34368200 | 2.34190600  | -0.99394300 |
| C | -0.92849800 | 5.44224600  | 0.83921000  |
| H | 0.79954000  | 4.24792100  | 1.26524900  |
| C | -2.18350500 | 5.49459200  | 0.23528900  |
| H | -3.64899600 | 4.39030100  | -0.90321500 |
| H | -0.52768000 | 6.31493900  | 1.34503200  |
| H | -2.76808700 | 6.40870600  | 0.26733900  |
| O | 0.13360600  | 1.46209500  | -1.70877600 |
| H | 0.11034200  | 2.32857400  | -2.14515700 |
| C | 1.58660300  | -0.96663700 | 0.94575700  |
| H | 2.06690100  | -1.52882600 | 1.74368900  |
| C | 2.21581200  | -0.81164700 | -0.23674900 |
| H | 1.66832500  | -0.33860200 | -1.04636500 |
| C | 3.58039100  | -1.21658000 | -0.55450900 |
| C | 4.52436000  | -1.56273800 | 0.43006700  |
| C | 3.98513100  | -1.23706600 | -1.90089000 |
| C | 5.81497700  | -1.93768500 | 0.07547700  |
| H | 4.24882300  | -1.51162500 | 1.47822500  |
| C | 5.27790900  | -1.61212900 | -2.25597100 |
| H | 3.26886300  | -0.95862500 | -2.66895700 |
| C | 6.19787200  | -1.96717900 | -1.26881900 |
| H | 6.53129500  | -2.19840100 | 0.84879700  |
| H | 5.56838400  | -1.62583000 | -3.30199500 |
| H | 7.20792000  | -2.25640800 | -1.54173400 |

**INT-1S**

|   |             |             |             |
|---|-------------|-------------|-------------|
| C | -3.15613300 | -3.16192000 | -0.26448500 |
| C | -3.54022500 | -1.89890200 | -0.69530600 |
| C | -2.61768200 | -1.08231600 | -1.35520100 |
| C | -1.32667800 | -1.54164100 | -1.59805300 |
| C | -0.95302900 | -2.81327200 | -1.15943900 |

|   |             |             |             |                   |             |             |             |
|---|-------------|-------------|-------------|-------------------|-------------|-------------|-------------|
| C | -1.85348700 | -3.63669800 | -0.48155100 | H                 | -1.57601900 | 2.54299000  | -0.89049600 |
| H | -3.87001400 | -3.78813500 | 0.26386200  | C                 | 0.29244800  | 5.59093700  | 0.60717100  |
| H | -4.54578900 | -1.53463700 | -0.51660500 | H                 | 1.62510300  | 4.17063100  | 1.50609800  |
| H | -0.61610200 | -0.90811700 | -2.11268700 | C                 | -0.83928800 | 5.77219400  | -0.19394500 |
| H | 0.06118100  | -3.15995800 | -1.33635800 | H                 | -2.37346600 | 4.79043600  | -1.35594900 |
| C | -1.44203000 | -4.99426100 | 0.02847000  | H                 | 0.81774500  | 6.44957300  | 1.01303700  |
| H | -0.40501500 | -5.22124800 | -0.23303700 | H                 | -1.19054000 | 6.77503500  | -0.41741800 |
| H | -1.53439800 | -5.04488300 | 1.11975500  | O                 | 0.79921600  | 1.06727400  | -2.35319400 |
| H | -2.07452000 | -5.78760400 | -0.38486800 | H                 | 0.97864800  | 1.16928200  | -3.29572200 |
| S | -3.12744800 | 0.56796600  | -1.86358100 | C                 | 1.34114900  | -1.28976800 | 1.06595000  |
| O | -1.89744600 | 1.17635700  | -2.47331000 | H                 | 1.65307000  | -2.09591500 | 1.72482100  |
| H | -0.18455700 | 1.12935300  | -2.30611600 | C                 | 1.96380300  | -1.07882900 | -0.11928100 |
| O | -4.25750400 | 0.40545500  | -2.78694300 | H                 | 1.53458700  | -0.34626500 | -0.79794600 |
| O | -3.50201800 | 1.27077300  | -0.58047300 | C                 | 3.14404100  | -1.75458500 | -0.62400300 |
| C | -0.97569700 | -1.15525400 | 2.06842000  | C                 | 3.94627000  | -2.61249800 | 0.15294500  |
| C | -2.06566800 | -0.24568800 | 1.89934900  | C                 | 3.50992700  | -1.51627000 | -1.96292400 |
| C | -3.36351200 | -0.56649600 | 2.33357300  | C                 | 5.06895100  | -3.21716800 | -0.39738800 |
| C | -3.53178300 | -1.77825700 | 2.97223300  | H                 | 3.69606500  | -2.78942100 | 1.19396000  |
| C | -2.45596700 | -2.69014800 | 3.16640400  | C                 | 4.63400300  | -2.12448000 | -2.51200400 |
| C | -1.19213200 | -2.40040700 | 2.70417600  | H                 | 2.89174800  | -0.84800000 | -2.55462200 |
| C | 0.14338000  | -0.58311500 | 1.41744300  | C                 | 5.41615800  | -2.97748700 | -1.73148900 |
| C | -0.25792900 | 0.75983400  | 1.01429800  | H                 | 5.68205900  | -3.87398600 | 0.21195200  |
| H | -4.18678200 | 0.11350700  | 2.15157400  | H                 | 4.90231100  | -1.93426100 | -3.54648000 |
| H | -4.51945700 | -2.05571200 | 3.32737100  | H                 | 6.29518700  | -3.45185300 | -2.15657900 |
| H | -2.64784800 | -3.63111500 | 3.67089400  |                   |             |             |             |
| H | -0.37730800 | -3.10662000 | 2.82408400  |                   |             |             |             |
| H | -2.30571600 | 1.37102400  | 0.64543500  |                   |             |             |             |
| N | -1.63557200 | 0.88194400  | 1.27473400  | <b>(S)-INT-2S</b> |             |             |             |
| C | 0.56417200  | 1.84770000  | 0.73180300  | C                 | 5.52495000  | -0.16002200 | -0.00656200 |
| C | 2.03059800  | 1.75118600  | 0.92777400  | C                 | 4.74778800  | 0.97522600  | -0.23193500 |
| C | 2.89377000  | 2.08600700  | -0.12527700 | C                 | 3.48791000  | 1.07356300  | 0.35492400  |
| C | 2.56371800  | 1.36387300  | 2.16482900  | C                 | 3.02329200  | 0.05526600  | 1.18876900  |
| C | 4.27041700  | 1.96805500  | 0.04298500  | C                 | 3.80579800  | -1.07314000 | 1.40757000  |
| H | 2.46174800  | 2.35927400  | -1.08098400 | C                 | 5.06283700  | -1.20534800 | 0.80295200  |
| C | 3.94225000  | 1.27465700  | 2.33555800  | H                 | 6.50748700  | -0.23740800 | -0.46511200 |
| H | 1.89114800  | 1.13147100  | 2.98364500  | H                 | 5.10912700  | 1.78966100  | -0.85048200 |
| C | 4.79784400  | 1.56294600  | 1.27078800  | H                 | 2.06013100  | 0.17062700  | 1.66938000  |
| H | 4.93406000  | 2.18795200  | -0.78724100 | H                 | 3.43511700  | -1.86804700 | 2.04955000  |
| H | 4.34887300  | 0.97855200  | 3.29749400  | C                 | 5.88896000  | -2.44733400 | 1.02475000  |
| H | 5.87230800  | 1.47702400  | 1.39898400  | H                 | 6.12943300  | -2.58416800 | 2.08491500  |
| C | 0.06251600  | 3.17766600  | 0.38690100  | H                 | 5.34536300  | -3.34253500 | 0.70097300  |
| C | -1.07035500 | 3.37621300  | -0.42540700 | H                 | 6.83075500  | -2.40632000 | 0.47120400  |
| C | 0.74997600  | 4.31002500  | 0.88275300  | S                 | 2.42692800  | 2.47697300  | -0.03326000 |
| C | -1.50848400 | 4.66345000  | -0.71379400 | O                 | 1.42855900  | 2.50620300  | 1.07544500  |
|   |             |             |             | O                 | 3.31075100  | 3.64765300  | -0.14244500 |





|                   |             |             |             |   |             |             |             |
|-------------------|-------------|-------------|-------------|---|-------------|-------------|-------------|
| C                 | 2.20898300  | 0.38411100  | -0.35649800 | C | 2.23322700  | -1.54159300 | 0.11833700  |
| C                 | 3.26283800  | 1.40591400  | -0.59486400 | C | 2.67231900  | -1.54349500 | -1.20213100 |
| C                 | 4.58323000  | 1.24555800  | -0.13430600 | C | 3.91843000  | -1.00668000 | -1.55140600 |
| C                 | 2.94665900  | 2.56458500  | -1.32269900 | H | 5.71991600  | -0.11107300 | -0.78634500 |
| C                 | 5.54671200  | 2.21462900  | -0.38381300 | H | 4.93911700  | -0.08505100 | 1.57890200  |
| H                 | 4.83745100  | 0.36610500  | 0.44760400  | H | 1.27396900  | -1.96516200 | 0.39022500  |
| C                 | 3.91534300  | 3.53726100  | -1.57076600 | H | 2.03836400  | -1.96335700 | -1.97784100 |
| H                 | 1.94228600  | 2.68888200  | -1.71144900 | C | 4.34596400  | -0.92938300 | -2.99295700 |
| C                 | 5.21624300  | 3.36831900  | -1.10279600 | H | 5.43049800  | -1.02292200 | -3.09716100 |
| H                 | 6.55601400  | 2.07842400  | -0.00764000 | H | 3.87300200  | -1.70900400 | -3.59621600 |
| H                 | 3.64977200  | 4.42449800  | -2.13706200 | H | 4.05585200  | 0.04029000  | -3.41492900 |
| H                 | 5.96999000  | 4.12541700  | -1.29463100 | S | 2.43375700  | -0.81003600 | 2.76781500  |
| C                 | 2.44721200  | -1.00391700 | -0.70733600 | O | 1.38007800  | -1.81109500 | 2.95263000  |
| C                 | 1.45250700  | -1.96480600 | -0.43290400 | O | 3.56136300  | -0.73984900 | 3.68842600  |
| C                 | 3.64910500  | -1.44485000 | -1.31239200 | O | 1.78793500  | 0.66565500  | 2.75723500  |
| C                 | 1.64819400  | -3.30754200 | -0.72768800 | C | 1.17046000  | 1.78399600  | -1.72254600 |
| H                 | 0.51689900  | -1.66696200 | 0.01159700  | C | 1.53760100  | 1.79193400  | -0.34861600 |
| C                 | 3.84463400  | -2.78817200 | -1.59660600 | C | 2.76479200  | 2.28455500  | 0.06608800  |
| H                 | 4.40880100  | -0.72570700 | -1.58928700 | C | 3.64010300  | 2.76115800  | -0.91740200 |
| C                 | 2.84846600  | -3.72619200 | -1.29976100 | C | 3.29601800  | 2.74234500  | -2.27273900 |
| H                 | 0.84662800  | -4.00592100 | -0.52039300 | C | 2.05263500  | 2.25283300  | -2.68953600 |
| H                 | 4.76790100  | -3.10711600 | -2.07027200 | C | -0.17405300 | 1.23037400  | -1.73007600 |
| H                 | 3.00523900  | -4.77498700 | -1.53335800 | C | -0.48591900 | 0.97211900  | -0.31669900 |
| C                 | 1.45959600  | 1.97644100  | 1.80024400  | H | 3.03185800  | 2.28742700  | 1.11592300  |
| H                 | 1.60805800  | 2.88104500  | 2.38897700  | H | 4.60837200  | 3.15044600  | -0.61915900 |
| C                 | 2.26612000  | 0.82879700  | 2.03948400  | H | 3.99775700  | 3.12020600  | -3.00941900 |
| H                 | 3.27958100  | 1.00852000  | 2.39862200  | H | 1.78302900  | 2.24918900  | -3.74118500 |
| C                 | 1.75221000  | -0.49815100 | 2.37122700  | H | 1.13502900  | 0.81631500  | 1.99245700  |
| C                 | 0.37741200  | -0.76928100 | 2.52554000  | N | 0.49602000  | 1.26287800  | 0.48617500  |
| C                 | 2.66096500  | -1.55615700 | 2.56379200  | C | -1.94474400 | 0.57859200  | -0.17319900 |
| C                 | -0.06356900 | -2.05104500 | 2.83377700  | C | -2.64888600 | 1.90259000  | 0.22518500  |
| H                 | -0.33767100 | 0.03703600  | 2.41016000  | C | -3.08486100 | 2.83884300  | -0.71709800 |
| C                 | 2.21546200  | -2.83675800 | 2.87686200  | C | -2.77866800 | 2.21081300  | 1.58584700  |
| H                 | 3.72446900  | -1.36604200 | 2.45052800  | C | -3.67190700 | 4.03832200  | -0.31174800 |
| C                 | 0.85102400  | -3.09321200 | 3.00777000  | H | -2.95865800 | 2.65337100  | -1.77764500 |
| H                 | -1.12681100 | -2.24120500 | 2.93907400  | C | -3.35764600 | 3.41057300  | 1.99114100  |
| H                 | 2.93580900  | -3.63817800 | 3.00729500  | H | -2.42963400 | 1.50213000  | 2.32780200  |
| H                 | 0.50033500  | -4.09247100 | 3.24314500  | C | -3.81328400 | 4.32820900  | 1.04367400  |
|                   |             |             |             | H | -4.01195500 | 4.74707800  | -1.06066200 |
|                   |             |             |             | H | -3.45263800 | 3.62678800  | 3.05070400  |
|                   |             |             |             | H | -4.26777600 | 5.26208800  | 1.35929000  |
|                   |             |             |             | C | -2.30960800 | -0.52264100 | 0.80681500  |
|                   |             |             |             | C | -1.36193400 | -1.18682400 | 1.57935000  |
|                   |             |             |             | C | -3.65687100 | -0.89140300 | 0.92305400  |
| <b>(S)-INT-3S</b> |             |             |             |   |             |             |             |
| C                 | 4.74091300  | -0.50743500 | -0.53382000 |   |             |             |             |
| C                 | 4.31318500  | -0.48599200 | 0.78983200  |   |             |             |             |
| C                 | 3.04938700  | -0.98285100 | 1.10145000  |   |             |             |             |



|   |            |             |             |
|---|------------|-------------|-------------|
| C | 6.00505500 | -1.91787900 | -0.48283000 |
| H | 4.52916500 | -1.86907600 | 1.07090700  |
| C | 5.35717900 | -0.96651700 | -2.60743700 |
| H | 3.35276600 | -0.19124200 | -2.71095800 |
| C | 6.31486900 | -1.58977600 | -1.80661000 |
| H | 6.75113000 | -2.39338400 | 0.14627700  |
| H | 5.59159400 | -0.70507600 | -3.63448100 |
| H | 7.29838100 | -1.81442100 | -2.20689000 |

**(R)-TS-2S**

|   |             |             |             |
|---|-------------|-------------|-------------|
| C | 3.95478600  | -1.60178000 | 1.36824000  |
| C | 4.14496300  | -0.38610200 | 0.71877100  |
| C | 3.26840900  | 0.67291900  | 0.95549200  |
| C | 2.24563500  | 0.52751700  | 1.89221300  |
| C | 2.05215500  | -0.69959700 | 2.52664200  |
| C | 2.88915200  | -1.78783600 | 2.25852000  |
| H | 4.63239400  | -2.42684700 | 1.16897100  |
| H | 4.96941100  | -0.24149500 | 0.03058600  |
| H | 1.63699600  | 1.38744100  | 2.14524400  |
| H | 1.24879100  | -0.81003300 | 3.25089400  |
| C | 2.64585000  | -3.13273400 | 2.89366100  |
| H | 1.96440000  | -3.05831900 | 3.74554600  |
| H | 2.20218100  | -3.82840100 | 2.17017500  |
| H | 3.57817600  | -3.58709000 | 3.24313700  |
| S | 3.44081000  | 2.20559900  | 0.01268400  |
| O | 2.75888800  | 3.22978900  | 0.83485000  |
| O | 4.88186700  | 2.37242900  | -0.22701200 |
| O | 2.69312000  | 1.93144900  | -1.29339500 |
| C | 1.23152200  | -2.21584700 | -0.87660200 |
| C | 1.88530900  | -1.14022000 | -1.52841500 |
| C | 3.13600100  | -1.27352900 | -2.11893600 |
| C | 3.73135700  | -2.53242500 | -2.05849000 |
| C | 3.10436400  | -3.61051800 | -1.41158800 |
| C | 1.85769000  | -3.46198500 | -0.80669100 |
| C | 0.00765800  | -1.64248400 | -0.35311500 |
| C | -0.06562000 | -0.28951900 | -0.87635400 |
| H | 3.62229700  | -0.41941000 | -2.57518500 |
| H | 4.70824200  | -2.67828200 | -2.50783300 |
| H | 3.60161100  | -4.57445300 | -1.38093300 |
| H | 1.38039700  | -4.29850500 | -0.30649000 |
| H | 1.59539200  | 0.98257400  | -1.52875600 |
| N | 1.07908600  | 0.01772000  | -1.48866100 |
| C | -1.33316400 | 0.42321200  | -0.73118100 |

|   |             |             |             |
|---|-------------|-------------|-------------|
| C | -2.46779600 | -0.20731100 | -1.47691100 |
| C | -3.80539300 | 0.05874300  | -1.13110700 |
| C | -2.21807200 | -1.07306100 | -2.55538900 |
| C | -4.85189400 | -0.52857400 | -1.83537000 |
| H | -4.02366500 | 0.71430400  | -0.29830200 |
| C | -3.26823800 | -1.66420900 | -3.25432200 |
| H | -1.19753300 | -1.26554700 | -2.86615700 |
| C | -4.58908800 | -1.39639300 | -2.89623300 |
| H | -5.87531300 | -0.31490800 | -1.54413600 |
| H | -3.05100500 | -2.32469300 | -4.08776700 |
| H | -5.40726300 | -1.85372500 | -3.44361700 |
| C | -1.32089700 | 1.89061200  | -0.56280000 |
| C | -0.25599500 | 2.49233800  | 0.12951200  |
| C | -2.30787500 | 2.72855200  | -1.12105300 |
| C | -0.17194500 | 3.87108000  | 0.27632100  |
| H | 0.53522500  | 1.88147100  | 0.53745700  |
| C | -2.23539900 | 4.10776900  | -0.95848600 |
| H | -3.10897400 | 2.30674200  | -1.71280500 |
| C | -1.17319800 | 4.68324100  | -0.25769700 |
| H | 0.69978900  | 4.28086600  | 0.77139200  |
| H | -3.00092400 | 4.73720900  | -1.40156800 |
| H | -1.11478200 | 5.76172100  | -0.14816500 |
| C | -0.90051000 | -1.85602200 | 0.65024400  |
| H | -1.11558900 | -2.83202100 | 1.07795400  |
| C | -1.55835600 | -0.65854000 | 1.13176800  |
| H | -0.88545900 | 0.08408400  | 1.54808500  |
| C | -2.89226900 | -0.66446900 | 1.70883300  |
| C | -3.81298700 | -1.68666500 | 1.41609100  |
| C | -3.30752900 | 0.41521000  | 2.51059400  |
| C | -5.10226800 | -1.64572800 | 1.93675400  |
| H | -3.51888700 | -2.49718500 | 0.75681800  |
| C | -4.60214400 | 0.46289900  | 3.01506900  |
| H | -2.60633500 | 1.21757000  | 2.72116600  |
| C | -5.50092500 | -0.57060400 | 2.73371600  |
| H | -5.80339300 | -2.44150300 | 1.70634500  |
| H | -4.91269400 | 1.30149600  | 3.62994600  |
| H | -6.51078200 | -0.53366700 | 3.12992600  |

**(R)-INT-3S**

|   |             |             |             |
|---|-------------|-------------|-------------|
| C | -4.98702500 | 0.81291200  | 0.00709700  |
| C | -4.57126400 | -0.31361300 | -0.69654000 |
| C | -3.44799900 | -1.01054500 | -0.25358900 |
| C | -2.76716300 | -0.62276200 | 0.89883700  |



|   |             |             |             |              |             |             |             |
|---|-------------|-------------|-------------|--------------|-------------|-------------|-------------|
| C | -2.06261600 | 3.85583100  | 0.48095900  | H            | -2.26304400 | -0.68257500 | -2.90437500 |
| C | -2.17367100 | 5.19382300  | 0.83137600  | C            | -1.18996200 | -4.05678200 | -1.33162200 |
| C | -1.26092200 | 6.07575600  | 0.24802900  | H            | -0.73551500 | -2.91806200 | 0.43358900  |
| C | -0.27520500 | 5.62454900  | -0.64162300 | C            | -1.63032500 | -4.01320400 | -2.65456900 |
| C | -0.16930900 | 4.27663700  | -0.98527800 | H            | -2.34637800 | -2.75378400 | -4.25349200 |
| C | -1.28008800 | 1.94100700  | -0.49345300 | H            | -0.86241600 | -4.99241100 | -0.89082300 |
| C | -2.37508700 | 1.63446500  | 0.35287900  | H            | -1.66551900 | -4.92226000 | -3.24703500 |
| H | -2.92766400 | 5.54139200  | 1.52953400  | C            | 2.99113800  | 0.86717700  | -2.00971400 |
| H | -1.31321200 | 7.13034000  | 0.49695600  | C            | 2.53750500  | 1.41079700  | -0.77015800 |
| H | 0.42411500  | 6.33723300  | -1.06546100 | C            | 2.86948200  | 2.70102900  | -0.35550600 |
| H | 0.61452700  | 3.92856600  | -1.64805900 | C            | 3.66328900  | 3.46752000  | -1.20639000 |
| H | -3.58749800 | 2.77454200  | 1.59771200  | C            | 4.10935800  | 2.95678400  | -2.44126300 |
| N | -2.83107400 | 2.74563000  | 0.92597400  | C            | 3.78113400  | 1.66643400  | -2.84828800 |
| C | -2.76433400 | 0.19245200  | 0.36575500  | C            | 2.50377500  | -0.49701500 | -2.07980500 |
| C | -3.93986000 | -0.07027300 | -0.58853200 | C            | 1.80359300  | -0.70804000 | -0.92651700 |
| C | -4.55035600 | -1.33025400 | -0.55367200 | H            | 2.52899400  | 3.08624900  | 0.60028200  |
| C | -4.36931500 | 0.86536800  | -1.53293400 | H            | 3.94673100  | 4.47294500  | -0.91001600 |
| C | -5.56266700 | -1.64920300 | -1.45224000 | H            | 4.72712100  | 3.58011500  | -3.08057000 |
| H | -4.21440100 | -2.06392900 | 0.16992500  | H            | 4.14143500  | 1.27924900  | -3.79678000 |
| C | -5.38779800 | 0.54509400  | -2.43403900 | H            | 1.53088700  | 0.36278600  | 0.83216400  |
| H | -3.91220000 | 1.84795000  | -1.58452400 | N            | 1.76468600  | 0.44466300  | -0.15513400 |
| C | -5.98496000 | -0.71251600 | -2.39809500 | H            | 1.32899400  | -1.59738900 | -0.55537300 |
| H | -6.01699800 | -2.63415700 | -1.41858300 | C            | 2.77190600  | -1.53498900 | -3.12794700 |
| H | -5.71132400 | 1.28370000  | -3.16085500 | H            | 2.36905200  | -1.21599900 | -4.10089700 |
| H | -6.77469200 | -0.96231200 | -3.09946700 | H            | 3.85593200  | -1.64370800 | -3.26727900 |
| C | -3.11134000 | -0.22982200 | 1.79825600  | C            | 2.18958600  | -2.91729600 | -2.78933300 |
| C | -2.21098800 | -0.87881800 | 2.64602400  | H            | 2.32754100  | -3.56843400 | -3.66186100 |
| C | -4.37090000 | 0.14575900  | 2.29901200  | H            | 1.10799500  | -2.83035800 | -2.62348000 |
| C | -2.57216300 | -1.15762800 | 3.96721000  | O            | 2.83723500  | -3.53869400 | -1.69136200 |
| H | -1.21673100 | -1.16483300 | 2.32041700  | H            | 2.31434400  | -3.44704500 | -0.87515900 |
| C | -4.72017000 | -0.12289600 | 3.61993800  |              |             |             |             |
| H | -5.09394000 | 0.61618000  | 1.63818800  |              |             |             |             |
| C | -3.81886300 | -0.78093000 | 4.46024400  | <b>TS-3A</b> |             |             |             |
| H | -1.85644400 | -1.67016100 | 4.60218000  | C            | 4.48936700  | 1.07142300  | 2.28564600  |
| H | -5.69961400 | 0.16819000  | 3.98751100  | C            | 3.44591500  | 0.19476900  | 2.56310100  |
| H | -4.09184700 | -1.00035600 | 5.48777400  | C            | 3.32923300  | -0.99406600 | 1.83760200  |
| C | -0.77605800 | 0.76076900  | -0.98261100 | C            | 4.26786500  | -1.31740500 | 0.86116300  |
| H | -0.03634100 | 0.64083000  | -1.76188400 | C            | 5.30644600  | -0.42586600 | 0.59285000  |
| C | -1.41696600 | -0.41562600 | -0.30340300 | C            | 5.42761700  | 0.78245300  | 1.28502900  |
| H | -0.72965700 | -0.64498300 | 0.52703300  | H            | 4.57312400  | 2.00062200  | 2.84324600  |
| C | -1.52322000 | -1.66631800 | -1.13341200 | H            | 2.70996000  | 0.43299300  | 3.32356000  |
| C | -1.95371700 | -1.62690500 | -2.46571800 | H            | 4.17064900  | -2.22848800 | 0.28510300  |
| C | -1.13719500 | -2.88834800 | -0.57215100 | H            | 6.02517700  | -0.66928500 | -0.18490600 |
| C | -2.00947200 | -2.79432500 | -3.22226000 | C            | 6.50719100  | 1.77209000  | 0.92903200  |

|   |             |             |             |               |             |             |             |
|---|-------------|-------------|-------------|---------------|-------------|-------------|-------------|
| H | 6.16002800  | 2.44406500  | 0.13538700  | C             | -0.80612600 | 0.61434500  | -1.03148300 |
| H | 6.78592300  | 2.38943600  | 1.78816500  | H             | -0.29024600 | 0.45283500  | -1.96688800 |
| H | 7.40701700  | 1.26868500  | 0.56365300  | C             | -1.46984900 | -0.51568200 | -0.26222600 |
| S | 1.88402600  | -2.02863500 | 2.13142900  | H             | -0.80998500 | -0.71233300 | 0.58723200  |
| O | 1.94488200  | -2.54261200 | 3.50693600  | C             | -1.59761600 | -1.81426600 | -1.01363500 |
| O | 0.75030500  | -1.02587900 | 1.93967500  | C             | -2.08024600 | -1.86590400 | -2.32745200 |
| O | 1.87262500  | -3.06323800 | 1.05427200  | C             | -1.14948200 | -2.99118200 | -0.40226600 |
| C | -1.13631700 | 3.27738200  | -0.65106600 | C             | -2.11980800 | -3.07517200 | -3.01646300 |
| C | -2.13444900 | 3.81578600  | 0.20847500  | H             | -2.43745500 | -0.95969000 | -2.80734600 |
| C | -2.28951400 | 5.18186200  | 0.41282000  | C             | -1.18425900 | -4.20152800 | -1.09471400 |
| C | -1.41800900 | 6.02811100  | -0.27230100 | H             | -0.71321900 | -2.94996700 | 0.58975900  |
| C | -0.42574600 | 5.51852000  | -1.12502100 | C             | -1.67165900 | -4.24645800 | -2.40106200 |
| C | -0.27125700 | 4.14778500  | -1.31905400 | H             | -2.49716500 | -3.10379600 | -4.03406900 |
| C | -1.29136900 | 1.83600600  | -0.56881000 | H             | -0.81038100 | -5.10045200 | -0.61573900 |
| C | -2.37151500 | 1.58674600  | 0.29353500  | H             | -1.69426300 | -5.18746000 | -2.94214600 |
| H | -3.05352300 | 5.57463500  | 1.07550000  | C             | 3.01172600  | 0.68743700  | -1.87992600 |
| H | -1.50836400 | 7.10103000  | -0.13921500 | C             | 2.27190900  | 1.23485900  | -0.80015000 |
| H | 0.23716300  | 6.20666700  | -1.63879000 | C             | 2.48675800  | 2.52235900  | -0.32401900 |
| H | 0.51404200  | 3.76034500  | -1.95720900 | C             | 3.45736100  | 3.29218900  | -0.96782000 |
| H | -3.65154000 | 2.81602000  | 1.39332100  | C             | 4.18647100  | 2.77724700  | -2.05215400 |
| N | -2.86956900 | 2.74112000  | 0.75743300  | C             | 3.97521300  | 1.47694200  | -2.51346900 |
| C | -2.79843800 | 0.15468600  | 0.37377400  | C             | 2.58622100  | -0.69953700 | -2.02958000 |
| C | -3.98663700 | -0.11906200 | -0.56012500 | C             | 1.64205400  | -0.91497700 | -1.07806000 |
| C | -4.63529700 | -1.35721400 | -0.46649400 | H             | 1.92682600  | 2.90943200  | 0.52000800  |
| C | -4.39107800 | 0.78197700  | -1.54877700 | H             | 3.65489100  | 4.30107900  | -0.61970500 |
| C | -5.66027600 | -1.68818000 | -1.34648500 | H             | 4.93492500  | 3.40021400  | -2.53235700 |
| H | -4.31991500 | -2.06578400 | 0.29075900  | H             | 4.55905400  | 1.08194700  | -3.33905600 |
| C | -5.42135800 | 0.44997600  | -2.43207800 | H             | 1.15979600  | 0.10204400  | 0.64954500  |
| H | -3.90321400 | 1.74559100  | -1.64838200 | N             | 1.37231600  | 0.25896200  | -0.35246200 |
| C | -6.05723500 | -0.78545900 | -2.33515800 | H             | 1.13390800  | -1.81896600 | -0.79718100 |
| H | -6.14389700 | -2.65635900 | -1.26510700 | C             | 3.14741200  | -1.73827400 | -2.95065400 |
| H | -5.72413600 | 1.16245000  | -3.19323100 | H             | 2.85988300  | -1.52625500 | -3.99126800 |
| H | -6.85666400 | -1.04404000 | -3.02232000 | H             | 4.24372300  | -1.69032500 | -2.91904400 |
| C | -3.14119900 | -0.20082600 | 1.82607100  | C             | 2.71891800  | -3.17338300 | -2.59683800 |
| C | -2.23002000 | -0.78577800 | 2.70963400  | H             | 3.08166100  | -3.84020900 | -3.38790500 |
| C | -4.40417900 | 0.18327500  | 2.31066300  | H             | 1.62083600  | -3.24381000 | -2.60028200 |
| C | -2.58434100 | -0.99465500 | 4.04515800  | O             | 3.26867100  | -3.64058000 | -1.38096400 |
| H | -1.23124100 | -1.07243700 | 2.40092500  | H             | 2.68566300  | -3.43614200 | -0.62597900 |
| C | -4.74807200 | -0.01607700 | 3.64529600  |               |             |             |             |
| H | -5.13359200 | 0.61051500  | 1.62851800  |               |             |             |             |
| C | -3.83658500 | -0.61179200 | 4.51939200  | <b>INT-4B</b> |             |             |             |
| H | -1.86040400 | -1.45687900 | 4.70871200  | C             | -6.06704800 | -0.42626200 | -0.29128100 |
| H | -5.73085300 | 0.28232300  | 3.99788300  | C             | -4.77024500 | -0.87650400 | -0.05441900 |
| H | -4.10412400 | -0.77709100 | 5.55843600  | C             | -4.07018900 | -1.50321800 | -1.08658200 |

|   |             |             |             |   |             |             |             |
|---|-------------|-------------|-------------|---|-------------|-------------|-------------|
| C | -4.66041800 | -1.68931200 | -2.33574600 | C | 1.02659400  | -3.29198600 | -3.06580600 |
| C | -5.95833400 | -1.23479700 | -2.55489500 | H | 0.18562700  | -1.98702000 | -1.61331200 |
| C | -6.68029400 | -0.59594300 | -1.53887400 | C | 3.42334200  | -3.22865700 | -3.32238000 |
| H | -6.61406200 | 0.06203200  | 0.51078800  | H | 4.48313800  | -1.94653200 | -1.96197400 |
| H | -4.31867200 | -0.75136200 | 0.92319400  | C | 2.17964600  | -3.73636600 | -3.70822700 |
| H | -4.10320300 | -2.19728600 | -3.11491500 | H | 0.04363200  | -3.66752400 | -3.32986300 |
| H | -6.42077500 | -1.38044300 | -3.52773400 | H | 4.33001500  | -3.57186300 | -3.81177800 |
| C | -8.09766500 | -0.13410900 | -1.77024900 | H | 2.11648300  | -4.47604400 | -4.50047100 |
| H | -8.81751000 | -0.90665100 | -1.47280600 | C | 1.12731000  | 1.04979100  | 0.41903800  |
| H | -8.32536600 | 0.76284700  | -1.18675500 | H | 0.49980700  | 1.56704400  | 1.13430700  |
| H | -8.27803000 | 0.09030800  | -2.82553700 | C | 1.20725500  | -0.44699900 | 0.38259000  |
| S | -2.36786700 | -2.01321100 | -0.84713500 | H | 0.29623500  | -0.73877600 | -0.17069900 |
| O | -1.54019700 | -0.81645100 | -1.26182300 | C | 1.18903800  | -1.13049900 | 1.72294900  |
| O | -2.22748700 | -2.28255000 | 0.62006100  | C | 1.81161800  | -0.54829200 | 2.83367000  |
| O | -2.12642100 | -3.18387500 | -1.71580100 | C | 0.58284200  | -2.38394200 | 1.85449000  |
| C | 2.20894800  | 2.84784600  | -1.27468500 | C | 1.83414600  | -1.20891500 | 4.05888400  |
| C | 3.05949400  | 2.46134000  | -2.34348900 | H | 2.30124400  | 0.41611900  | 2.73236800  |
| C | 3.56076800  | 3.36279800  | -3.27002500 | C | 0.61007800  | -3.04712700 | 3.08085200  |
| C | 3.19401900  | 4.70153000  | -3.10740600 | H | 0.05171800  | -2.81963500 | 1.01727600  |
| C | 2.35909100  | 5.10572900  | -2.05705400 | C | 1.23637000  | -2.46451400 | 4.18295300  |
| C | 1.85632200  | 4.18867000  | -1.13230900 | H | 2.32015900  | -0.74767600 | 4.91292000  |
| C | 1.89802500  | 1.61590700  | -0.56073600 | H | 0.12345400  | -4.01238900 | 3.17552800  |
| C | 2.61448200  | 0.57255700  | -1.21231500 | H | 1.25070700  | -2.98123400 | 5.13761700  |
| H | 4.20582400  | 3.04802400  | -4.08332600 | C | -1.67700700 | 2.99658900  | 1.82096600  |
| H | 3.56431900  | 5.43955700  | -3.81100000 | C | -1.61222300 | 2.94766900  | 0.39088300  |
| H | 2.09403100  | 6.15334200  | -1.96204200 | C | -1.45212700 | 4.09860800  | -0.38482700 |
| H | 1.19349900  | 4.50492900  | -0.33569300 | C | -1.33840900 | 5.31700600  | 0.27983500  |
| H | 3.81964500  | 0.49399300  | -2.89736000 | C | -1.38154300 | 5.38649500  | 1.68736100  |
| N | 3.27157500  | 1.05606300  | -2.25783600 | C | -1.55246400 | 4.24214700  | 2.45838100  |
| C | 2.49018300  | -0.76260600 | -0.56480500 | C | -1.86566400 | 1.64017500  | 2.28512800  |
| C | 3.70075400  | -1.03140300 | 0.34710200  | C | -1.89729700 | 0.85601600  | 1.16091800  |
| C | 3.86626300  | -2.32169200 | 0.86661600  | H | -1.41796200 | 4.04295500  | -1.46867000 |
| C | 4.58141900  | -0.02296100 | 0.74577300  | H | -1.22160600 | 6.22984900  | -0.29696400 |
| C | 4.88065300  | -2.59018200 | 1.77887300  | H | -1.29082800 | 6.35322500  | 2.17340300  |
| H | 3.18358400  | -3.10781900 | 0.56777900  | H | -1.59701800 | 4.30917900  | 3.54154500  |
| C | 5.60461500  | -0.29513200 | 1.65707600  | H | -1.76060900 | 1.19125900  | -0.88789400 |
| H | 4.47638500  | 0.98700400  | 0.36366000  | N | -1.72347200 | 1.62347500  | 0.02820600  |
| C | 5.75410500  | -1.57683600 | 2.17973600  | H | -2.00054900 | -0.20784400 | 1.06506900  |
| H | 4.98457600  | -3.59214400 | 2.18251700  | C | -2.04426300 | 1.14131500  | 3.68961400  |
| H | 6.28084200  | 0.49995400  | 1.95544600  | H | -1.27850300 | 1.57703000  | 4.34770200  |
| H | 6.54524900  | -1.78754000 | 2.89227600  | H | -3.01285400 | 1.47572900  | 4.08653500  |
| C | 2.34692400  | -1.84735400 | -1.63754900 | C | -1.96581800 | -0.38709800 | 3.81719900  |
| C | 1.10864200  | -2.34032500 | -2.04767700 | H | -1.99925500 | -0.64714700 | 4.88436500  |
| C | 3.50855400  | -2.29614100 | -2.29086600 | H | -1.00250200 | -0.73136500 | 3.42977600  |



|              |             |             |             |   |             |             |             |
|--------------|-------------|-------------|-------------|---|-------------|-------------|-------------|
| O            | -3.04553200 | -1.04254000 | 3.16232500  | H | 4.38520100  | 1.33933900  | 0.37237300  |
| H            | -2.70757400 | -1.56624400 | 2.41605200  | C | 6.02575900  | -1.16296600 | 1.97234800  |
|              |             |             |             | H | 5.48533700  | -3.24924000 | 1.87830400  |
|              |             |             |             | H | 6.30328000  | 0.97049200  | 1.86190800  |
| <b>TS-3B</b> |             |             |             | H | 6.86835400  | -1.32324100 | 2.63770300  |
| C            | -5.91319800 | -0.18865500 | -0.52503800 | C | 2.49951000  | -1.59498000 | -1.72588900 |
| C            | -4.63577000 | -0.69386100 | -0.29741000 | C | 1.29355400  | -2.13153500 | -2.18063200 |
| C            | -3.97356000 | -1.35440600 | -1.33336900 | C | 3.68330900  | -1.93376400 | -2.40397500 |
| C            | -4.57851400 | -1.51541300 | -2.57832000 | C | 1.26684000  | -3.01362900 | -3.26146200 |
| C            | -5.85699500 | -1.00369300 | -2.78832800 | H | 0.34930300  | -1.85770200 | -1.73606600 |
| C            | -6.54254100 | -0.33283200 | -1.76833800 | C | 3.65517300  | -2.80064700 | -3.49470400 |
| H            | -6.43398800 | 0.32112200  | 0.28119000  | H | 4.63478100  | -1.54308000 | -2.05624400 |
| H            | -4.17871300 | -0.59779300 | 0.68093200  | C | 2.44532800  | -3.35168600 | -3.92288700 |
| H            | -4.04657600 | -2.04495700 | -3.36050100 | H | 0.30694300  | -3.41845300 | -3.56476700 |
| H            | -6.33191300 | -1.12922600 | -3.75783400 | H | 4.58177200  | -3.05502700 | -4.00093100 |
| C            | -7.94029300 | 0.18963500  | -1.98940600 | H | 2.42616600  | -4.03791700 | -4.76409600 |
| H            | -8.69018800 | -0.54662700 | -1.67488000 | C | 1.07985800  | 1.03111500  | 0.61718900  |
| H            | -8.12113700 | 1.10229100  | -1.41377500 | H | 0.90066500  | 1.43428800  | 1.60583700  |
| H            | -8.12251400 | 0.41018300  | -3.04508600 | C | 1.29771800  | -0.46880400 | 0.39969000  |
| S            | -2.29336100 | -1.93282500 | -1.10579100 | H | 0.44490600  | -0.80883000 | -0.19100100 |
| O            | -1.43120700 | -0.71485200 | -1.38039500 | C | 1.35468800  | -1.30042000 | 1.65456600  |
| O            | -2.18829100 | -2.36114400 | 0.32714700  | C | 2.01572200  | -0.85194400 | 2.80446200  |
| O            | -2.04734400 | -3.00412100 | -2.08881100 | C | 0.72990000  | -2.55253300 | 1.67329300  |
| C            | 2.04366600  | 3.05514300  | -0.93368000 | C | 2.05207000  | -1.63767700 | 3.95308400  |
| C            | 2.94050700  | 2.84232000  | -2.02119000 | H | 2.52653600  | 0.10608900  | 2.79507500  |
| C            | 3.44401400  | 3.88290300  | -2.79482100 | C | 0.76639900  | -3.34041800 | 2.82406300  |
| C            | 3.05323500  | 5.17644900  | -2.45506600 | H | 0.17395800  | -2.89212600 | 0.80650900  |
| C            | 2.18892700  | 5.41351500  | -1.37386800 | C | 1.42683000  | -2.88615400 | 3.96581800  |
| C            | 1.67786700  | 4.36671200  | -0.61123400 | H | 2.57119300  | -1.27795100 | 4.83615700  |
| C            | 1.75100400  | 1.73307100  | -0.40752800 | H | 0.26511100  | -4.30304100 | 2.82774700  |
| C            | 2.51020300  | 0.82461200  | -1.15006000 | H | 1.45117900  | -3.49827200 | 4.86223900  |
| H            | 4.11957000  | 3.69624200  | -3.62319400 | C | -2.03953900 | 2.42162300  | 2.08041600  |
| H            | 3.42859800  | 6.01381100  | -3.03390700 | C | -1.48977000 | 2.45502700  | 0.77563000  |
| H            | 1.91409800  | 6.43402000  | -1.12800200 | C | -1.44897600 | 3.61165300  | 0.01128600  |
| H            | 1.00472100  | 4.56140000  | 0.21470400  | C | -1.94569000 | 4.78298700  | 0.59159200  |
| H            | 3.83327000  | 1.01447100  | -2.75884100 | C | -2.46406600 | 4.77876800  | 1.89441100  |
| N            | 3.20132800  | 1.46278200  | -2.11098600 | C | -2.52062400 | 3.60381500  | 2.64706400  |
| C            | 2.57211600  | -0.56215300 | -0.59415000 | C | -2.01358200 | 1.02750200  | 2.52260300  |
| C            | 3.84094900  | -0.74795000 | 0.25464500  | C | -1.45636800 | 0.31403800  | 1.51703400  |
| C            | 4.17303000  | -2.03789800 | 0.69066800  | H | -1.05102800 | 3.60579100  | -0.99713500 |
| C            | 4.62101700  | 0.32842000  | 0.68595000  | H | -1.93540400 | 5.70574500  | 0.02044800  |
| C            | 5.25270100  | -2.24359100 | 1.54274500  | H | -2.84136500 | 5.70396400  | 2.31877700  |
| H            | 3.56769900  | -2.87824600 | 0.37200700  | H | -2.94622800 | 3.60622000  | 3.64556700  |
| C            | 5.70783600  | 0.12181000  | 1.53933700  | H | -1.20706600 | 0.70766200  | -0.47055100 |

|   |             |             |            |
|---|-------------|-------------|------------|
| N | -1.03822100 | 1.15352700  | 0.45566800 |
| H | -1.33185100 | -0.74675100 | 1.39746100 |
| C | -2.57742700 | 0.44556500  | 3.78129700 |
| H | -1.99130600 | 0.77588000  | 4.65126300 |
| H | -3.59515400 | 0.82871400  | 3.93137000 |
| C | -2.63088800 | -1.09139400 | 3.76473000 |
| H | -2.98060300 | -1.43199800 | 4.74748200 |
| H | -1.61879300 | -1.49577400 | 3.62656900 |
| O | -3.52975600 | -1.58331800 | 2.78643000 |
| H | -3.04557500 | -1.92903800 | 2.01470000 |

**INT-4C**

|   |             |             |             |
|---|-------------|-------------|-------------|
| C | 5.76662000  | 3.03154400  | 0.08407700  |
| C | 4.76700600  | 2.15308500  | 0.49201000  |
| C | 4.87805000  | 0.79842200  | 0.17992700  |
| C | 5.97387900  | 0.32252100  | -0.53685300 |
| C | 6.96707000  | 1.21341100  | -0.93837500 |
| C | 6.88289500  | 2.57669300  | -0.63098200 |
| H | 5.67913000  | 4.08896500  | 0.31949500  |
| H | 3.89597600  | 2.50758000  | 1.03106400  |
| H | 6.02933000  | -0.73146700 | -0.78428200 |
| H | 7.81986800  | 0.84572500  | -1.50276600 |
| C | 7.97733700  | 3.53106700  | -1.03917200 |
| H | 7.57883600  | 4.52529900  | -1.26189000 |
| H | 8.71513800  | 3.64905500  | -0.23609000 |
| H | 8.51218900  | 3.17205300  | -1.92296000 |
| S | 3.63012600  | -0.35669100 | 0.74178000  |
| O | 3.64566300  | -1.49247000 | -0.21582200 |
| O | 3.97725900  | -0.71796800 | 2.13731000  |
| O | 2.33892500  | 0.44065800  | 0.66074000  |
| C | -0.65798200 | -1.13982500 | -2.74516500 |
| C | 0.58005000  | -0.97972300 | -2.07717800 |
| C | 1.77857100  | -1.44393800 | -2.59846300 |
| C | 1.71019100  | -2.09783700 | -3.83395000 |
| C | 0.49433000  | -2.27298600 | -4.51085900 |
| C | -0.70280600 | -1.79417100 | -3.97335100 |
| C | -1.64647900 | -0.55359300 | -1.85727800 |
| C | -0.91948600 | -0.04575500 | -0.71472600 |
| H | 2.70271600  | -1.34476400 | -2.03821700 |
| H | 2.62431700  | -2.48224000 | -4.27487000 |
| H | 0.48383200  | -2.78718000 | -5.46642500 |
| H | -1.64415800 | -1.93534300 | -4.49360600 |
| H | 1.17204200  | -0.05669400 | -0.16845100 |

|   |             |             |             |
|---|-------------|-------------|-------------|
| N | 0.36060900  | -0.31307800 | -0.83248300 |
| C | -1.80234200 | 0.76502300  | 0.20299200  |
| C | -1.61890400 | 2.26391600  | -0.12498900 |
| C | -2.16434500 | 3.21266500  | 0.74933100  |
| C | -0.99789800 | 2.70728300  | -1.29601500 |
| C | -2.10771100 | 4.56928800  | 0.44923600  |
| H | -2.64548400 | 2.88183100  | 1.66184400  |
| C | -0.93405900 | 4.07032200  | -1.59326100 |
| H | -0.55437600 | 2.00277600  | -1.99001000 |
| C | -1.49304400 | 5.00517200  | -0.72609500 |
| H | -2.54458200 | 5.28745400  | 1.13590900  |
| H | -0.44069200 | 4.39493400  | -2.50408400 |
| H | -1.44443200 | 6.06443000  | -0.95808100 |
| C | -1.54939200 | 0.54279100  | 1.69698800  |
| C | -2.50972200 | 0.03658000  | 2.57717400  |
| C | -0.31410800 | 0.94895400  | 2.21924300  |
| C | -2.24458300 | -0.06070400 | 3.94499600  |
| H | -3.47529700 | -0.28883800 | 2.21688000  |
| C | -0.04239000 | 0.83715600  | 3.57934100  |
| H | 0.45365200  | 1.34733100  | 1.56791100  |
| C | -1.00984300 | 0.33754600  | 4.45163600  |
| H | -3.00833600 | -0.45308900 | 4.60933900  |
| H | 0.93445300  | 1.13045400  | 3.94848500  |
| H | -0.80017500 | 0.25401800  | 5.51314300  |
| C | -2.97052800 | -0.36449700 | -1.66315800 |
| H | -3.77096100 | -0.65521500 | -2.33216200 |
| C | -3.24976300 | 0.28114500  | -0.33037900 |
| H | -3.56952100 | -0.54131400 | 0.31684700  |
| C | -4.33979200 | 1.32586900  | -0.37463700 |
| C | -4.42701500 | 2.21607300  | -1.45287300 |
| C | -5.26644800 | 1.43867800  | 0.66591600  |
| C | -5.40438300 | 3.20657700  | -1.48094700 |
| H | -3.70297000 | 2.15081100  | -2.25872500 |
| C | -6.24605600 | 2.43119200  | 0.64252900  |
| H | -5.22044800 | 0.75272200  | 1.50531200  |
| C | -6.31549800 | 3.31994600  | -0.42965600 |
| H | -5.45033900 | 3.89439100  | -2.31941400 |
| H | -6.95509300 | 2.50735500  | 1.46102600  |
| H | -7.07547700 | 4.09483600  | -0.44739000 |
| C | -1.46903400 | -3.26719300 | 0.61507100  |
| C | -1.21865000 | -3.64205300 | -0.74198400 |
| C | -2.24747400 | -3.81639700 | -1.66871900 |
| C | -3.55066200 | -3.57957200 | -1.24144400 |
| C | -3.82536500 | -3.21738800 | 0.09568100  |

|   |             |             |             |   |             |             |             |
|---|-------------|-------------|-------------|---|-------------|-------------|-------------|
| C | -2.80097400 | -3.06977700 | 1.02320500  | C | 0.23251400  | -0.04331200 | 4.09012900  |
| C | -0.19681100 | -3.17746500 | 1.28164200  | C | -1.06399500 | -0.26227100 | 1.81001600  |
| C | 0.75827800  | -3.46721400 | 0.33239700  | C | -1.02422800 | -1.28147000 | 0.86752400  |
| H | -2.03442000 | -4.10646500 | -2.69238900 | H | 1.72311400  | -3.50129700 | 2.95433300  |
| H | -4.37291500 | -3.70457300 | -1.93966800 | H | 2.46979300  | -2.42078700 | 5.07558000  |
| H | -4.85640000 | -3.06553300 | 0.40206800  | H | 1.53198400  | -0.25086200 | 5.78683800  |
| H | -3.01991600 | -2.80987000 | 2.05358400  | H | -0.17359400 | 0.91141900  | 4.41125000  |
| H | 0.63326600  | -3.89159300 | -1.74612100 | H | 0.37395500  | -2.80738300 | 0.63320500  |
| N | 0.14451900  | -3.77114700 | -0.87363500 | N | -0.21628300 | -2.28832800 | 1.29013400  |
| H | 1.83192100  | -3.46990000 | 0.43855300  | C | -1.92156100 | -1.05784600 | -0.32984900 |
| C | 0.01822400  | -2.88808400 | 2.73945500  | C | -3.18761800 | -1.93215700 | -0.21918200 |
| H | -0.81251200 | -2.28100000 | 3.11364400  | C | -4.07038900 | -1.99507300 | -1.30452300 |
| H | -0.00020100 | -3.82750000 | 3.30962500  | C | -3.51727600 | -2.61727000 | 0.95312200  |
| C | 1.31782200  | -2.15657000 | 3.05692800  | C | -5.26523200 | -2.70097500 | -1.20981800 |
| H | 1.31515800  | -1.88198000 | 4.12547100  | H | -3.82060000 | -1.48097400 | -2.22552500 |
| H | 1.35474500  | -1.22389900 | 2.48694600  | C | -4.71005900 | -3.33720800 | 1.04486100  |
| O | 2.42741700  | -2.98006800 | 2.74451400  | H | -2.84958000 | -2.58950700 | 1.80606500  |
| H | 3.16945100  | -2.36720700 | 2.58528200  | C | -5.59205900 | -3.37573700 | -0.03193200 |

**TS-3C**

|   |             |             |             |   |             |             |             |
|---|-------------|-------------|-------------|---|-------------|-------------|-------------|
| C | 6.35794700  | -0.50817500 | -1.26856500 | H | -5.94140500 | -2.72669600 | -2.05885200 |
| C | 4.96914900  | -0.56716500 | -1.39132600 | H | -4.94599600 | -3.86551700 | 1.96370200  |
| C | 4.20701600  | -0.95560800 | -0.29439000 | H | -6.52232700 | -3.93058700 | 0.04090500  |
| C | 4.81510300  | -1.27948600 | 0.92076600  | C | -1.24878400 | -1.35518900 | -1.67716700 |
| C | 6.19931200  | -1.21809100 | 1.02624400  | C | -1.25970200 | -0.47558700 | -2.76369500 |
| C | 6.99259200  | -0.83554700 | -0.06672700 | C | -0.66085900 | -2.61351900 | -1.85736500 |
| H | 6.95603600  | -0.19803100 | -2.12096300 | C | -0.64957700 | -0.82064700 | -3.97103300 |
| H | 4.47556500  | -0.30220300 | -2.31899500 | H | -1.74453000 | 0.49021500  | -2.69262300 |
| H | 4.20266600  | -1.56011400 | 1.77117100  | C | -0.03412600 | -2.95309500 | -3.05041400 |
| H | 6.67704000  | -1.46454700 | 1.97102400  | H | -0.70735100 | -3.34765700 | -1.06161200 |
| C | 8.49550400  | -0.79518800 | 0.05591100  | C | -0.01682500 | -2.05159600 | -4.11302700 |
| H | 8.92024000  | -1.80623300 | 0.03805300  | H | -0.66957000 | -0.11783400 | -4.79830500 |
| H | 8.94799100  | -0.23301200 | -0.76523200 | H | 0.44544800  | -3.92149500 | -3.14451700 |
| H | 8.80692300  | -0.33155000 | 0.99747300  | H | 0.47666000  | -2.31001000 | -5.04425000 |
| S | 2.42511100  | -1.04367500 | -0.41272500 | C | -1.53497000 | 0.92285400  | 1.17284400  |
| O | 1.92571700  | -0.18848900 | 0.71282400  | H | -1.92585200 | 1.77957300  | 1.71198000  |
| O | 2.06870800  | -0.50095700 | -1.76109000 | C | -2.27745300 | 0.50583000  | -0.09807900 |
| O | 2.06810500  | -2.48195000 | -0.24169200 | H | -1.86133300 | 1.07902100  | -0.92405000 |
| C | -0.19311600 | -0.63906600 | 2.89907700  | C | -3.74943200 | 0.84291400  | -0.02470500 |
| C | 0.34271000  | -1.89992500 | 2.51991700  | C | -4.51094300 | 0.54741300  | 1.11252800  |
| C | 1.30339500  | -2.55595100 | 3.27985300  | C | -4.37861800 | 1.44006100  | -1.12036300 |
| C | 1.72002100  | -1.93719600 | 4.45755300  | C | -5.87442900 | 0.82705800  | 1.14366000  |
| C | 1.18795900  | -0.70096000 | 4.86108200  | H | -4.03648900 | 0.07253400  | 1.96495400  |
|   |             |             |             | C | -5.74433700 | 1.72090400  | -1.09324400 |
|   |             |             |             | H | -3.79604600 | 1.67953000  | -2.00574700 |
|   |             |             |             | C | -6.49663300 | 1.41133900  | 0.03900300  |

|   |             |            |             |   |             |             |             |
|---|-------------|------------|-------------|---|-------------|-------------|-------------|
| H | -6.45364100 | 0.58259200 | 2.02865200  | O | -3.57920100 | 0.95063300  | -0.33052000 |
| H | -6.21842700 | 2.18067800 | -1.95497100 | O | -3.03815700 | -0.24371700 | 1.80474200  |
| H | -7.56079000 | 1.62457200 | 0.06215900  | O | -2.24396300 | -1.13626400 | -0.38604700 |
| C | 0.24613500  | 3.99047500 | -0.06515900 | C | 1.06440000  | 1.72116300  | -2.30339500 |
| C | 0.08647700  | 3.16887300 | 1.06577200  | C | -0.23292600 | 1.26631700  | -1.96560800 |
| C | -0.06247500 | 3.66901700 | 2.34675900  | C | -1.38688800 | 1.78752300  | -2.52662900 |
| C | -0.04833100 | 5.06233200 | 2.49303800  | C | -1.21387800 | 2.81520900  | -3.45904200 |
| C | 0.10285900  | 5.89901900 | 1.38223700  | C | 0.05749100  | 3.29355200  | -3.79960200 |
| C | 0.25372900  | 5.37455200 | 0.09426500  | C | 1.21051200  | 2.75488500  | -3.22522700 |
| C | 0.42148900  | 3.10847100 | -1.22643000 | C | 1.96984300  | 0.89403200  | -1.51731700 |
| C | 0.31135800  | 1.83856600 | -0.78276200 | C | 1.13632000  | 0.00593400  | -0.73392700 |
| H | -0.16264400 | 3.01177900 | 3.20409100  | H | -2.36459700 | 1.43513200  | -2.21659400 |
| H | -0.15137000 | 5.49540100 | 3.48239300  | H | -2.08947600 | 3.26292100  | -3.91738400 |
| H | 0.10848200  | 6.97496000 | 1.52437700  | H | 0.14759700  | 4.10440700  | -4.51448300 |
| H | 0.38235000  | 6.03149500 | -0.75976000 | H | 2.19226800  | 3.13321900  | -3.48939600 |
| H | 0.77096900  | 1.15153200 | 1.03737200  | H | -0.99286300 | -0.33567200 | -0.67234400 |
| N | 0.06286200  | 1.79859400 | 0.63397200  | N | -0.12779900 | 0.21990600  | -1.00244000 |
| H | 0.50252600  | 0.90209500 | -1.28245100 | C | 1.92555900  | -0.97210000 | 0.09926200  |
| C | 0.78715500  | 3.53590800 | -2.61398200 | C | 1.78192100  | -2.39714600 | -0.46039600 |
| H | -0.09726400 | 3.93365000 | -3.13348700 | C | 2.21334600  | -3.47664900 | 0.31891300  |
| H | 1.50194100  | 4.36501700 | -2.54305900 | C | 1.31444500  | -2.64268700 | -1.75400800 |
| C | 1.42335100  | 2.41611800 | -3.45858900 | C | 2.19583700  | -4.77001700 | -0.19253200 |
| H | 1.61368900  | 2.81998800 | -4.46186900 | H | 2.57024900  | -3.29732500 | 1.32622100  |
| H | 0.70874800  | 1.59044300 | -3.57626400 | C | 1.28755000  | -3.94166600 | -2.26398100 |
| O | 2.64403700  | 1.96957500 | -2.91581900 | H | 0.96566000  | -1.82790300 | -2.37870100 |
| H | 2.48583600  | 1.13293500 | -2.43499800 | C | 1.73372300  | -5.00839500 | -1.48817800 |

#### INT-4D

|   |             |             |             |   |             |             |             |
|---|-------------|-------------|-------------|---|-------------|-------------|-------------|
| C | -6.30815900 | -2.99724700 | 1.01332700  | H | 1.71455300  | -6.01865900 | -1.88466300 |
| C | -5.16964200 | -2.21169300 | 1.17893500  | C | 1.49040000  | -0.94086800 | 1.57510100  |
| C | -4.79982300 | -1.32740600 | 0.16846500  | C | 2.36691000  | -0.67911200 | 2.63210700  |
| C | -5.55819600 | -1.21616600 | -0.99615800 | C | 0.15433500  | -1.23722800 | 1.87353800  |
| C | -6.69318900 | -2.00708900 | -1.14709900 | C | 1.91506900  | -0.69787000 | 3.95306200  |
| C | -7.08216200 | -2.91243400 | -0.15028100 | H | 3.40718500  | -0.44837300 | 2.44944300  |
| H | -6.60491200 | -3.68268400 | 1.80249600  | C | -0.30502300 | -1.22794000 | 3.18788600  |
| H | -4.57708800 | -2.26086300 | 2.08506800  | H | -0.55109800 | -1.47758400 | 1.08696900  |
| H | -5.26782600 | -0.50175600 | -1.75787300 | C | 0.57610000  | -0.96017300 | 4.23617400  |
| H | -7.29256700 | -1.91739500 | -2.04908800 | H | 2.61530900  | -0.49328800 | 4.75732700  |
| C | -8.29607700 | -3.78790600 | -0.33686100 | H | -1.35835600 | -1.40809200 | 3.36894700  |
| H | -8.03579300 | -4.71197200 | -0.86759700 | H | 0.22254300  | -0.95507600 | 5.26252600  |
| H | -8.73302700 | -4.07523200 | 0.62351400  | C | 3.26682900  | 0.62021700  | -1.25012700 |
| H | -9.06724200 | -3.28190900 | -0.92493200 | H | 4.13237400  | 1.09583700  | -1.69810000 |
| S | -3.31437900 | -0.35288900 | 0.35601900  | C | 3.41746200  | -0.41158000 | -0.16648800 |
|   |             |             |             | H | 3.70125100  | 0.17972400  | 0.70864700  |



|   |             |             |             |
|---|-------------|-------------|-------------|
| C | 0.06546400  | -1.89700800 | -4.30412000 |
| H | -0.81889800 | -0.01014400 | -4.84823300 |
| H | 0.77357400  | -3.75071600 | -3.45974400 |
| H | 0.51316400  | -2.06715600 | -5.27811200 |
| C | -1.20069400 | 0.73357700  | 1.13165100  |
| H | -1.59695800 | 1.54842400  | 1.72918200  |
| C | -2.09068600 | 0.26652700  | -0.02900500 |
| H | -1.87929900 | 0.88239900  | -0.89760200 |
| C | -3.55667700 | 0.46350300  | 0.29620700  |
| C | -4.07658500 | 0.15395800  | 1.55901000  |
| C | -4.42442400 | 0.94608300  | -0.68972400 |
| C | -5.43205500 | 0.32482100  | 1.82862200  |
| H | -3.41876300 | -0.24146300 | 2.32607100  |
| C | -5.78240500 | 1.11901000  | -0.42071200 |
| H | -4.04408900 | 1.17602400  | -1.68038800 |
| C | -6.29022600 | 0.80828700  | 0.83950300  |
| H | -5.82025200 | 0.07418400  | 2.81107000  |
| H | -6.44026500 | 1.49392500  | -1.19865600 |
| H | -7.34705500 | 0.93894200  | 1.05048100  |
| C | 0.02685800  | 3.95148600  | 0.17199200  |
| C | 0.28968400  | 2.94414900  | 1.12001700  |
| C | 0.49777000  | 3.21106200  | 2.46109300  |
| C | 0.43266600  | 4.55134300  | 2.86320600  |
| C | 0.15755900  | 5.56739000  | 1.94140900  |
| C | -0.04484900 | 5.28036700  | 0.58787200  |
| C | -0.06082800 | 3.29587500  | -1.13695100 |
| C | 0.11847400  | 1.97172400  | -0.93724200 |
| H | 0.73123100  | 2.41769000  | 3.16137900  |
| H | 0.60513600  | 4.80330700  | 3.90429000  |
| H | 0.11033500  | 6.59678500  | 2.28195000  |
| H | -0.23854300 | 6.07741600  | -0.12304400 |
| H | 1.06715300  | 0.97710100  | 0.61061100  |
| N | 0.23953100  | 1.66584300  | 0.46235900  |
| H | 0.25931700  | 1.16738100  | -1.64378800 |
| C | -0.35476800 | 3.94528900  | -2.44973600 |
| H | 0.21457900  | 4.87631600  | -2.56226900 |
| H | -0.05538100 | 3.27266200  | -3.25882000 |
| C | -1.85638600 | 4.25991400  | -2.59769000 |
| H | -2.05158500 | 4.63691600  | -3.60557600 |
| H | -2.14733900 | 5.04540500  | -1.88568200 |
| O | -2.67260500 | 3.10687100  | -2.43618600 |
| H | -2.70737200 | 2.90197300  | -1.49279500 |

**INT-5A**

|   |             |             |             |
|---|-------------|-------------|-------------|
| C | 4.82811100  | -0.85415700 | 2.25484700  |
| C | 3.73049000  | -1.70995400 | 2.27727900  |
| C | 3.27492100  | -2.28221500 | 1.08725800  |
| C | 3.94508500  | -2.03959000 | -0.10972000 |
| C | 5.04181000  | -1.17869600 | -0.11697200 |
| C | 5.48534000  | -0.55479400 | 1.05324000  |
| H | 5.17317600  | -0.39832900 | 3.17947900  |
| H | 3.21135600  | -1.92092700 | 3.20641500  |
| H | 3.58477500  | -2.46756500 | -1.03626700 |
| H | 5.54241600  | -0.96605000 | -1.05762600 |
| C | 6.60019000  | 0.45868600  | 1.01032800  |
| H | 6.20334100  | 1.44836000  | 0.75165200  |
| H | 7.10421000  | 0.54507900  | 1.97733700  |
| H | 7.34924400  | 0.19996000  | 0.25613300  |
| S | 1.68659500  | -3.13314600 | 1.11480900  |
| O | 1.40577300  | -3.54539700 | -0.29800600 |
| O | 1.76921600  | -4.23038300 | 2.08996800  |
| O | 0.74912700  | -2.01970400 | 1.53752700  |
| C | -0.41340300 | 3.16877700  | -0.53933600 |
| C | -0.95923100 | 3.76336200  | 0.63148100  |
| C | -0.63362100 | 5.04883600  | 1.04410200  |
| C | 0.26953700  | 5.75782500  | 0.25149000  |
| C | 0.82257000  | 5.19045200  | -0.90624100 |
| C | 0.48741600  | 3.90084000  | -1.31226400 |
| C | -0.95507400 | 1.81846600  | -0.58032200 |
| C | -1.81531600 | 1.69163300  | 0.53407800  |
| H | -1.05664300 | 5.48179500  | 1.94451600  |
| H | 0.55373500  | 6.76344500  | 0.54286400  |
| H | 1.53454000  | 5.76086100  | -1.49233700 |
| H | 0.94587600  | 3.46077100  | -2.18795700 |
| H | -2.35418200 | 2.96297800  | 2.09163600  |
| N | -1.82143400 | 2.82215800  | 1.24358000  |
| C | -2.57963400 | 0.40747100  | 0.59132700  |
| C | -3.96676500 | 0.55756900  | -0.05074000 |
| C | -4.88001900 | -0.49415100 | 0.09584400  |
| C | -4.32582600 | 1.66267600  | -0.82730300 |
| C | -6.12182300 | -0.44503600 | -0.52904600 |
| H | -4.60415700 | -1.35770800 | 0.69017600  |
| C | -5.57334900 | 1.71200800  | -1.45402300 |
| H | -3.63724200 | 2.49015000  | -0.95971600 |
| C | -6.47326200 | 0.65850400  | -1.30906200 |
| H | -6.81259100 | -1.27402800 | -0.41308800 |
| H | -5.83778700 | 2.57835200  | -2.05245400 |



|   |             |             |             |               |             |             |             |
|---|-------------|-------------|-------------|---------------|-------------|-------------|-------------|
| C | -4.28788900 | 1.56910100  | -0.90754900 | H             | 4.45147000  | 3.87015400  | 0.89545300  |
| C | -6.08930800 | -0.52228300 | -0.53896100 | H             | 4.81905400  | 3.91458100  | -1.54603200 |
| H | -4.59763500 | -1.36886200 | 0.75662200  | H             | 3.68308400  | 2.28182700  | -3.03198700 |
| C | -5.52201500 | 1.58466800  | -1.56199400 | H             | 1.44331700  | -0.19993200 | 1.22311300  |
| H | -3.59373000 | 2.38657000  | -1.06897400 | N             | 1.60498200  | 0.27126500  | 0.33511800  |
| C | -6.42498300 | 0.53923800  | -1.38182200 | H             | 0.82339500  | -1.35165600 | -0.79444000 |
| H | -6.78189000 | -1.34559300 | -0.39559300 | C             | 1.72446900  | -0.19606800 | -3.34132700 |
| H | -5.77353300 | 2.41813100  | -2.21080100 | H             | 1.03786100  | 0.47415700  | -3.88556400 |
| H | -7.38320700 | 0.55051700  | -1.89172100 | H             | 2.69457200  | -0.10332200 | -3.84326600 |
| C | -2.70704800 | -0.01096300 | 2.07421800  | C             | 1.22565100  | -1.64722800 | -3.49249400 |
| C | -1.88158000 | -0.94590400 | 2.70423800  | H             | 1.09791200  | -1.84547900 | -4.56466600 |
| C | -3.66749300 | 0.66839400  | 2.84467100  | H             | 0.23248500  | -1.75608200 | -3.03417700 |
| C | -2.01813000 | -1.19350000 | 4.07313100  | O             | 2.14225800  | -2.58156600 | -2.96872400 |
| H | -1.11459400 | -1.49311500 | 2.17003500  | H             | 1.81950100  | -2.93003500 | -2.11349800 |
| C | -3.79295400 | 0.42719100  | 4.21009100  |               |             |             |             |
| H | -4.34420700 | 1.36687600  | 2.35999100  |               |             |             |             |
| C | -2.96529000 | -0.51031800 | 4.83146600  | <b>INT-5B</b> |             |             |             |
| H | -1.36756700 | -1.92867000 | 4.53603200  | C             | -6.06258200 | -0.94896900 | -0.06746500 |
| H | -4.54425200 | 0.96096200  | 4.78450300  | C             | -4.70463700 | -1.11126700 | 0.19266800  |
| H | -3.06471800 | -0.70810000 | 5.89427100  | C             | -3.93925100 | -1.90664600 | -0.66234000 |
| C | -0.82303100 | 0.48980500  | -1.17909500 | C             | -4.52254600 | -2.54138000 | -1.75658900 |
| H | -0.72986600 | 0.32933000  | -2.24452300 | C             | -5.88341700 | -2.36998500 | -2.00150100 |
| C | -1.59024200 | -0.51189000 | -0.30681000 | C             | -6.67151100 | -1.56798900 | -1.16744400 |
| H | -0.87099900 | -0.92206300 | 0.40084300  | H             | -6.66272000 | -0.33771600 | 0.60126000  |
| C | -2.16238200 | -1.67646600 | -1.07011700 | H             | -4.25223100 | -0.64523800 | 1.06114500  |
| C | -2.93639100 | -1.49755900 | -2.22612500 | H             | -3.91189800 | -3.17552400 | -2.38940400 |
| C | -1.85285900 | -2.97498400 | -0.65070300 | H             | -6.34301000 | -2.87146000 | -2.84914500 |
| C | -3.40634100 | -2.59837100 | -2.93674700 | C             | -8.13840900 | -1.36013100 | -1.45155600 |
| H | -3.18702700 | -0.49514600 | -2.55917000 | H             | -8.72210600 | -1.31940600 | -0.52692000 |
| C | -2.32193700 | -4.07747900 | -1.36503800 | H             | -8.30717700 | -0.41523700 | -1.98275500 |
| H | -1.20600900 | -3.11756900 | 0.20700000  | H             | -8.54275900 | -2.16287300 | -2.07440000 |
| C | -3.10241800 | -3.89189900 | -2.50504800 | S             | -2.17473900 | -2.06422600 | -0.39339900 |
| H | -4.00981700 | -2.44768800 | -3.82671000 | O             | -1.54780700 | -0.90000900 | -1.11562000 |
| H | -2.05824900 | -5.07734700 | -1.03639600 | O             | -1.98119500 | -1.94954800 | 1.08866000  |
| H | -3.46458500 | -4.74985900 | -3.06338000 | O             | -1.74849300 | -3.36810900 | -0.95334300 |
| C | 2.65570100  | 1.30685300  | -1.38570000 | C             | 1.80709000  | 2.95159500  | -0.61737800 |
| C | 2.47059400  | 1.28429400  | 0.03793000  | C             | 2.54388200  | 2.85061600  | -1.82764400 |
| C | 3.11500600  | 2.20469300  | 0.87459600  | C             | 2.85919800  | 3.94927500  | -2.61182600 |
| C | 3.94118500  | 3.14029800  | 0.27461400  | C             | 2.42033000  | 5.19518600  | -2.15402500 |
| C | 4.15033100  | 3.16916600  | -1.12840200 | C             | 1.69015200  | 5.31749400  | -0.96517800 |
| C | 3.52121900  | 2.26233500  | -1.95864700 | C             | 1.37031300  | 4.20267400  | -0.18896100 |
| C | 1.86646700  | 0.25414600  | -1.92375500 | C             | 1.67896600  | 1.58533700  | -0.12574500 |
| C | 1.20279300  | -0.34288400 | -0.83468400 | C             | 2.37912600  | 0.75166100  | -1.04302100 |
| H | 2.97301200  | 2.17759200  | 1.94893600  | H             | 3.41884800  | 3.85074300  | -3.53591100 |



|   |             |             |             |              |             |             |             |
|---|-------------|-------------|-------------|--------------|-------------|-------------|-------------|
| H | 2.64529400  | 6.08139000  | -2.73801100 | C            | -1.82931800 | 3.17178800  | -0.10664600 |
| H | 1.34465500  | 6.29388500  | -0.64557600 | C            | -1.81632200 | 4.21409000  | -1.03539600 |
| H | 0.77257700  | 4.30807200  | 0.70825200  | C            | -1.74000300 | 5.51489800  | -0.54848400 |
| H | 3.37333900  | 1.10301500  | -2.82896900 | C            | -1.67950100 | 5.77681100  | 0.83628300  |
| N | 2.86481300  | 1.48063000  | -2.03944000 | C            | -1.70190800 | 4.74050700  | 1.76334700  |
| C | 2.45583200  | -0.68090300 | -0.63690700 | C            | -1.80959300 | 2.12829600  | 1.95684500  |
| C | 3.79011200  | -0.96328200 | 0.07983800  | C            | -1.86667300 | 1.19283200  | 0.94690300  |
| C | 4.13737100  | -2.29721700 | 0.32756300  | H            | -1.85465800 | 4.01495500  | -2.10186100 |
| C | 4.61958700  | 0.05329800  | 0.55982200  | H            | -1.72760200 | 6.34465900  | -1.24853500 |
| C | 5.28158800  | -2.60498800 | 1.05530400  | H            | -1.62675200 | 6.80538700  | 1.18034100  |
| H | 3.49443900  | -3.09058600 | -0.03432600 | H            | -1.66738000 | 4.95175300  | 2.82830400  |
| C | 5.77279700  | -0.25715800 | 1.28457300  | H            | -1.89582300 | 1.26099200  | -1.13132400 |
| H | 4.37527600  | 1.09584400  | 0.38626600  | N            | -1.87534700 | 1.80864600  | -0.28127700 |
| C | 6.10468000  | -1.58541000 | 1.53818300  | H            | -1.90938200 | 0.12197000  | 1.00969400  |
| H | 5.52707100  | -3.64384400 | 1.25088700  | C            | -1.81993200 | 1.81504900  | 3.42523700  |
| H | 6.40765200  | 0.54464700  | 1.64875900  | H            | -1.00354200 | 2.34856200  | 3.93554100  |
| H | 6.99790900  | -1.82666500 | 2.10565600  | H            | -2.74959700 | 2.18409300  | 3.87984000  |
| C | 2.29741800  | -1.58997800 | -1.85764500 | C            | -1.69712300 | 0.31693800  | 3.74762700  |
| C | 1.13125700  | -2.29833400 | -2.14119600 | H            | -1.60285100 | 0.20778900  | 4.83761200  |
| C | 3.37612900  | -1.66701900 | -2.75705000 | H            | -0.77422600 | -0.08859300 | 3.30862500  |
| C | 1.04244100  | -3.07366300 | -3.29948200 | O            | -2.82902000 | -0.41378600 | 3.30818400  |
| H | 0.26848600  | -2.26101700 | -1.49673100 | H            | -2.55030700 | -1.05555600 | 2.63018000  |
| C | 3.27912600  | -2.42620700 | -3.92001200 |              |             |             |             |
| H | 4.31205900  | -1.16744300 | -2.51890000 |              |             |             |             |
| C | 2.10686400  | -3.13603800 | -4.19460000 | <b>TS-4B</b> |             |             |             |
| H | 0.12301100  | -3.62062000 | -3.47942000 | C            | 6.11285400  | -0.25397100 | -0.05460200 |
| H | 4.12310700  | -2.47821600 | -4.60132000 | C            | 4.76561500  | -0.57068600 | -0.19697000 |
| H | 2.03304500  | -3.73779200 | -5.09518600 | C            | 4.22210900  | -1.59930300 | 0.57549700  |
| C | 1.11710300  | 0.77859400  | 0.82777800  | C            | 5.01344600  | -2.30870000 | 1.47443400  |
| H | 0.55842000  | 1.10707700  | 1.69300300  | C            | 6.36186400  | -1.97954000 | 1.60495300  |
| C | 1.27583800  | -0.67237400 | 0.47778900  | C            | 6.92980500  | -0.94718700 | 0.85000400  |
| H | 0.33549200  | -0.90948900 | -0.04796100 | H            | 6.54209000  | 0.53774200  | -0.66301200 |
| C | 1.44344900  | -1.60920700 | 1.64256500  | H            | 4.15021300  | -0.04594200 | -0.92012300 |
| C | 2.16427400  | -1.21161100 | 2.77550700  | H            | 4.57102700  | -3.11730200 | 2.04523000  |
| C | 0.91021900  | -2.90161300 | 1.58845400  | H            | 6.98465800  | -2.53732400 | 2.29920000  |
| C | 2.35883700  | -2.09071500 | 3.83748400  | C            | 8.38294800  | -0.57575500 | 1.01162300  |
| H | 2.60036800  | -0.21707000 | 2.81241200  | H            | 8.84255300  | -0.33394700 | 0.04833400  |
| C | 1.11221200  | -3.78331800 | 2.64887400  | H            | 8.49585700  | 0.30593300  | 1.65447300  |
| H | 0.31477600  | -3.21192200 | 0.73823300  | H            | 8.95494000  | -1.38887300 | 1.46672200  |
| C | 1.83588400  | -3.38292600 | 3.77251300  | S            | 2.47331200  | -1.96660700 | 0.45359300  |
| H | 2.92224800  | -1.77080200 | 4.70855400  | O            | 1.78725200  | -0.92981500 | 1.30254900  |
| H | 0.68699400  | -4.78058300 | 2.60036400  | O            | 2.13711200  | -1.78047600 | -1.00209300 |
| H | 1.98630800  | -4.07239200 | 4.59772100  | O            | 2.25649300  | -3.34043100 | 0.94553900  |
| C | -1.77862900 | 3.41297700  | 1.30633100  | C            | -1.98096000 | 2.92657400  | 0.28924600  |

|   |             |             |             |               |             |             |             |
|---|-------------|-------------|-------------|---------------|-------------|-------------|-------------|
| C | -2.77279100 | 2.89952700  | 1.47702600  | H             | -2.62222900 | -0.66166500 | -2.75874100 |
| C | -3.22242100 | 4.05763600  | 2.10609000  | C             | -0.84656600 | -4.06314100 | -2.28725200 |
| C | -2.88532400 | 5.27572800  | 1.52174000  | H             | -0.05030900 | -3.24253400 | -0.47239000 |
| C | -2.12289700 | 5.32768700  | 0.34216900  | C             | -1.62901400 | -3.83814000 | -3.41939800 |
| C | -1.67080600 | 4.16827500  | -0.27775000 | H             | -2.86941400 | -2.41811300 | -4.46796700 |
| C | -1.69601400 | 1.53842200  | -0.02126600 | H             | -0.34400100 | -5.01523300 | -2.14986200 |
| C | -2.34057100 | 0.76827500  | 0.93968700  | H             | -1.74814500 | -4.61842500 | -4.16511700 |
| H | -3.81687500 | 4.01215600  | 3.01305000  | C             | 1.40150900  | 3.20572100  | -1.17618700 |
| H | -3.22027100 | 6.19829600  | 1.98453200  | C             | 1.45854300  | 2.91361700  | 0.23288000  |
| H | -1.87742400 | 6.29125000  | -0.09215600 | C             | 1.64354900  | 3.93283100  | 1.18026900  |
| H | -1.07018500 | 4.22634400  | -1.17581300 | C             | 1.76423200  | 5.22642300  | 0.70707400  |
| H | -3.51583000 | 1.22569700  | 2.61815300  | C             | 1.72855700  | 5.53300900  | -0.68017200 |
| N | -2.97870900 | 1.55972800  | 1.83190600  | C             | 1.55597200  | 4.53928500  | -1.62021600 |
| C | -2.37667100 | -0.70327200 | 0.66392800  | C             | 1.17785200  | 1.97934800  | -1.84267000 |
| C | -3.69920700 | -1.09660800 | -0.01621000 | C             | 1.03358100  | 0.98804600  | -0.83717300 |
| C | -4.01382400 | -2.45641100 | -0.14198100 | H             | 1.67183500  | 3.71185700  | 2.24140500  |
| C | -4.55472400 | -0.15316700 | -0.59154600 | H             | 1.89626300  | 6.03715600  | 1.41676900  |
| C | -5.14742700 | -2.86181900 | -0.83808600 | H             | 1.84176400  | 6.56534400  | -0.99385600 |
| H | -3.35137600 | -3.19680800 | 0.29091300  | H             | 1.52708800  | 4.76976100  | -2.68056200 |
| C | -5.69713100 | -0.55954000 | -1.28545400 | H             | 1.46611500  | 0.97604800  | 1.19541800  |
| H | -4.33214600 | 0.90536200  | -0.51521400 | N             | 1.28185200  | 1.57679100  | 0.39467700  |
| C | -5.99545800 | -1.91377300 | -1.41439600 | H             | 1.28220100  | -0.05941800 | -0.96019700 |
| H | -5.36481300 | -3.92068400 | -0.93686400 | C             | 1.10768300  | 1.68673900  | -3.30434700 |
| H | -6.35121000 | 0.18826100  | -1.72379900 | H             | 0.10684600  | 1.92804600  | -3.69928500 |
| H | -6.88079900 | -2.22986700 | -1.95736800 | H             | 1.80581900  | 2.34917600  | -3.82882800 |
| C | -2.18042500 | -1.50331700 | 1.95721900  | C             | 1.44348200  | 0.22053500  | -3.64160300 |
| C | -0.97014100 | -2.08543400 | 2.33830500  | H             | 1.39908600  | 0.10446200  | -4.73320100 |
| C | -3.27363300 | -1.59121600 | 2.83776500  | H             | 0.67877000  | -0.44581600 | -3.22215900 |
| C | -0.85807700 | -2.74709100 | 3.56356400  | O             | 2.73364700  | -0.12276000 | -3.17784900 |
| H | -0.08650400 | -2.02398500 | 1.72089200  | H             | 2.64445100  | -0.82068700 | -2.50088100 |
| C | -3.15636700 | -2.23707200 | 4.06548800  |               |             |             |             |
| H | -4.23492300 | -1.18208100 | 2.53874600  |               |             |             |             |
| C | -1.94310200 | -2.82354000 | 4.43262600  |               |             |             |             |
| H | 0.09447400  | -3.19774700 | 3.82263800  | <b>INT-5C</b> |             |             |             |
| H | -4.01540700 | -2.29498200 | 4.72746300  | C             | -5.42592700 | -3.06504500 | -1.90959300 |
| H | -1.85050100 | -3.33822600 | 5.38411100  | C             | -4.09469900 | -2.95393300 | -1.52131500 |
| C | -1.03596700 | 0.67416600  | -0.94907500 | C             | -3.68756400 | -1.84385300 | -0.78041100 |
| H | -1.08477100 | 0.83857100  | -2.01784800 | C             | -4.60215800 | -0.85678300 | -0.42257900 |
| C | -1.17826400 | -0.76879400 | -0.42228800 | C             | -5.93264100 | -0.97923400 | -0.82132100 |
| H | -0.28033000 | -0.98604400 | 0.15341800  | C             | -6.36478900 | -2.08047300 | -1.56834900 |
| C | -1.31651600 | -1.82228600 | -1.49169800 | H             | -5.74563300 | -3.92928800 | -2.48601500 |
| C | -2.09853900 | -1.60437900 | -2.63413300 | H             | -3.37165800 | -3.72082200 | -1.77572400 |
| C | -0.68686800 | -3.06171400 | -1.33022800 | H             | -4.26469300 | -0.00917700 | 0.16042700  |
| C | -2.25383300 | -2.60229300 | -3.59271400 | H             | -6.64706600 | -0.20789000 | -0.54540100 |
|   |             |             |             | C             | -7.81019200 | -2.22564200 | -1.97506100 |

|   |             |             |             |              |             |             |             |
|---|-------------|-------------|-------------|--------------|-------------|-------------|-------------|
| H | -7.90100800 | -2.59356700 | -3.00191400 | C            | 1.33796800  | 0.14416600  | 0.63294800  |
| H | -8.33252800 | -2.94128700 | -1.32857200 | H            | 2.17274700  | -0.50078100 | 0.38702400  |
| H | -8.34205500 | -1.27266600 | -1.90730800 | C            | 0.65911900  | 0.98711000  | -0.40548900 |
| S | -1.95714700 | -1.65032000 | -0.35849300 | H            | -0.04105800 | 0.27369900  | -0.87633100 |
| O | -1.46993200 | -3.00986500 | 0.01991900  | C            | 1.54951600  | 1.56145700  | -1.47102400 |
| O | -1.28829200 | -1.14407300 | -1.60376700 | C            | 2.81042100  | 2.08419200  | -1.15995500 |
| O | -1.92875800 | -0.65522200 | 0.75328800  | C            | 1.12095400  | 1.57153800  | -2.80257800 |
| C | 0.50476800  | -0.41377100 | 3.12369700  | C            | 3.62347900  | 2.61658000  | -2.15687300 |
| C | -0.64434000 | 0.19832800  | 3.68457000  | H            | 3.14682300  | 2.08827200  | -0.12761200 |
| C | -1.16225700 | -0.16428900 | 4.91643400  | C            | 1.93125000  | 2.10926800  | -3.80250500 |
| C | -0.49364000 | -1.17999600 | 5.60725200  | H            | 0.15661500  | 1.14258400  | -3.05434100 |
| C | 0.64529400  | -1.79507200 | 5.07333300  | C            | 3.18351400  | 2.63463700  | -3.48139200 |
| C | 1.15651600  | -1.42231700 | 3.82794000  | H            | 4.59857100  | 3.01869700  | -1.90039500 |
| C | 0.68657400  | 0.21821000  | 1.82471400  | H            | 1.58771600  | 2.10967800  | -4.83236100 |
| C | -0.34968900 | 1.19672000  | 1.69944100  | H            | 3.81600900  | 3.05023700  | -4.25970800 |
| H | -2.04866200 | 0.30840500  | 5.32563700  | C            | 3.47298400  | -2.45980300 | -0.34150300 |
| H | -0.86989500 | -1.49716100 | 6.57414800  | C            | 2.30146600  | -3.06094000 | 0.21620900  |
| H | 1.13693100  | -2.58205100 | 5.63547800  | C            | 2.32103200  | -3.73319700 | 1.44340200  |
| H | 2.02614400  | -1.91459300 | 3.40782900  | C            | 3.53235100  | -3.79632200 | 2.12385200  |
| H | -1.97017500 | 1.71746000  | 2.86823200  | C            | 4.70010900  | -3.20247800 | 1.59704800  |
| N | -1.10630000 | 1.19818300  | 2.78108300  | C            | 4.68307600  | -2.53940200 | 0.37682200  |
| C | -0.25484100 | 2.01021000  | 0.45201600  | C            | 3.07210500  | -1.83704100 | -1.58314700 |
| C | 0.57333800  | 3.28558300  | 0.71237600  | C            | 1.72120500  | -2.08582400 | -1.71451100 |
| C | 0.59914600  | 4.26808100  | -0.28602200 | H            | 1.41684200  | -4.18046300 | 1.84380500  |
| C | 1.34943800  | 3.47077900  | 1.86007900  | H            | 3.58303800  | -4.31842200 | 3.07503300  |
| C | 1.39251700  | 5.40156600  | -0.14552500 | H            | 5.62903600  | -3.27411900 | 2.15465300  |
| H | 0.00482800  | 4.13026000  | -1.18167100 | H            | 5.58855500  | -2.10426700 | -0.03389800 |
| C | 2.14345400  | 4.61141600  | 2.00240000  | H            | 0.26989400  | -3.02602700 | -0.45995700 |
| H | 1.35195000  | 2.73050600  | 2.65200700  | N            | 1.25940500  | -2.81783600 | -0.64403300 |
| C | 2.17069400  | 5.57792700  | 1.00029300  | H            | 1.02359900  | -1.75732300 | -2.46983800 |
| H | 1.40725900  | 6.14538900  | -0.93579000 | C            | 3.94507600  | -1.08076900 | -2.54015000 |
| H | 2.73790400  | 4.73904100  | 2.90175600  | H            | 3.32319100  | -0.45999200 | -3.19452200 |
| H | 2.78963900  | 6.46273200  | 1.11058900  | H            | 4.60160500  | -0.39619900 | -1.98995700 |
| C | -1.63753800 | 2.38704800  | -0.08052700 | C            | 4.81982600  | -1.99518700 | -3.40919600 |
| C | -2.22379900 | 1.80076400  | -1.20192600 | H            | 5.44150200  | -1.39069500 | -4.07843700 |
| C | -2.36479100 | 3.34978400  | 0.63829300  | H            | 4.17091900  | -2.62733100 | -4.03581200 |
| C | -3.51161800 | 2.17010400  | -1.59528000 | O            | 5.72232900  | -2.78623400 | -2.64775500 |
| H | -1.72252300 | 1.00727900  | -1.73787600 | H            | 5.18668400  | -3.33962100 | -2.06203700 |
| C | -3.65555500 | 3.70611600  | 0.25366000  |              |             |             |             |
| H | -1.90137300 | 3.84943400  | 1.48504200  |              |             |             |             |
| C | -4.23370300 | 3.11677700  | -0.87177700 | <b>TS-4C</b> |             |             |             |
| H | -3.95594200 | 1.68859600  | -2.46012000 | C            | 6.23396200  | 0.99200000  | -1.33345800 |
| H | -4.20137000 | 4.45167600  | 0.82394300  | C            | 4.96839900  | 1.08934500  | -0.75695700 |
| H | -5.23721900 | 3.39366800  | -1.17958400 | C            | 4.22933300  | -0.06843700 | -0.53096200 |

|   |             |             |             |   |             |             |             |
|---|-------------|-------------|-------------|---|-------------|-------------|-------------|
| C | 4.74533000  | -1.31909100 | -0.87334300 | C | 1.72021700  | -3.89512400 | -1.46107800 |
| C | 6.00867900  | -1.40130000 | -1.45085700 | H | 0.72099900  | -2.03982600 | -1.78608400 |
| C | 6.77253800  | -0.25000300 | -1.68893100 | C | 1.11124600  | -5.11478500 | 0.52085300  |
| H | 6.81462100  | 1.89411900  | -1.50801600 | H | -0.46974100 | -4.25975700 | 1.69375500  |
| H | 4.55159500  | 2.04758600  | -0.46885600 | C | 1.89703000  | -4.99562600 | -0.62590600 |
| H | 4.15818500  | -2.20905000 | -0.67400100 | H | 2.33127200  | -3.78156200 | -2.35139900 |
| H | 6.41420800  | -2.37385200 | -1.71838200 | H | 1.23432800  | -5.96634400 | 1.18329700  |
| C | 8.15558600  | -0.35358100 | -2.28271800 | H | 2.63885100  | -5.75206200 | -0.86312700 |
| H | 8.45197400  | 0.57923900  | -2.77062000 | C | -1.52229200 | 0.48673100  | 0.25029600  |
| H | 8.90261200  | -0.57022000 | -1.50908900 | H | -2.47503500 | 1.00046900  | 0.24792600  |
| H | 8.21372000  | -1.15792300 | -3.02239400 | C | -1.35944300 | -0.78688900 | -0.60870100 |
| S | 2.56961300  | 0.02414500  | 0.13706600  | H | -0.42054500 | -0.65842000 | -1.14343000 |
| O | 2.50112400  | 1.33578000  | 0.87019000  | C | -2.46137800 | -1.03658400 | -1.60222300 |
| O | 1.66489400  | 0.02106700  | -1.06110500 | C | -3.81417000 | -0.90619800 | -1.25697900 |
| O | 2.42216700  | -1.16476400 | 1.00475900  | C | -2.13838400 | -1.38319000 | -2.91921400 |
| C | -0.40301500 | 0.84118400  | 2.71567000  | C | -4.81363500 | -1.10772300 | -2.20481500 |
| C | 0.26432300  | -0.19185900 | 3.43789700  | H | -4.08610400 | -0.66350300 | -0.23508300 |
| C | 0.87595800  | 0.03557800  | 4.66552300  | C | -3.13749400 | -1.58943700 | -3.87128300 |
| C | 0.79873700  | 1.32292900  | 5.19330700  | H | -1.09495600 | -1.48762700 | -3.20003100 |
| C | 0.12004500  | 2.34805400  | 4.51365800  | C | -4.47868100 | -1.44844800 | -3.51692000 |
| C | -0.47884600 | 2.11979800  | 3.27851300  | H | -5.85554700 | -1.00418300 | -1.91788300 |
| C | -0.83715000 | 0.22826100  | 1.48156300  | H | -2.86641200 | -1.85473400 | -4.88857400 |
| C | -0.46062200 | -1.10678100 | 1.53686100  | H | -5.25824800 | -1.60428400 | -4.25627700 |
| H | 1.39568800  | -0.75897400 | 5.19068400  | C | -1.43367800 | 4.00891600  | -0.48655300 |
| H | 1.26935800  | 1.53458800  | 6.14800800  | C | -0.25168100 | 3.86176000  | 0.32699500  |
| H | 0.06656600  | 3.33689800  | 4.95823500  | C | 0.17105800  | 4.88884300  | 1.19584300  |
| H | -0.98988600 | 2.92194600  | 2.75943800  | C | -0.58600800 | 6.04195200  | 1.22881600  |
| H | 0.74925000  | -2.18811400 | 2.83502300  | C | -1.75485600 | 6.20871700  | 0.42987300  |
| N | 0.14929800  | -1.38505000 | 2.71122900  | C | -2.18685700 | 5.21181100  | -0.41472200 |
| C | -1.02565000 | -1.96345000 | 0.44176500  | C | -1.57435000 | 2.81767900  | -1.22519400 |
| C | -2.34222700 | -2.62468500 | 0.88755300  | C | -0.53023000 | 1.93582700  | -0.79205400 |
| C | -2.89565200 | -3.63434300 | 0.08845400  | H | 1.05258400  | 4.76147700  | 1.81382700  |
| C | -3.05477200 | -2.19479200 | 2.01121400  | H | -0.28564100 | 6.85237800  | 1.88600000  |
| C | -4.13266700 | -4.19150400 | 0.39735300  | H | -2.30861000 | 7.13905600  | 0.49854500  |
| H | -2.35398200 | -3.97275100 | -0.78744700 | H | -3.06592800 | 5.33803200  | -1.03696600 |
| C | -4.29549700 | -2.75525400 | 2.32370300  | H | 1.15656800  | 2.22684300  | 0.49257800  |
| H | -2.64930300 | -1.41755400 | 2.64839000  | N | 0.27906300  | 2.64471800  | 0.10296500  |
| C | -4.84072600 | -3.75223000 | 1.51741300  | H | -0.00056100 | 1.22309900  | -1.41309000 |
| H | -4.54649800 | -4.96566100 | -0.24146100 | C | -2.60776200 | 2.50487500  | -2.25496500 |
| H | -4.83099000 | -2.41079300 | 3.20333800  | H | -2.65816900 | 1.42669800  | -2.42617400 |
| H | -5.80548000 | -4.18674800 | 1.76062400  | H | -3.59684400 | 2.83356000  | -1.91519200 |
| C | -0.02231000 | -3.02688700 | -0.01640900 | C | -2.31429100 | 3.19627200  | -3.60398800 |
| C | 0.77381900  | -2.91564200 | -1.15713800 | H | -3.09135100 | 2.91097700  | -4.31887400 |
| C | 0.15755300  | -4.14399900 | 0.81482800  | H | -1.35102200 | 2.83689000  | -3.99401600 |

O -2.34877700 4.61099300 -3.52594300  
H -1.58604800 4.89534900 -3.00433400

**INT-5D**

C 5.41346900 0.86549400 -1.77537700  
C 4.30370100 0.09720700 -2.11957100  
C 3.79867400 -0.83264800 -1.21096600  
C 4.43536400 -1.03132900 0.01104800  
C 5.54598400 -0.25838100 0.34734900  
C 6.03460200 0.72267400 -0.52750700  
H 5.79659300 1.60021500 -2.47829400  
H 3.81765600 0.21401900 -3.08216800  
H 4.05501100 -1.78234500 0.68849300  
H 6.03830600 -0.41606800 1.30423200  
C 7.16171900 1.63324000 -0.11287200  
H 7.87335300 1.12241100 0.54238500  
H 7.70745300 2.01861400 -0.97831000  
H 6.76354200 2.49411000 0.43815800  
S 2.20706500 -1.59719400 -1.54901300  
O 1.23804100 -0.56230200 -1.05237100  
O 2.15542100 -1.83453600 -3.00063900  
O 2.16600700 -2.84644700 -0.70074800  
C 1.06964100 -0.18490500 2.50429100  
C 1.55156400 -1.49117300 2.23536500  
C 2.69975000 -1.99644200 2.82113300  
C 3.39843600 -1.15025600 3.68983200  
C 2.95102800 0.14918300 3.95190300  
C 1.78348300 0.64385500 3.36481500  
C -0.12520900 -0.04707800 1.67837900  
C -0.28281200 -1.30410500 0.99520800  
H 3.04567500 -3.00034500 2.60149100  
H 4.30673800 -1.50932200 4.16278900  
H 3.52275600 0.78888400 4.61525100  
H 1.45567900 1.65727200 3.56305800  
H 1.09557200 -2.78682200 0.58414700  
N 0.68302100 -2.14519600 1.31240900  
C -1.53642300 -1.36709400 0.17935800  
C -2.68455100 -1.93012400 1.04897400  
C -3.88130300 -2.29111000 0.41557800  
C -2.61274700 -2.01522700 2.44256500  
C -4.98218900 -2.70567100 1.15755000  
H -3.94861100 -2.23604200 -0.66372200  
C -3.71562200 -2.44002400 3.18700800

H -1.70080900 -1.75567300 2.96697100  
C -4.90541600 -2.78063100 2.54940800  
H -5.90251700 -2.96934200 0.64593500  
H -3.63611200 -2.50498800 4.26782700  
H -5.76337100 -3.10724500 3.12870800  
C -1.37250500 -2.19155900 -1.09540500  
C -1.21056700 -1.63222400 -2.36358200  
C -1.31805800 -3.58611100 -0.96598000  
C -1.00757700 -2.44456500 -3.47715800  
H -1.18354800 -0.55846700 -2.48903800  
C -1.10437300 -4.39836600 -2.07578500  
H -1.44816800 -4.03676800 0.01274100  
C -0.95322500 -3.82866800 -3.33909900  
H -0.85565200 -1.98806100 -4.44915000  
H -1.05130100 -5.47522400 -1.95074400  
H -0.77653500 -4.45721800 -4.20576400  
C -1.00870800 0.83513200 1.14721200  
H -1.11865500 1.88310800 1.39346000  
C -1.78540400 0.21370200 0.01379600  
H -1.22260700 0.51624400 -0.87614800  
C -3.21458600 0.66182300 -0.13693100  
C -3.94206300 1.13551100 0.95758000  
C -3.84526100 0.58627400 -1.38391800  
C -5.26725000 1.53991500 0.81013400  
H -3.47296500 1.17582900 1.93580300  
C -5.17383400 0.97616800 -1.53261300  
H -3.29491500 0.20802900 -2.23870100  
C -5.88810500 1.46039300 -0.43573300  
H -5.81614100 1.91015700 1.67035100  
H -5.65031300 0.90742900 -2.50596500  
H -6.92214400 1.77019400 -0.55122200  
C -0.75679700 3.73661300 -0.34045700  
C -1.50279100 3.35004200 -1.48841500  
C -2.82564200 3.74926200 -1.68634100  
C -3.41529000 4.53236000 -0.70092700  
C -2.69992300 4.92021200 0.44869700  
C -1.37689300 4.53564400 0.63438800  
C 0.54066400 3.10730900 -0.43303000  
C 0.53941400 2.38250400 -1.60013100  
H -3.38656600 3.43149200 -2.55850800  
H -4.44978000 4.83875800 -0.81538400  
H -3.19234100 5.53154200 1.19861900  
H -0.82898000 4.84552000 1.51978100  
H -0.90895700 2.13923000 -3.13985000

|   |             |            |             |
|---|-------------|------------|-------------|
| N | -0.68801400 | 2.51762300 | -2.23368300 |
| H | 1.27751800  | 1.70013800 | -1.99032700 |
| C | 1.63715800  | 3.20001200 | 0.58698200  |
| H | 2.06683100  | 4.21068200 | 0.60597200  |
| H | 1.22232200  | 3.03883500 | 1.59135100  |
| C | 2.74926200  | 2.18659600 | 0.35963300  |
| H | 3.22384900  | 2.36990400 | -0.61458600 |
| H | 2.32394600  | 1.17819900 | 0.32351900  |
| O | 3.70162100  | 2.31510100 | 1.41336100  |
| H | 4.25863800  | 1.52609900 | 1.36481700  |

**TS-4D**

|   |             |             |             |
|---|-------------|-------------|-------------|
| C | 5.55115600  | 0.14627200  | -1.89305900 |
| C | 4.33015000  | -0.46349100 | -2.16615500 |
| C | 3.69130200  | -1.21028100 | -1.17503500 |
| C | 4.28736200  | -1.36822500 | 0.07279400  |
| C | 5.51441300  | -0.75621200 | 0.33798000  |
| C | 6.15815700  | 0.02172600  | -0.63488000 |
| H | 6.04402400  | 0.73229400  | -2.66422600 |
| H | 3.86554200  | -0.37707200 | -3.14229000 |
| H | 3.79103400  | -1.97009800 | 0.82228300  |
| H | 5.97683100  | -0.88352600 | 1.31353800  |
| C | 7.44327500  | 0.74637700  | -0.32380400 |
| H | 7.99195100  | 0.26072200  | 0.48791800  |
| H | 8.09794700  | 0.79450300  | -1.19881100 |
| H | 7.23507300  | 1.77749700  | -0.01290600 |
| S | 2.04375300  | -1.86793800 | -1.48916200 |
| O | 1.14316300  | -0.69571900 | -1.19777200 |
| O | 2.03228900  | -2.27381600 | -2.90710900 |
| O | 1.87493500  | -2.97660700 | -0.49947900 |
| C | 0.86640800  | 0.24476300  | 2.31413100  |
| C | 1.35226400  | -1.09606100 | 2.39463300  |
| C | 2.46425100  | -1.43807900 | 3.15542800  |
| C | 3.09829500  | -0.42158400 | 3.86983700  |
| C | 2.60680500  | 0.89286100  | 3.84704500  |
| C | 1.48895200  | 1.22923300  | 3.08879800  |
| C | -0.23855000 | 0.19578600  | 1.37848400  |
| C | -0.40246000 | -1.14415700 | 1.04234300  |
| H | 2.81724600  | -2.46334100 | 3.19517200  |
| H | 3.97269600  | -0.65594700 | 4.46832300  |
| H | 3.10382200  | 1.65857400  | 4.43332200  |
| H | 1.10593700  | 2.24365700  | 3.10115300  |
| H | 0.88577400  | -2.73609200 | 1.10890700  |

|   |             |             |             |
|---|-------------|-------------|-------------|
| N | 0.51569100  | -1.93440200 | 1.63742300  |
| C | -1.65169700 | -1.44435200 | 0.27361400  |
| C | -2.82289400 | -1.73296300 | 1.23677200  |
| C | -4.01577600 | -2.24384900 | 0.70611400  |
| C | -2.77697100 | -1.42516900 | 2.59952500  |
| C | -5.13607300 | -2.42486500 | 1.51058100  |
| H | -4.06248100 | -2.49152500 | -0.34801000 |
| C | -3.89938900 | -1.61334000 | 3.41001700  |
| H | -1.86752000 | -1.03416200 | 3.03950500  |
| C | -5.08387400 | -2.10789300 | 2.86934500  |
| H | -6.05175700 | -2.81262600 | 1.07475100  |
| H | -3.83979200 | -1.37447800 | 4.46766700  |
| H | -5.95610200 | -2.25195400 | 3.49962700  |
| C | -1.46951600 | -2.61006300 | -0.70206200 |
| C | -1.21583900 | -2.46423600 | -2.06598800 |
| C | -1.46459500 | -3.90425000 | -0.15909300 |
| C | -0.95635700 | -3.57635800 | -2.86650600 |
| H | -1.14506600 | -1.48519500 | -2.51927200 |
| C | -1.20555500 | -5.01476000 | -0.95533900 |
| H | -1.66352000 | -4.03791600 | 0.89924100  |
| C | -0.95188300 | -4.85430400 | -2.31728800 |
| H | -0.71972600 | -3.42968400 | -3.91421200 |
| H | -1.19474700 | -6.00452100 | -0.50909900 |
| H | -0.73513700 | -5.71633800 | -2.94008000 |
| C | -1.07332700 | 1.00550700  | 0.53449100  |
| H | -1.62398800 | 1.85566800  | 0.93266400  |
| C | -1.85856700 | 0.00220600  | -0.36992600 |
| H | -1.29877900 | -0.06437800 | -1.30089800 |
| C | -3.27437600 | 0.40559400  | -0.69205900 |
| C | -4.12066100 | 0.97128300  | 0.27168500  |
| C | -3.76931600 | 0.21740000  | -1.98978400 |
| C | -5.42050200 | 1.34533200  | -0.05545200 |
| H | -3.76779900 | 1.09044100  | 1.29038200  |
| C | -5.07347500 | 0.59128100  | -2.32038100 |
| H | -3.13359600 | -0.24444900 | -2.73967100 |
| C | -5.90117500 | 1.16033600  | -1.35402400 |
| H | -6.06332800 | 1.77559800  | 0.70616900  |
| H | -5.43918600 | 0.43428200  | -3.33039100 |
| H | -6.91556500 | 1.45243000  | -1.60713000 |
| C | -0.27116800 | 4.25740800  | -0.35364200 |
| C | -1.40766600 | 3.86264100  | -1.13213200 |
| C | -2.45401200 | 4.75907400  | -1.41724200 |
| C | -2.31749900 | 6.05289400  | -0.95293500 |
| C | -1.17833500 | 6.47757400  | -0.21262400 |

C -0.16141400 5.59963100 0.08845500  
 C 0.55648600 3.12763400 -0.20594300  
 C -0.14035400 2.00498400 -0.78154900  
 H -3.32516500 4.44288200 -1.98068300  
 H -3.10268400 6.77349400 -1.15949400  
 H -1.12353500 7.50845200 0.12016900  
 H 0.70387700 5.91708000 0.66081600  
 H -2.00348300 2.01006900 -1.86216900  
 N -1.24472200 2.56936800 -1.49583900  
 H 0.40366400 1.17974000 -1.24127300  
 C 1.93283500 3.14285000 0.37088600  
 H 2.43005400 4.06589500 0.04622000  
 H 1.89187300 3.20873700 1.46180300  
 C 2.81095300 1.95272700 -0.00097400  
 H 2.96039900 1.92393100 -1.09061800  
 H 2.32269000 1.01325400 0.27214700  
 O 4.03646300 2.13112700 0.69012400  
 H 4.50215800 1.28318200 0.65836400

**TS-3(R,R)**

C -5.28050300 0.02536000 0.33130000  
 C -4.28307600 -0.68615200 0.99500100  
 C -3.66869700 -1.76232800 0.36312100  
 C -4.06706600 -2.14717400 -0.91828000  
 C -5.06820600 -1.43392200 -1.56875000  
 C -5.68186000 -0.32981200 -0.96039500  
 H -5.74803900 0.87582000 0.82015100  
 H -3.96448600 -0.41489300 1.99346000  
 H -3.58383000 -2.99162400 -1.39796800  
 H -5.37686300 -1.72965200 -2.56818300  
 C -6.71877600 0.48052800 -1.69453100  
 H -6.25190500 1.33769700 -2.19470900  
 H -7.47698700 0.87493600 -1.01157300  
 H -7.22558100 -0.11380000 -2.46012200  
 S -2.32021000 -2.64544500 1.15865000  
 O -2.75587700 -4.02801200 1.39624900  
 O -1.99479100 -1.85712800 2.38273600  
 O -1.22217600 -2.55234900 0.11258500  
 C 0.95086500 3.07328200 -0.77413100  
 C 1.85672900 3.55707700 0.21153800  
 C 1.83154700 4.87228900 0.66664600  
 C 0.87709600 5.71978400 0.10767700  
 C -0.01640600 5.26486700 -0.87777200

C 0.01213700 3.94901700 -1.32835300  
 C 1.29498100 1.68016900 -0.95919300  
 C 2.35592800 1.38969100 -0.10535700  
 H 2.52384300 5.22423600 1.42459500  
 H 0.82591600 6.75160300 0.43937700  
 H -0.74571800 5.95378300 -1.29118100  
 H -0.69305800 3.60052000 -2.07390700  
 H 3.43050000 2.55030000 1.28094100  
 N 2.70325500 2.49731600 0.58464700  
 C 2.86045500 -0.03463700 -0.16155500  
 C 4.36629700 -0.06060600 -0.48704400  
 C 5.23286000 -1.00019500 0.08080100  
 C 4.88563100 0.85660400 -1.41068400  
 C 6.58251700 -1.02604400 -0.27193300  
 H 4.85117700 -1.71138400 0.80364000  
 C 6.23403600 0.83465500 -1.76132400  
 H 4.22936500 1.59693500 -1.86046400  
 C 7.08925000 -0.10926000 -1.19192800  
 H 7.23732700 -1.76586900 0.17783300  
 H 6.61528700 1.55600300 -2.47747600  
 H 8.14020100 -0.12863700 -1.46232800  
 C 2.54087900 -0.69885300 1.18906300  
 C 1.55849400 -1.67399900 1.37095100  
 C 3.21643700 -0.21232900 2.32229300  
 C 1.23606100 -2.12808700 2.65327600  
 H 0.98816700 -2.07414900 0.54656900  
 C 2.90419900 -0.67121000 3.59726500  
 H 4.01308300 0.51745900 2.20395400  
 C 1.90013800 -1.62691800 3.76791200  
 H 0.42591200 -2.83831200 2.76407900  
 H 3.43580100 -0.27469100 4.45691700  
 H 1.63266800 -1.96753500 4.76263100  
 C 0.87628900 0.49444600 -1.59215600  
 H 0.25558500 0.47296200 -2.47794100  
 C 2.00712100 -0.51708500 -1.43962600  
 H 2.65414400 -0.21728600 -2.27989900  
 C 1.73520900 -1.98632800 -1.68754700  
 C 0.52067900 -2.42520400 -2.21862500  
 C 2.75255000 -2.92896400 -1.48016700  
 C 0.30523000 -3.77454300 -2.49422000  
 H -0.28737000 -1.72701400 -2.39373400  
 C 2.53987600 -4.27562400 -1.75676800  
 H 3.71277500 -2.61045300 -1.09638800  
 C 1.31117100 -4.70641000 -2.26025700

|   |             |             |             |   |             |             |             |
|---|-------------|-------------|-------------|---|-------------|-------------|-------------|
| H | -0.66146300 | -4.09329300 | -2.86882900 | O | -3.39747000 | -2.95785300 | 2.86052000  |
| H | 3.33580100  | -4.99111900 | -1.57431500 | O | -2.74204700 | -0.58013000 | 3.31465600  |
| H | 1.13978100  | -5.75901800 | -2.46093900 | O | -1.44186800 | -1.93442300 | 1.69267800  |
| C | -2.19934400 | 1.85174900  | -0.18176800 | C | 2.25531400  | 3.06608700  | -0.03138100 |
| C | -1.84388100 | 0.79784000  | -1.05279500 | C | 3.44322100  | 3.01012200  | 0.75066200  |
| C | -2.38290300 | 0.67425200  | -2.32292900 | C | 4.02937400  | 4.14815300  | 1.29748900  |
| C | -3.29782000 | 1.65119000  | -2.73551500 | C | 3.41350900  | 5.37054600  | 1.03728800  |
| C | -3.65181200 | 2.70909400  | -1.88982500 | C | 2.25131300  | 5.45032400  | 0.24987400  |
| C | -3.11251500 | 2.81512900  | -0.60428200 | C | 1.66606500  | 4.30919200  | -0.28866800 |
| C | -1.44555600 | 1.65606200  | 1.05216700  | C | 1.96177400  | 1.69660000  | -0.39296500 |
| C | -0.68376300 | 0.54703000  | 0.87653000  | C | 2.98414100  | 0.90175600  | 0.11490500  |
| H | -2.12799900 | -0.15893300 | -2.96963900 | H | 4.93109300  | 4.08880500  | 1.89836700  |
| H | -3.74462900 | 1.57859100  | -3.72159700 | H | 3.84356700  | 6.27838600  | 1.44708800  |
| H | -4.36178300 | 3.45345100  | -2.23672000 | H | 1.80475900  | 6.42116300  | 0.06141300  |
| H | -3.39513000 | 3.63491900  | 0.04832300  | H | 0.76267800  | 4.37271400  | -0.88654200 |
| H | -0.96404800 | -1.05464900 | -0.38596900 | H | 4.62317600  | 1.32333100  | 1.37161800  |
| N | -0.84016500 | 0.00547500  | -0.42167200 | N | 3.85494000  | 1.66921900  | 0.81761000  |
| H | -0.03319500 | 0.06083600  | 1.57832500  | C | 2.88891900  | -0.56316800 | -0.22051800 |
| C | -1.56117200 | 2.42819000  | 2.32665200  | C | 4.11116900  | -1.10696000 | -0.97703700 |
| H | -2.21780000 | 3.29569500  | 2.19354900  | C | 3.97941000  | -2.30001900 | -1.70751300 |
| H | -0.57770100 | 2.81139900  | 2.62130800  | C | 5.35263800  | -0.46464300 | -0.98823200 |
| C | -2.09820900 | 1.54853500  | 3.48115500  | C | 5.05721400  | -2.83653900 | -2.40661600 |
| H | -2.17615800 | 2.17352800  | 4.37985900  | H | 3.02570500  | -2.81392900 | -1.72468300 |
| H | -3.11388300 | 1.21212500  | 3.22995100  | C | 6.43457500  | -1.00069800 | -1.68999600 |
| O | -1.24522700 | 0.46886300  | 3.77691600  | H | 5.48986900  | 0.47674700  | -0.47225900 |
| H | -1.53200000 | -0.32082700 | 3.27747900  | C | 6.29416500  | -2.19043000 | -2.39897900 |

**TS-4(R,R)**

|   |             |             |             |   |            |             |             |
|---|-------------|-------------|-------------|---|------------|-------------|-------------|
| C | -5.21282100 | 0.53873800  | -0.01356200 | H | 7.13497900 | -2.60737800 | -2.94413100 |
| C | -4.42043600 | 0.10458500  | 1.04834600  | C | 2.59412600 | -1.35578800 | 1.06983300  |
| C | -3.82636900 | -1.15420800 | 1.00134500  | C | 1.75989700 | -0.78896100 | 2.04301000  |
| C | -4.02674800 | -1.97773200 | -0.10893300 | C | 3.10194700 | -2.64088900 | 1.29292000  |
| C | -4.81633100 | -1.53410000 | -1.16642300 | C | 1.39064300 | -1.50518600 | 3.17779500  |
| C | -5.42850400 | -0.27259000 | -1.13239100 | H | 1.34577100 | 0.20391200  | 1.92474300  |
| H | -5.66579200 | 1.52607300  | 0.02291900  | C | 2.74320000 | -3.35295900 | 2.43800300  |
| H | -4.25938300 | 0.72305600  | 1.92327600  | H | 3.77119200 | -3.09873300 | 0.57682900  |
| H | -3.56499000 | -2.95821100 | -0.13828600 | C | 1.87847600 | -2.79510400 | 3.37815300  |
| H | -4.97146600 | -2.17845400 | -2.02864000 | H | 0.70711200 | -1.04609100 | 3.88131600  |
| C | -6.31834700 | 0.18911300  | -2.25856900 | H | 3.13903500 | -4.35318500 | 2.58651100  |
| H | -6.23892800 | 1.26959500  | -2.40816000 | H | 1.58230500 | -3.36149400 | 4.25506600  |
| H | -7.37060500 | -0.03775600 | -2.04856400 | C | 0.99422400 | 0.89507800  | -1.06205100 |
| H | -6.06196600 | -0.30449900 | -3.20101800 | H | 0.39629100 | 1.28107000  | -1.88220400 |
| S | -2.77058700 | -1.73022100 | 2.34508100  | C | 1.67933200 | -0.46934500 | -1.28499800 |
|   |             |             |             | H | 2.20754200 | -0.27669700 | -2.22919400 |



|                  |             |             |             |   |             |             |             |
|------------------|-------------|-------------|-------------|---|-------------|-------------|-------------|
| C                | 0.78507800  | -1.65270100 | -1.57409600 | C | -0.40997100 | 0.78200100  | 0.52113000  |
| C                | 0.44248800  | -1.87855300 | -2.91861100 | H | 2.06421900  | 3.81827900  | 2.00240500  |
| C                | 0.20205900  | -2.45974000 | -0.59200100 | H | 3.97817000  | 2.93369200  | 3.30698000  |
| C                | -0.47900900 | -2.86087700 | -3.27161100 | H | 4.31710700  | 0.50917900  | 3.62113300  |
| H                | 0.89302200  | -1.26234100 | -3.69272100 | H | 2.72429600  | -1.13260400 | 2.63425100  |
| C                | -0.72364900 | -3.44442100 | -0.94421900 | H | -0.04226900 | 2.86859000  | 0.38007500  |
| H                | 0.39976100  | -2.30590200 | 0.45543000  | N | 0.15211400  | 2.02346400  | 0.89445700  |
| C                | -1.07080400 | -3.64746900 | -2.27884400 | C | -1.48854500 | 0.73895000  | -0.35174200 |
| H                | -0.73493300 | -3.01164400 | -4.31602400 | C | -1.92220600 | -0.44391000 | -1.08303900 |
| H                | -1.18629200 | -4.01847700 | -0.14963000 | C | -3.29078000 | -0.60490800 | -1.39484300 |
| H                | -1.79743600 | -4.40866400 | -2.54622500 | C | -1.00429700 | -1.41352400 | -1.52790100 |
| C                | -1.98901600 | 2.32495400  | -0.82663200 | C | -3.72182300 | -1.70908900 | -2.11959000 |
| C                | -2.26373000 | 1.16636500  | -1.62726600 | H | -4.01011400 | 0.11625600  | -1.02572800 |
| C                | -3.06927700 | 1.23764600  | -2.77566800 | C | -1.43948600 | -2.50955400 | -2.25773000 |
| C                | -3.61609300 | 2.46699100  | -3.09010100 | H | 0.05300700  | -1.33484300 | -1.31807300 |
| C                | -3.37994900 | 3.62258500  | -2.29718700 | C | -2.79790700 | -2.66193600 | -2.55555300 |
| C                | -2.57467900 | 3.56380600  | -1.17943600 | H | -4.77817900 | -1.83226900 | -2.33473000 |
| C                | -1.13884800 | 1.91697900  | 0.23087600  | H | -0.70247100 | -3.23079600 | -2.59331000 |
| C                | -0.82242100 | 0.54223600  | -0.00337400 | H | -3.13518100 | -3.52097600 | -3.12766700 |
| H                | -3.26499600 | 0.35542800  | -3.37348500 | C | -2.22421100 | 1.99371100  | -0.61810600 |
| H                | -4.24948900 | 2.55462000  | -3.96724800 | C | -2.66626300 | 2.81066600  | 0.43910300  |
| H                | -3.83905900 | 4.56190300  | -2.58661500 | C | -2.51544100 | 2.37243000  | -1.94093900 |
| H                | -2.39127900 | 4.44733400  | -0.57631200 | C | -3.37993700 | 3.97608300  | 0.17599900  |
| H                | -1.70873300 | -0.85676300 | -1.33747300 | H | -2.47134300 | 2.50453300  | 1.46053900  |
| N                | -1.60829500 | 0.11304900  | -1.07720000 | C | -3.20861100 | 3.55124200  | -2.19920000 |
| H                | -0.55004500 | -0.17911800 | 0.75845800  | H | -2.17954300 | 1.74180300  | -2.75645200 |
| C                | -0.70919500 | 2.71726800  | 1.40631300  | C | -3.64524100 | 4.35297100  | -1.14259200 |
| H                | -1.00130200 | 3.76443400  | 1.27551200  | H | -3.73480900 | 4.58782900  | 0.99917500  |
| H                | 0.37880500  | 2.69543600  | 1.50624200  | H | -3.41217900 | 3.84254900  | -3.22446300 |
| C                | -1.26662700 | 2.17425400  | 2.74423400  | H | -4.19550000 | 5.26623100  | -1.34548300 |
| H                | -1.06196500 | 2.93904000  | 3.50991500  | C | 0.18782600  | -1.66858900 | 1.29572200  |
| H                | -2.35479400 | 2.05309600  | 2.67875500  | H | 1.11828100  | -2.22788300 | 1.22128400  |
| O                | -0.63951000 | 0.96515700  | 3.06636600  | C | -0.93699300 | -2.39369400 | 1.47787600  |
| H                | -1.35502700 | 0.28675300  | 3.20185400  | H | -0.78521300 | -3.46983100 | 1.41866400  |
|                  |             |             |             | C | -2.29892000 | -1.91783700 | 1.70700300  |
|                  |             |             |             | C | -2.58536600 | -0.72458200 | 2.39503200  |
|                  |             |             |             | C | -3.37349200 | -2.68044300 | 1.21963100  |
|                  |             |             |             | C | -3.89538200 | -0.28249200 | 2.53573800  |
|                  |             |             |             | H | -1.77148300 | -0.15663500 | 2.83205200  |
|                  |             |             |             | C | -4.68708600 | -2.23737500 | 1.36009100  |
|                  |             |             |             | H | -3.16328000 | -3.60818200 | 0.69723800  |
|                  |             |             |             | C | -4.95282200 | -1.03277300 | 2.00932600  |
|                  |             |             |             | H | -4.09998100 | 0.63763000  | 3.07522500  |
|                  |             |             |             | H | -5.50214600 | -2.83366600 | 0.96199400  |
| <b>(S)-INT-6</b> |             |             |             |   |             |             |             |
| C                | 1.45890600  | 0.42106400  | 1.80825700  |   |             |             |             |
| C                | 1.29337300  | 1.82368100  | 1.61510500  |   |             |             |             |
| C                | 2.19397500  | 2.75213800  | 2.15141800  |   |             |             |             |
| C                | 3.25842900  | 2.24361800  | 2.87730300  |   |             |             |             |
| C                | 3.45012300  | 0.85080600  | 3.06680500  |   |             |             |             |
| C                | 2.56284800  | -0.06638200 | 2.54510300  |   |             |             |             |
| C                | 0.37274000  | -0.24418100 | 1.18117500  |   |             |             |             |

|   |             |             |             |   |             |             |             |
|---|-------------|-------------|-------------|---|-------------|-------------|-------------|
| H | -5.97566900 | -0.68799200 | 2.12536200  | H | 0.94666900  | -2.46653200 | 1.18901000  |
| C | 2.07712700  | 1.73258700  | -1.99767200 | C | -1.12463000 | -0.45793100 | 3.77838300  |
| C | 2.11735000  | 0.33810900  | -1.92927000 | H | -0.26916800 | 1.30029900  | 2.88742800  |
| C | 3.06588700  | -0.29133500 | -1.12835900 | C | -1.17784600 | -1.85162300 | 3.76650000  |
| C | 4.00668900  | 0.47326700  | -0.43438200 | H | -0.49889800 | -3.64564500 | 2.78153300  |
| C | 3.97089700  | 1.85942400  | -0.52269700 | H | -1.71830500 | 0.10672300  | 4.49058700  |
| C | 2.99817500  | 2.51343800  | -1.29520400 | H | -1.82382300 | -2.37861000 | 4.46105200  |
| H | 1.32158800  | 2.21815400  | -2.61148700 | C | 2.84056900  | 0.06872800  | 1.15898200  |
| H | 1.41674000  | -0.26729200 | -2.49019100 | C | 3.71769500  | 0.84563900  | 0.37006100  |
| H | 4.73847200  | -0.02427200 | 0.19130600  | C | 3.39811600  | -0.94499000 | 1.96664400  |
| H | 4.69373500  | 2.45047000  | 0.03284700  | C | 5.08555600  | 0.60752400  | 0.37382600  |
| C | 2.96135400  | 4.01983100  | -1.36379700 | H | 3.31824400  | 1.61211600  | -0.28047000 |
| H | 2.04381900  | 4.37730400  | -1.84077100 | C | 4.76731700  | -1.18000100 | 1.96590400  |
| H | 3.02360800  | 4.46604500  | -0.36469600 | H | 2.75092600  | -1.54347500 | 2.59424600  |
| H | 3.80565000  | 4.41493200  | -1.94062800 | C | 5.61673200  | -0.41000600 | 1.16768200  |
| S | 3.10487600  | -2.09013700 | -0.97251000 | H | 5.73492200  | 1.20380300  | -0.25847400 |
| O | 4.27571400  | -2.55188600 | -1.73522800 | H | 5.17464700  | -1.96762400 | 2.59141100  |
| O | 3.19429300  | -2.32020300 | 0.50821300  | H | 6.68485600  | -0.60300800 | 1.16482400  |
| O | 1.77739900  | -2.53054400 | -1.52460100 | C | -0.49727800 | 0.38468900  | -0.94156900 |
| H | 1.19169200  | -3.99928200 | -0.36518600 | H | -1.46583100 | 0.14432800  | -1.36935700 |
| O | 1.19048400  | -4.50745300 | 0.46765100  | C | 0.52815900  | -0.60877100 | -0.94718200 |
| H | 2.03752900  | -4.20881200 | 0.83381200  | H | 0.19871600  | -1.63630700 | -0.81229300 |

**(S)-TS-5**

|   |             |             |             |   |             |             |             |
|---|-------------|-------------|-------------|---|-------------|-------------|-------------|
| C | -0.63342700 | 2.97233700  | -0.40658400 | C | 2.67565800  | -1.57513100 | -1.65653400 |
| C | 0.32838400  | 3.71184900  | 0.32975800  | C | 3.32430700  | 0.70344000  | -3.13816000 |
| C | 0.27952700  | 5.09847700  | 0.43107900  | H | 1.42419300  | 1.48228000  | -2.51088400 |
| C | -0.76472100 | 5.74652600  | -0.22838200 | C | 3.88240600  | -1.51025000 | -2.34635000 |
| C | -1.72101500 | 5.03248400  | -0.96949000 | H | 2.39341100  | -2.46712200 | -1.10536200 |
| C | -1.66018900 | 3.64536400  | -1.07286300 | C | 4.21384100  | -0.37368500 | -3.08509800 |
| C | -0.21882900 | 1.58684100  | -0.31911700 | H | 3.56398400  | 1.57810500  | -3.73519800 |
| C | 0.88959300  | 1.53191300  | 0.57768100  | H | 4.56249400  | -2.35531300 | -2.31299600 |
| H | 1.01903000  | 5.65448900  | 0.99782200  | H | 5.15045400  | -0.33197800 | -3.63240300 |
| H | -0.83669300 | 6.82746400  | -0.16803300 | C | -3.40937100 | 0.42618800  | 1.04140800  |
| H | -2.51897300 | 5.57253700  | -1.46761300 | C | -2.96944700 | -0.85821400 | 0.72481400  |
| H | -2.40086100 | 3.08790900  | -1.63514500 | C | -3.20039700 | -1.37579200 | -0.54929400 |
| H | 1.95291700  | 3.04666700  | 1.57215200  | C | -3.88615200 | -0.61475900 | -1.49864700 |
| N | 1.25175200  | 2.80788800  | 0.88622300  | C | -4.31715900 | 0.67076700  | -1.17244500 |
| C | 1.39681200  | 0.26996700  | 1.05867300  | C | -4.08519000 | 1.21270300  | 0.10101500  |
| C | 0.47028000  | -0.49631900 | 1.94416800  | H | -3.21835700 | 0.82321700  | 2.03455700  |
| C | 0.40471500  | -1.89877500 | 1.93677400  | H | -2.44243200 | -1.46683200 | 1.44646600  |
| C | -0.31233300 | 0.21599000  | 2.86891700  | H | -4.07108300 | -1.03124000 | -2.48302100 |
| C | -0.41801400 | -2.56656200 | 2.83803700  | H | -4.85374000 | 1.26082400  | -1.91160700 |
|   |             |             |             | C | -4.57505100 | 2.59295000  | 0.46422200  |

|   |             |             |             |
|---|-------------|-------------|-------------|
| H | -5.40136200 | 2.54123200  | 1.18262600  |
| H | -3.78136500 | 3.19180700  | 0.92246900  |
| H | -4.93725600 | 3.13346000  | -0.41479300 |
| S | -2.49967000 | -2.96732500 | -1.03632600 |
| O | -3.60751700 | -3.73687800 | -1.62629500 |
| O | -1.42880400 | -2.56881900 | -2.01527400 |
| O | -1.91733200 | -3.52633400 | 0.22625500  |
| H | -0.12162800 | -3.98532100 | -0.12794800 |
| O | 0.69493600  | -3.89921700 | -0.66258500 |
| H | 0.27864000  | -3.63097500 | -1.50111900 |

**(S)-INT-7**

|   |             |             |             |
|---|-------------|-------------|-------------|
| C | -1.58467300 | 1.69687100  | -0.73307900 |
| C | -1.60644400 | 2.23208800  | 0.58043500  |
| C | -2.68187100 | 2.95061500  | 1.07906400  |
| C | -3.77577900 | 3.12458700  | 0.22789300  |
| C | -3.78316200 | 2.59006300  | -1.06663500 |
| C | -2.69307000 | 1.87175100  | -1.55770500 |
| C | -0.32107300 | 0.98424000  | -0.84202000 |
| C | 0.33709200  | 1.13214900  | 0.40798000  |
| H | -2.68357500 | 3.34692600  | 2.08892300  |
| H | -4.64183100 | 3.67201400  | 0.58461000  |
| H | -4.65944600 | 2.72148800  | -1.69162900 |
| H | -2.71599200 | 1.43741900  | -2.55036200 |
| H | -0.18559600 | 2.00807800  | 2.20704300  |
| N | -0.39042100 | 1.88146300  | 1.22465300  |
| C | 1.66686800  | 0.45657800  | 0.48857600  |
| C | 1.86200500  | -0.17959900 | 1.86852000  |
| C | 1.70771300  | -1.54394400 | 2.12188700  |
| C | 2.14707400  | 0.68228500  | 2.94038000  |
| C | 1.84518700  | -2.03110500 | 3.42311500  |
| H | 1.46400900  | -2.24350200 | 1.33182400  |
| C | 2.26743100  | 0.19445800  | 4.23947400  |
| H | 2.31108500  | 1.73934600  | 2.74809900  |
| C | 2.11832500  | -1.17116900 | 4.48445000  |
| H | 1.72291700  | -3.09475100 | 3.60122500  |
| H | 2.49026300  | 0.87744700  | 5.05375700  |
| H | 2.21702500  | -1.55968500 | 5.49335500  |
| C | 2.80100600  | 1.45135100  | 0.18831700  |
| C | 4.12128100  | 1.04230300  | 0.41637000  |
| C | 2.57284200  | 2.71234000  | -0.36864300 |
| C | 5.18742900  | 1.86959600  | 0.08124900  |
| H | 4.30689900  | 0.06314500  | 0.84219300  |

|   |             |             |             |
|---|-------------|-------------|-------------|
| C | 3.64371200  | 3.54585600  | -0.70087100 |
| H | 1.56149000  | 3.05498600  | -0.55828000 |
| C | 4.95318900  | 3.12645700  | -0.48078400 |
| H | 6.20360800  | 1.52962700  | 0.25404300  |
| H | 3.44749100  | 4.52324000  | -1.13097700 |
| H | 5.78548800  | 3.77263400  | -0.74164500 |
| C | 0.34244500  | 0.02521200  | -1.55422400 |
| H | 0.09638600  | -0.33745500 | -2.54153200 |
| C | 1.48954500  | -0.54467800 | -0.76344700 |
| H | 1.07063000  | -1.46746200 | -0.35388000 |
| C | 2.72076500  | -0.89539600 | -1.55444200 |
| C | 3.37129600  | -2.11125900 | -1.31603100 |
| C | 3.23634500  | -0.02066500 | -2.51914100 |
| C | 4.53499700  | -2.43193300 | -2.01565700 |
| H | 2.94551200  | -2.81219300 | -0.60487700 |
| C | 4.39489800  | -0.34346400 | -3.22011100 |
| H | 2.74227400  | 0.92949200  | -2.69923400 |
| C | 5.05150400  | -1.54873600 | -2.96392500 |
| H | 5.03208200  | -3.37817100 | -1.82524400 |
| H | 4.78863300  | 0.34640200  | -3.96027200 |
| H | 5.95758600  | -1.80048600 | -3.50683600 |
| C | -5.31321600 | -0.81483000 | -1.59006300 |
| C | -4.05259200 | -1.37035500 | -1.37564100 |
| C | -3.44075900 | -1.22116400 | -0.13352000 |
| C | -4.08178700 | -0.52729300 | 0.89222900  |
| C | -5.33994000 | 0.02016400  | 0.66610100  |
| C | -5.97311100 | -0.10992100 | -0.57742500 |
| H | -5.79060800 | -0.92643000 | -2.56010800 |
| H | -3.52961500 | -1.90187300 | -2.16235800 |
| H | -3.57802900 | -0.40402100 | 1.84390400  |
| H | -5.83618900 | 0.56979300  | 1.46178800  |
| C | -7.31653700 | 0.53048800  | -0.82208200 |
| H | -8.00135200 | 0.35623600  | 0.01389200  |
| H | -7.22034200 | 1.61767900  | -0.93700000 |
| H | -7.78561400 | 0.14364000  | -1.73056100 |
| S | -1.81451800 | -1.92055700 | 0.16043400  |
| O | -1.15092900 | -0.96948900 | 1.09792100  |
| O | -1.99464000 | -3.28404300 | 0.71392200  |
| O | -1.16941300 | -1.94223000 | -1.20606500 |
| O | 0.75426400  | -3.81503100 | -0.15340700 |
| H | 0.01171800  | -3.99338200 | 0.44976900  |
| H | 0.27044100  | -3.38879600 | -0.88169400 |

**(R)-INT-6**

|   |             |             |             |
|---|-------------|-------------|-------------|
| C | 2.57875900  | 2.74153200  | 0.91442100  |
| C | 1.28797600  | 2.41228200  | 1.33078700  |
| C | 1.06196000  | 1.19001200  | 1.95445800  |
| C | 2.12206800  | 0.31462300  | 2.20169900  |
| C | 3.40394600  | 0.65949900  | 1.79139200  |
| C | 3.65082300  | 1.86871600  | 1.12649200  |
| H | 2.75118900  | 3.68808600  | 0.40835100  |
| H | 0.44997900  | 3.07406500  | 1.15020400  |
| H | 1.93099000  | -0.65257000 | 2.65364200  |
| H | 4.22038700  | -0.04010000 | 1.94695300  |
| C | 5.03866300  | 2.19229500  | 0.63309200  |
| H | 5.06662800  | 3.15651200  | 0.11794300  |
| H | 5.75814400  | 2.23256700  | 1.45857700  |
| H | 5.39079100  | 1.42265000  | -0.06335700 |
| S | -0.60994300 | 0.68855400  | 2.37904300  |
| O | -0.65381800 | 0.49660100  | 3.84018100  |
| O | -1.48843000 | 1.75545100  | 1.82193200  |
| O | -0.80032900 | -0.61649400 | 1.62577900  |
| C | -0.36970400 | 2.44503000  | -1.66852600 |
| C | -1.71668300 | 2.82403400  | -1.39621300 |
| C | -2.13946600 | 4.16017200  | -1.47494300 |
| C | -1.18788800 | 5.10411800  | -1.81504100 |
| C | 0.16204700  | 4.75136100  | -2.07767600 |
| C | 0.57702100  | 3.43830700  | -2.00120400 |
| C | -0.25013600 | 1.04172700  | -1.44601800 |
| C | -1.57458900 | 0.58013000  | -1.08468700 |
| H | -3.16459400 | 4.43966300  | -1.25850500 |
| H | -1.47738900 | 6.14865000  | -1.87312500 |
| H | 0.87193700  | 5.53195600  | -2.32880100 |
| H | 1.61418500  | 3.17261300  | -2.17104600 |
| H | -3.35844400 | 1.67957200  | -0.73539400 |
| N | -2.40964200 | 1.70588200  | -1.07200100 |
| C | -2.08048600 | -0.68639500 | -0.80044200 |
| C | -1.38204900 | -1.91011200 | -1.21545600 |
| C | -1.21850000 | -2.95668800 | -0.29298700 |
| C | -0.86735600 | -2.04258900 | -2.51469200 |
| C | -0.48498800 | -4.08459700 | -0.64616100 |
| H | -1.58533100 | -2.83488000 | 0.71767900  |
| C | -0.17010600 | -3.18960900 | -2.87374900 |
| H | -1.00976700 | -1.23728400 | -3.22707100 |
| C | 0.03726400  | -4.20461400 | -1.93485900 |
| H | -0.30478500 | -4.85286900 | 0.09739700  |
| H | 0.22314300  | -3.29006800 | -3.88029500 |

|   |             |             |             |
|---|-------------|-------------|-------------|
| H | 0.60913900  | -5.08559200 | -2.20908000 |
| C | -3.40646500 | -0.85788700 | -0.19446500 |
| C | -3.85806600 | -0.02745400 | 0.85372400  |
| C | -4.24114300 | -1.89551900 | -0.65711100 |
| C | -5.12085700 | -0.22970200 | 1.40058900  |
| H | -3.18286600 | 0.71323400  | 1.27589400  |
| C | -5.50912000 | -2.07404800 | -0.11611800 |
| H | -3.89243500 | -2.54209500 | -1.45421000 |
| C | -5.95211400 | -1.24189300 | 0.91451100  |
| H | -5.44765200 | 0.39427800  | 2.22619200  |
| H | -6.14952300 | -2.86517400 | -0.49273300 |
| H | -6.93690500 | -1.39135100 | 1.34655800  |
| C | 1.02391900  | 0.38326300  | -1.48508500 |
| H | 1.76927600  | 0.89515900  | -2.08695700 |
| C | 1.39800400  | -0.68882800 | -0.74532400 |
| H | 0.67794200  | -1.10789100 | -0.05511700 |
| C | 2.71431300  | -1.30188300 | -0.72467400 |
| C | 3.77861900  | -0.88000600 | -1.54495100 |
| C | 2.93745500  | -2.35244700 | 0.18760700  |
| C | 5.02770200  | -1.48018000 | -1.44851200 |
| H | 3.62993600  | -0.07473400 | -2.25674400 |
| C | 4.19064600  | -2.95082300 | 0.27859500  |
| H | 2.13282500  | -2.66751500 | 0.84786400  |
| C | 5.23999300  | -2.51755000 | -0.53386800 |
| H | 5.83998000  | -1.14264900 | -2.08520700 |
| H | 4.35066200  | -3.75284600 | 0.99264000  |
| H | 6.21840300  | -2.98222600 | -0.45790400 |
| H | 0.55004700  | -2.78799500 | 3.40917500  |
| O | 0.54838300  | -2.80989800 | 2.44427400  |
| H | 0.02546500  | -2.01014100 | 2.20084400  |

**(R)-TS-5**

|   |             |             |             |
|---|-------------|-------------|-------------|
| C | -3.92179100 | 1.49216100  | -1.06315100 |
| C | -3.53224400 | 0.64613700  | -0.02671500 |
| C | -2.63460800 | 1.10318900  | 0.93912400  |
| C | -2.14443800 | 2.40987300  | 0.88236800  |
| C | -2.53472700 | 3.24115200  | -0.16619400 |
| C | -3.42489000 | 2.79982900  | -1.15450600 |
| H | -4.62031200 | 1.13372600  | -1.81570400 |
| H | -3.88763500 | -0.37642600 | 0.02317100  |
| H | -1.44563600 | 2.76379600  | 1.63414300  |
| H | -2.13388400 | 4.24989700  | -0.22140700 |
| C | -3.86208300 | 3.71956800  | -2.26749000 |

|   |             |             |             |                  |             |             |             |
|---|-------------|-------------|-------------|------------------|-------------|-------------|-------------|
| H | -4.15809700 | 3.15903100  | -3.15916200 | C                | -0.45101800 | 0.36508300  | -1.10132700 |
| H | -4.72479100 | 4.32399600  | -1.96187100 | H                | -1.00541300 | 1.12317500  | -1.64649100 |
| H | -3.06458000 | 4.41362200  | -2.54895000 | C                | 0.54616400  | 0.74151600  | -0.12331100 |
| S | -2.09375300 | -0.03308700 | 2.23262700  | H                | 0.24884500  | 0.51300400  | 0.90698300  |
| O | -3.08564100 | 0.03375200  | 3.31855300  | C                | 1.31617000  | 1.96772200  | -0.27986500 |
| O | -1.96432000 | -1.34714500 | 1.54198000  | C                | 1.66920100  | 2.44143000  | -1.55673600 |
| O | -0.73113900 | 0.49544600  | 2.62806400  | C                | 1.72477400  | 2.68610600  | 0.85842400  |
| C | -1.72295300 | -1.90642600 | -1.59239500 | C                | 2.40361800  | 3.61331800  | -1.69571200 |
| C | -1.37208000 | -3.14446900 | -0.99729600 | H                | 1.38538600  | 1.86678500  | -2.43382000 |
| C | -2.18952600 | -4.26422000 | -1.06810700 | C                | 2.45935200  | 3.85893500  | 0.71387000  |
| C | -3.39285200 | -4.12777500 | -1.76073800 | H                | 1.42767300  | 2.35311300  | 1.84587700  |
| C | -3.75848500 | -2.91256600 | -2.35949500 | C                | 2.80159400  | 4.32241300  | -0.55910000 |
| C | -2.93250500 | -1.79313300 | -2.27709200 | H                | 2.67621100  | 3.96916500  | -2.68434600 |
| C | -0.66196900 | -0.98680200 | -1.23213700 | H                | 2.75167500  | 4.41733800  | 1.59699700  |
| C | 0.33680100  | -1.74590700 | -0.54872100 | H                | 3.37673700  | 5.23728000  | -0.66655300 |
| H | -1.91372600 | -5.20073700 | -0.59551600 | H                | -0.75110800 | 3.27790500  | 4.14967300  |
| H | -4.06124100 | -4.97940500 | -1.83185600 | O                | -0.09431900 | 2.97128200  | 3.51288800  |
| H | -4.70311000 | -2.84375900 | -2.88849800 | H                | -0.35283200 | 2.03831300  | 3.34262100  |
| H | -3.22206400 | -0.85006000 | -2.72581700 |                  |             |             |             |
| H | 0.36911200  | -3.71498800 | 0.14240100  |                  |             |             |             |
| N | -0.11382700 | -2.99995100 | -0.38218900 | <b>(R)-INT-7</b> |             |             |             |
| C | 1.58646800  | -1.11501600 | -0.16104600 | C                | -4.25102000 | 0.77566200  | -1.00633700 |
| C | 2.52549600  | -0.78343100 | -1.27711600 | C                | -3.63836900 | 0.30230400  | 0.14954100  |
| C | 3.60608300  | 0.08914000  | -1.05768300 | C                | -2.71420700 | 1.10418300  | 0.82515800  |
| C | 2.35089800  | -1.31882800 | -2.56313100 | C                | -2.42067900 | 2.38386800  | 0.35031800  |
| C | 4.48392000  | 0.40796500  | -2.08883500 | C                | -3.03629500 | 2.84218500  | -0.81613900 |
| H | 3.73970800  | 0.53509600  | -0.07972300 | C                | -3.95688400 | 2.05097000  | -1.51276700 |
| C | 3.22211800  | -0.98466500 | -3.59824200 | H                | -4.97189200 | 0.14946800  | -1.52644700 |
| H | 1.53737700  | -2.01017800 | -2.75366500 | H                | -3.85474900 | -0.69276400 | 0.52178300  |
| C | 4.29367800  | -0.12250500 | -3.36524300 | H                | -1.70737000 | 3.01186700  | 0.87380400  |
| H | 5.30603200  | 1.08974000  | -1.89674700 | H                | -2.79373100 | 3.83365400  | -1.18942000 |
| H | 3.07017500  | -1.41253200 | -4.58431900 | C                | -4.64398100 | 2.56679000  | -2.75254400 |
| H | 4.97602900  | 0.13110100  | -4.17035500 | H                | -4.85514100 | 1.75964100  | -3.46076100 |
| C | 2.15846800  | -1.57539500 | 1.13713000  | H                | -5.60286800 | 3.03696800  | -2.50274200 |
| C | 1.29763000  | -1.75598700 | 2.23705100  | H                | -4.03593300 | 3.31888800  | -3.26299400 |
| C | 3.52002900  | -1.89985500 | 1.28402700  | S                | -1.89868600 | 0.43676900  | 2.29154200  |
| C | 1.79540000  | -2.21539300 | 3.45205200  | O                | -2.93547500 | 0.29611600  | 3.32479200  |
| H | 0.24622400  | -1.50986000 | 2.15344900  | O                | -1.29229000 | -0.84721900 | 1.82493400  |
| C | 4.00850800  | -2.36521700 | 2.50173000  | O                | -0.83542200 | 1.45721100  | 2.60293000  |
| H | 4.19308100  | -1.80764300 | 0.44100900  | C                | -1.67736900 | -2.18691800 | -1.20092100 |
| C | 3.15072300  | -2.51774500 | 3.59208100  | C                | -1.19257100 | -3.27169000 | -0.42665500 |
| H | 1.11711500  | -2.32396700 | 4.29192900  | C                | -1.87228500 | -4.47214800 | -0.30769500 |
| H | 5.06114200  | -2.61357500 | 2.59590600  | C                | -3.08240000 | -4.58556100 | -0.99909700 |
| H | 3.53653900  | -2.87180900 | 4.54321500  | C                | -3.57692400 | -3.53136500 | -1.77671400 |

C -2.88254300 -2.32430100 -1.88363800  
 C -0.71033800 -1.11404800 -1.01706100  
 C 0.32611000 -1.64444800 -0.18744600  
 H -1.49179600 -5.28517400 0.30096200  
 H -3.64770300 -5.50859800 -0.92741600  
 H -4.51919300 -3.65341100 -2.30027200  
 H -3.27528600 -1.50355500 -2.47153400  
 H 0.57738100 -3.41860200 0.83483200  
 N 0.05098800 -2.88990100 0.15028200  
 C 1.45684400 -0.70500400 0.04267800  
 C 2.53266200 -0.88660500 -1.04516900  
 C 3.74155800 -0.19586900 -0.88991000  
 C 2.33872400 -1.65700800 -2.19478200  
 C 4.72719200 -0.26392300 -1.86829000  
 H 3.89726900 0.40705400 -0.00290400  
 C 3.33022700 -1.72698300 -3.17687200  
 H 1.41582400 -2.20653800 -2.34317600  
 C 4.52481200 -1.02910000 -3.01882100  
 H 5.65234800 0.28751900 -1.73464000  
 H 3.16346600 -2.33254500 -4.06236600  
 H 5.29436800 -1.08267900 -3.78243500  
 C 2.06705400 -0.92149300 1.42883200  
 C 1.78092800 -0.11935300 2.53284100  
 C 2.89699500 -2.04343500 1.59839500  
 C 2.32733800 -0.42742900 3.78034500  
 H 1.09529600 0.71301500 2.45891100  
 C 3.42930100 -2.35474700 2.84734900  
 H 3.15357900 -2.65702200 0.73933500  
 C 3.14810000 -1.54047600 3.94563500  
 H 2.08669200 0.20632400 4.62772500  
 H 4.07100300 -3.22372300 2.95797400  
 H 3.56421900 -1.77532600 4.92046200  
 C -0.50959300 0.22871000 -1.11337100  
 H -1.13890200 0.94303800 -1.63016800  
 C 0.65168800 0.66950400 -0.26188500  
 H 0.18964700 0.94578600 0.69626600  
 C 1.41070400 1.85946900 -0.77776000  
 C 1.78513300 1.95282700 -2.12534800  
 C 1.71766800 2.91134900 0.09163200  
 C 2.47241700 3.06965300 -2.59190200  
 H 1.55539100 1.13625800 -2.80360200  
 C 2.40492600 4.03082100 -0.37673800  
 H 1.38681100 2.88289500 1.12306300  
 C 2.78884300 4.10991200 -1.71521800

H 2.76314000 3.12766300 -3.63640900  
 H 2.62223500 4.84498500 0.30687200  
 H 3.32403100 4.98226900 -2.07832700  
 H -0.87674200 4.63789400 2.87818300  
 O -0.26974100 4.09881700 2.35688100  
 H -0.51848800 3.17854500 2.58464100

**INT-8**

C -5.95036400 0.32697200 0.01474200  
 C -4.85680900 -0.42151600 0.44596800  
 C -4.33059900 -1.40384400 -0.39482300  
 C -4.90295200 -1.64894800 -1.64385600  
 C -5.99466600 -0.88923600 -2.06132800  
 C -6.53313900 0.11171800 -1.24092700  
 H -6.35560500 1.09678300 0.66585600  
 H -4.41388100 -0.22900800 1.41691500  
 H -4.48492400 -2.42731300 -2.27264700  
 H -6.43858300 -1.07783700 -3.03533800  
 C -7.73184300 0.91310100 -1.68329200  
 H -7.79435600 0.97145200 -2.77369900  
 H -8.66268600 0.45553800 -1.32663600  
 H -7.69901500 1.93224400 -1.28719100  
 S -2.80175200 -2.25477400 0.02181900  
 O -2.74152400 -2.33608700 1.51204500  
 O -2.81889500 -3.54726400 -0.68116900  
 O -1.74613600 -1.29793800 -0.50411200  
 C 3.05931700 2.45647400 -0.34855700  
 C 4.08538800 2.07702100 -1.24943800  
 C 4.99064000 2.98271300 -1.77957600  
 C 4.84454900 4.31746100 -1.38694700  
 C 3.83486400 4.71170300 -0.49926300  
 C 2.93198300 3.78888000 0.03240500  
 C 2.33762900 1.23215200 -0.04030400  
 C 2.97331200 0.17723300 -0.76153200  
 H 5.77109600 2.67856900 -2.46888300  
 H 5.52859000 5.06057300 -1.78306800  
 H 3.74561700 5.75670200 -0.22261800  
 H 2.14619000 4.10091400 0.70986500  
 H 4.55062100 0.13866900 -2.11577500  
 N 3.98618300 0.67061200 -1.46666100  
 C 2.24787400 -1.13041200 -0.68023600  
 C 3.07414900 -2.34198200 -0.28603600  
 C 2.41823200 -3.57741000 -0.20322900

|   |             |             |             |             |             |             |             |
|---|-------------|-------------|-------------|-------------|-------------|-------------|-------------|
| C | 4.42881800  | -2.26707100 | 0.03665000  | H           | 0.43565600  | 6.38719600  | -0.81823200 |
| C | 3.11004200  | -4.71366800 | 0.20032900  | H           | 0.58577600  | 6.57546800  | 1.64610900  |
| H | 1.36321700  | -3.63948000 | -0.45040100 | H           | -0.23384000 | 4.75301200  | 3.11299900  |
| C | 5.12595100  | -3.41039600 | 0.43603300  | H           | -1.81983500 | 1.85184200  | -1.19067400 |
| H | 4.94976800  | -1.31528400 | 0.00322100  | N           | -1.51656100 | 2.21041200  | -0.27863100 |
| C | 4.46843300  | -4.63440200 | 0.52010400  | H           | -2.31939500 | 0.59643500  | 0.85327600  |
| H | 2.58742700  | -5.66218500 | 0.26903800  | C           | -1.62092900 | 1.92423200  | 3.43108900  |
| H | 6.17933200  | -3.33674600 | 0.68796700  | H           | -0.77404200 | 2.31909100  | 4.00887700  |
| H | 5.00666000  | -5.52239800 | 0.83588600  | H           | -2.52155200 | 2.38946200  | 3.85528800  |
| C | 1.64257000  | -1.28724300 | -2.10095900 | C           | -1.70540600 | 0.41486900  | 3.67366600  |
| C | 0.52180300  | -0.54730800 | -2.48511600 | H           | -1.65290700 | 0.22657400  | 4.75804200  |
| C | 2.28974100  | -2.08803400 | -3.05136800 | H           | -0.83516900 | -0.07519500 | 3.21981500  |
| C | 0.01835000  | -0.64381600 | -3.78104000 | O           | -2.91550600 | -0.10207200 | 3.14741000  |
| H | 0.01927600  | 0.09914700  | -1.77857600 | H           | -2.75155000 | -0.95225400 | 2.69194300  |
| C | 1.79457200  | -2.17303600 | -4.35194300 | O           | -2.51007700 | 0.57732400  | -2.32815500 |
| H | 3.15953000  | -2.66974800 | -2.76800700 | H           | -2.25587300 | -0.19560400 | -1.76658200 |
| C | 0.65492100  | -1.45642600 | -4.71823600 | H           | -3.47642700 | 0.55722100  | -2.31740800 |
| H | -0.88340800 | -0.09382300 | -4.02529900 |             |             |             |             |
| H | 2.29456900  | -2.81210400 | -5.07343500 |             |             |             |             |
| H | 0.26271000  | -1.53563700 | -5.72738100 |             |             |             |             |
| C | 1.24862900  | 0.72049900  | 0.60620200  | <b>TS-6</b> |             |             |             |
| H | 0.53365500  | 1.26769500  | 1.21249000  | C           | 5.09097700  | 0.40963900  | 0.50347600  |
| C | 1.14940700  | -0.76163200 | 0.43005100  | C           | 4.26626900  | -0.68918400 | 0.26391300  |
| H | 0.14459400  | -1.03669200 | 0.08019200  | C           | 3.75451000  | -1.40684500 | 1.34385800  |
| C | 1.34585000  | -1.40340300 | 1.80011900  | C           | 4.10862400  | -1.06306800 | 2.65110000  |
| C | 2.47000400  | -1.10761500 | 2.58197500  | C           | 4.93473400  | 0.03689500  | 2.87514400  |
| C | 0.37709200  | -2.28254600 | 2.29286600  | C           | 5.42792200  | 0.79907600  | 1.80489200  |
| C | 2.63936900  | -1.70827500 | 3.82729600  | H           | 5.47520400  | 0.97659300  | -0.34023200 |
| H | 3.22164400  | -0.41606700 | 2.21463300  | H           | 4.02946700  | -0.97960700 | -0.75190600 |
| C | 0.54617300  | -2.87695800 | 3.54297900  | H           | 3.72536200  | -1.65183000 | 3.47790100  |
| H | -0.52196500 | -2.48322700 | 1.72246100  | H           | 5.20532300  | 0.30707800  | 3.89265600  |
| C | 1.67677300  | -2.59621000 | 4.31044200  | C           | 6.33238200  | 1.98104200  | 2.04854200  |
| H | 3.51812000  | -1.47831500 | 4.42200400  | H           | 6.14686000  | 2.43299600  | 3.02720000  |
| H | -0.21648300 | -3.55453900 | 3.91316900  | H           | 7.38676500  | 1.68027300  | 2.02267400  |
| H | 1.80516500  | -3.05993100 | 5.28372400  | H           | 6.19535000  | 2.75116900  | 1.28386900  |
| C | -0.86530200 | 3.50793800  | 1.45483000  | S           | 2.46965100  | -2.65119000 | 1.12141100  |
| C | -0.93106000 | 3.41771200  | 0.02799200  | O           | 2.48407300  | -3.05082000 | -0.31612900 |
| C | -0.46363400 | 4.44129300  | -0.80265900 | O           | 2.73485500  | -3.72099300 | 2.09260700  |
| C | 0.07314200  | 5.57289900  | -0.19830200 | O           | 1.20708700  | -1.86098600 | 1.42626300  |
| C | 0.16129600  | 5.67787700  | 1.20599900  | C           | -1.92151700 | 3.23462500  | 0.21816300  |
| C | -0.29522500 | 4.65596000  | 2.03275400  | C           | -2.95329600 | 3.29872000  | 1.20051100  |
| C | -1.46209800 | 2.30362800  | 1.98524400  | C           | -3.48555000 | 4.50145400  | 1.65549100  |
| C | -1.85883000 | 1.56562400  | 0.89273400  | C           | -2.98600600 | 5.67353800  | 1.09308400  |
| H | -0.52802200 | 4.35686400  | -1.88312900 | C           | -1.98954800 | 5.63566400  | 0.10371500  |
|   |             |             |             | C           | -1.45141100 | 4.43038500  | -0.33763100 |

|   |             |             |             |              |             |             |             |
|---|-------------|-------------|-------------|--------------|-------------|-------------|-------------|
| C | -1.64774600 | 1.82006900  | 0.03450800  | H            | -0.21684800 | -4.74858000 | -1.90360800 |
| C | -2.54391300 | 1.12593100  | 0.84250000  | H            | -1.21006700 | -4.27936200 | -4.13980700 |
| H | -4.26498500 | 4.52459500  | 2.41020800  | C            | 2.13576800  | 1.88607200  | -2.26907300 |
| H | -3.37990000 | 6.63007700  | 1.42041300  | C            | 1.60387100  | 2.15882700  | -0.99088600 |
| H | -1.63326200 | 6.56595500  | -0.32665100 | C            | 1.61939700  | 3.42220900  | -0.42137100 |
| H | -0.68081900 | 4.41613800  | -1.09784100 | C            | 2.15966100  | 4.46009700  | -1.18800500 |
| H | -4.04968700 | 1.71776200  | 2.17746200  | C            | 2.65717800  | 4.22060000  | -2.47694900 |
| N | -3.30474700 | 1.98542900  | 1.55155600  | C            | 2.65382300  | 2.93731300  | -3.02876300 |
| C | -2.62669300 | -0.35080500 | 0.61634300  | C            | 2.07056100  | 0.43750400  | -2.46391000 |
| C | -3.83604700 | -0.70804900 | -0.25440300 | C            | 1.54405800  | -0.08942900 | -1.33126300 |
| C | -4.10033300 | -2.05631300 | -0.54174700 | H            | 1.22679400  | 3.59437400  | 0.57440000  |
| C | -4.63187300 | 0.26802400  | -0.86199400 | H            | 2.19508400  | 5.46352600  | -0.77624300 |
| C | -5.13492400 | -2.41468600 | -1.39931300 | H            | 3.06726700  | 5.04675600  | -3.04937200 |
| H | -3.47387100 | -2.82675700 | -0.10934600 | H            | 3.06659600  | 2.75792700  | -4.01627700 |
| C | -5.66882300 | -0.09046100 | -1.72689500 | H            | 1.23005100  | 0.81262600  | 0.58876300  |
| H | -4.44472000 | 1.32035400  | -0.68130000 | N            | 1.11299500  | 0.94454500  | -0.44642900 |
| C | -5.92571900 | -1.43180300 | -1.99718800 | H            | 1.39667900  | -1.11728300 | -1.04675300 |
| H | -5.31300700 | -3.46405100 | -1.61143400 | C            | 2.52850700  | -0.30458100 | -3.68151200 |
| H | -6.27201400 | 0.68560700  | -2.18808000 | H            | 1.85926300  | -0.06184700 | -4.52013400 |
| H | -6.73014600 | -1.71077000 | -2.67054200 | H            | 3.52528300  | 0.05241700  | -3.97132400 |
| C | -2.60018200 | -1.06749400 | 1.97511200  | C            | 2.59402500  | -1.82605600 | -3.51087700 |
| C | -1.49029900 | -0.87265100 | 2.80844100  | H            | 2.77155400  | -2.27310100 | -4.49921400 |
| C | -3.68262500 | -1.80444600 | 2.47043400  | H            | 1.62646200  | -2.20519100 | -3.15740600 |
| C | -1.43294200 | -1.45049300 | 4.07210700  | O            | 3.64770900  | -2.18905400 | -2.64013600 |
| H | -0.66603300 | -0.25173400 | 2.48497700  | H            | 3.27545200  | -2.61969700 | -1.84543300 |
| C | -3.62889900 | -2.37838400 | 3.74220800  | O            | 1.41716300  | 0.61932200  | 2.24864200  |
| H | -4.57176300 | -1.93950800 | 1.86808800  | H            | 1.39723500  | -0.37014200 | 2.12285500  |
| C | -2.50047000 | -2.21563000 | 4.54276000  | H            | 2.33258900  | 0.80179800  | 2.50423100  |
| H | -0.54863900 | -1.30155800 | 4.68277000  |              |             |             |             |
| H | -4.47506900 | -2.95616900 | 4.10157600  |              |             |             |             |
| H | -2.45493700 | -2.67442400 | 5.52550300  |              |             |             |             |
| C | -0.91051300 | 0.88647800  | -0.74260600 | <b>INT-9</b> |             |             |             |
| H | -0.67598300 | 1.06046900  | -1.78667500 | C            | 4.77633900  | -1.95890700 | -0.88582700 |
| C | -1.26609300 | -0.52756500 | -0.26372600 | C            | 3.71589500  | -2.76338900 | -0.48048400 |
| H | -0.50348400 | -0.84230700 | 0.45115300  | C            | 3.15992700  | -2.57580900 | 0.78625600  |
| C | -1.28051000 | -1.56446400 | -1.35814000 | C            | 3.71916500  | -1.65290600 | 1.66856700  |
| C | -1.82880800 | -1.30202900 | -2.61978500 | C            | 4.78187400  | -0.85605100 | 1.24899100  |
| C | -0.71096100 | -2.81750800 | -1.10827300 | C            | 5.30054200  | -0.96813400 | -0.04524500 |
| C | -1.80692400 | -2.27474500 | -3.61532900 | H            | 5.18701700  | -2.08493900 | -1.88404900 |
| H | -2.29754900 | -0.34244800 | -2.81787900 | H            | 3.29252200  | -3.48687400 | -1.16452700 |
| C | -0.68616300 | -3.79154200 | -2.10631500 | H            | 3.30432800  | -1.53915000 | 2.66187200  |
| H | -0.24645400 | -3.00634900 | -0.14758300 | H            | 5.19294400  | -0.11342200 | 1.92736500  |
| C | -1.23450300 | -3.52355300 | -3.36064400 | C            | 6.35494000  | -0.01071700 | -0.53855600 |
| H | -2.23851700 | -2.06057600 | -4.58832700 | H            | 7.02089900  | 0.30614400  | 0.26946600  |
|   |             |             |             | H            | 6.96429000  | -0.45556200 | -1.33056300 |



|   |             |             |             |             |             |             |             |
|---|-------------|-------------|-------------|-------------|-------------|-------------|-------------|
| H | 5.88540500  | 0.89236500  | -0.94868400 | C           | -1.54022800 | -0.35219900 | -0.68541700 |
| S | 1.61887600  | -3.40829400 | 1.19990500  | H           | -0.79561700 | -0.97773900 | -0.19241700 |
| O | 0.63160200  | -2.85732900 | 0.17602300  | C           | -2.21960200 | -1.22044100 | -1.71283800 |
| O | 1.81697300  | -4.85728700 | 1.08374800  | C           | -2.96158500 | -0.66287600 | -2.76225100 |
| O | 1.26469000  | -2.91258800 | 2.57188100  | C           | -2.09131200 | -2.61162700 | -1.62500300 |
| C | -0.44136800 | 3.28335200  | -0.13931900 | C           | -3.58215200 | -1.48283100 | -3.69999100 |
| C | -1.01449900 | 3.64551400  | 1.11031100  | H           | -3.07241600 | 0.41514400  | -2.82969800 |
| C | -0.78652400 | 4.87448100  | 1.71449600  | C           | -2.71589000 | -3.43144200 | -2.56514500 |
| C | 0.03385400  | 5.77230800  | 1.02956800  | H           | -1.47851400 | -3.04687200 | -0.84134800 |
| C | 0.60598100  | 5.43758700  | -0.20639700 | C           | -3.46406500 | -2.87081600 | -3.59986300 |
| C | 0.37941800  | 4.19692600  | -0.79874300 | H           | -4.15967100 | -1.04052700 | -4.50588600 |
| C | -0.89932800 | 1.92618700  | -0.39911700 | H           | -2.60348600 | -4.50844500 | -2.49333700 |
| C | -1.74687200 | 1.56751400  | 0.67435300  | H           | -3.94704800 | -3.51118600 | -4.33161100 |
| H | -1.22623800 | 5.12870500  | 2.67321100  | C           | 2.72639400  | 1.70010900  | -1.30745600 |
| H | 0.23662800  | 6.74380200  | 1.46770100  | C           | 2.57792100  | 1.90754200  | 0.09909000  |
| H | 1.25365400  | 6.14994700  | -0.70497300 | C           | 3.08155600  | 3.04099000  | 0.73451800  |
| H | 0.86457500  | 3.93278700  | -1.73029000 | C           | 3.73888900  | 3.98251200  | -0.05282300 |
| H | -2.34312000 | 2.53605100  | 2.41934100  | C           | 3.90032300  | 3.79806200  | -1.44135900 |
| N | -1.80547100 | 2.56103700  | 1.56336900  | C           | 3.40250500  | 2.66422900  | -2.07415400 |
| C | -2.45663100 | 0.26188800  | 0.49906900  | C           | 2.11216100  | 0.43402400  | -1.61615400 |
| C | -3.88356100 | 0.48755900  | -0.02721700 | C           | 1.63254800  | -0.05421100 | -0.40567600 |
| C | -4.76463300 | -0.60105400 | -0.04495900 | H           | 2.95609100  | 3.18743600  | 1.80225900  |
| C | -4.30640200 | 1.70962900  | -0.55624700 | H           | 4.14199200  | 4.87577200  | 0.41417600  |
| C | -6.03664400 | -0.47191400 | -0.59184200 | H           | 4.42897400  | 4.54973800  | -2.01922400 |
| H | -4.43982200 | -1.55473400 | 0.35492600  | H           | 3.54034500  | 2.52098500  | -3.14193700 |
| C | -5.58610100 | 1.84030400  | -1.10111700 | H           | 1.65293000  | 0.60698000  | 1.58444000  |
| H | -3.64272200 | 2.56764200  | -0.56150400 | N           | 1.88856800  | 0.82658500  | 0.60559300  |
| C | -6.45295300 | 0.75055600  | -1.12349400 | H           | 1.20143900  | -1.01717900 | -0.18511500 |
| H | -6.70170700 | -1.32935500 | -0.60837500 | C           | 2.12502000  | -0.25031100 | -2.95088000 |
| H | -5.89991400 | 2.79708100  | -1.50692600 | H           | 1.94094900  | 0.49956100  | -3.73500400 |
| H | -7.44606100 | 0.85110200  | -1.54976600 | H           | 3.13741200  | -0.63477300 | -3.13696100 |
| C | -2.48799500 | -0.50295700 | 1.82621300  | C           | 1.14707400  | -1.42051500 | -3.17748700 |
| C | -1.64852600 | -1.57857000 | 2.12231700  | H           | 1.16609400  | -1.64681200 | -4.25065800 |
| C | -3.36477000 | -0.03367500 | 2.82158600  | H           | 0.11766000  | -1.11590000 | -2.94790800 |
| C | -1.67818700 | -2.16814000 | 3.39198500  | O           | 1.48915200  | -2.61218800 | -2.51131600 |
| H | -0.94897300 | -1.98367800 | 1.40084700  | H           | 1.10542800  | -2.65509300 | -1.61341100 |
| C | -3.38846900 | -0.61683300 | 4.08518800  | O           | 1.04305200  | -0.24172300 | 3.01860200  |
| H | -4.06054500 | 0.76797100  | 2.58753900  | H           | 1.16330600  | -1.21469500 | 2.87550100  |
| C | -2.53991000 | -1.68876900 | 4.37510400  | H           | 0.10208600  | -0.16959500 | 3.21990300  |
| H | -0.99036700 | -2.98303800 | 3.58893400  |             |             |             |             |
| H | -4.07433300 | -0.24145000 | 4.83866500  |             |             |             |             |
| H | -2.55518900 | -2.14636600 | 5.35919300  | <b>TS-7</b> |             |             |             |
| C | -0.80233300 | 0.84744100  | -1.25188900 | C           | 4.71187200  | -1.54781700 | -0.60883400 |
| H | -0.38937800 | 0.85473000  | -2.24786000 | C           | 3.57288200  | -2.32984000 | -0.44652600 |

|   |             |             |             |   |             |             |             |
|---|-------------|-------------|-------------|---|-------------|-------------|-------------|
| C | 3.00548500  | -2.45990700 | 0.82386300  | C | -3.38673600 | 0.16795600  | 2.91605300  |
| C | 3.60737600  | -1.85269500 | 1.92472200  | C | -1.91401900 | -2.11485300 | 3.49651500  |
| C | 4.74984900  | -1.07389800 | 1.74539400  | H | -1.18020900 | -2.01754300 | 1.50853200  |
| C | 5.30954700  | -0.89384200 | 0.47646900  | C | -3.46595400 | -0.40497600 | 4.18184500  |
| H | 5.13526300  | -1.42725300 | -1.60256000 | H | -3.99994000 | 1.03390100  | 2.68046300  |
| H | 3.10904000  | -2.78701100 | -1.31156300 | C | -2.72320600 | -1.55096100 | 4.47860000  |
| H | 3.16472300  | -1.96853700 | 2.90625200  | H | -1.30867900 | -2.99194100 | 3.69669000  |
| H | 5.20476700  | -0.58824500 | 2.60449000  | H | -4.11094100 | 0.03918700  | 4.93409700  |
| C | 6.49578600  | 0.01197300  | 0.26656400  | H | -2.77928100 | -1.99797900 | 5.46609600  |
| H | 7.02486900  | 0.20257900  | 1.20433000  | C | -0.63970300 | 0.73112500  | -1.11703400 |
| H | 7.20715600  | -0.41888500 | -0.44488500 | H | -0.53728600 | 0.81619000  | -2.19039600 |
| H | 6.17425500  | 0.97957200  | -0.13632800 | C | -1.56989800 | -0.35901700 | -0.54964500 |
| S | 1.47009500  | -3.37881100 | 1.04887600  | H | -0.94752000 | -1.07413600 | -0.02036100 |
| O | 0.55438300  | -2.87825400 | -0.05994300 | C | -2.31486300 | -1.14133300 | -1.60215600 |
| O | 1.75879400  | -4.81387500 | 0.95018400  | C | -2.98416200 | -0.50491800 | -2.65656900 |
| O | 0.96367400  | -2.91899600 | 2.38580500  | C | -2.31924000 | -2.53972000 | -1.53864600 |
| C | -0.19277900 | 3.19627700  | -0.04901200 | C | -3.65827200 | -1.25044200 | -3.61915900 |
| C | -0.82103200 | 3.67178700  | 1.13996900  | H | -2.99725800 | 0.57896300  | -2.71034800 |
| C | -0.53703200 | 4.92039200  | 1.68745600  | C | -2.99526100 | -3.28644100 | -2.50443900 |
| C | 0.39026600  | 5.71489000  | 1.01777000  | H | -1.75899200 | -3.03991000 | -0.75531500 |
| C | 1.01476900  | 5.27035400  | -0.16093000 | C | -3.66844800 | -2.64501900 | -3.54322400 |
| C | 0.73447200  | 4.01956900  | -0.69907900 | H | -4.17862000 | -0.74405600 | -4.42638500 |
| C | -0.73261500 | 1.87069500  | -0.26875400 | H | -2.98262600 | -4.37032300 | -2.44857000 |
| C | -1.64677300 | 1.62213700  | 0.74656900  | H | -4.19237500 | -3.22700300 | -4.29529400 |
| H | -1.01984700 | 5.26234700  | 2.59730400  | C | 2.82379600  | 1.34788800  | -1.60291100 |
| H | 0.63441300  | 6.69460400  | 1.41524400  | C | 2.75302900  | 1.47360500  | -0.17165400 |
| H | 1.73669600  | 5.91169900  | -0.65549200 | C | 3.51884900  | 2.42653100  | 0.51791100  |
| H | 1.24311400  | 3.67741900  | -1.59287600 | C | 4.33530500  | 3.24995500  | -0.23498400 |
| H | -2.30622000 | 2.74770600  | 2.39905800  | C | 4.42262400  | 3.14135500  | -1.65023900 |
| N | -1.70721100 | 2.68124500  | 1.59029500  | C | 3.68286000  | 2.19897600  | -2.33538000 |
| C | -2.45847300 | 0.36835300  | 0.58636900  | C | 1.93520700  | 0.30854200  | -1.96881700 |
| C | -3.86101000 | 0.68622600  | 0.04699300  | C | 1.29167100  | -0.11049200 | -0.77251600 |
| C | -4.83075800 | -0.32471700 | 0.04940000  | H | 3.45526400  | 2.51571500  | 1.59620000  |
| C | -4.17928100 | 1.92385800  | -0.51861300 | H | 4.93438500  | 4.00285900  | 0.26792300  |
| C | -6.08401000 | -0.10689900 | -0.51310900 | H | 5.08687500  | 3.80833100  | -2.18956200 |
| H | -4.59012200 | -1.29078900 | 0.47857100  | H | 3.75313200  | 2.11070100  | -3.41506400 |
| C | -5.43977100 | 2.14528900  | -1.07831600 | H | 1.58194400  | 0.38450100  | 1.27670000  |
| H | -3.44245800 | 2.71935900  | -0.54130300 | N | 1.85565000  | 0.57194100  | 0.29435300  |
| C | -6.39423800 | 1.13082500  | -1.08061400 | H | 0.90985900  | -1.10715000 | -0.58728600 |
| H | -6.81787500 | -0.90664400 | -0.51325200 | C | 1.69230900  | -0.25934600 | -3.33029800 |
| H | -5.67042900 | 3.11341700  | -1.51246700 | H | 1.23946600  | 0.51128500  | -3.97522700 |
| H | -7.37264600 | 1.30144100  | -1.51875700 | H | 2.66671300  | -0.48429400 | -3.78283500 |
| C | -2.56137300 | -0.38424100 | 1.91980400  | C | 0.81920900  | -1.52715500 | -3.39954900 |
| C | -1.83705500 | -1.54012600 | 2.22332600  | H | 0.68555900  | -1.76801500 | -4.46185500 |

H -0.18065700 -1.32602100 -3.00104500  
O 1.40880900 -2.64324300 -2.76886500  
H 0.99526200 -2.81077500 -1.89874900  
O 0.93706400 -0.22666700 2.74690300  
H 0.97690800 -1.21412700 2.67290800  
H 0.00473400 -0.05360000 2.92820800

**INT-8A**

C -5.99985800 0.25551200 -0.13280700  
C -4.78775000 -0.31047200 0.24628000  
C -4.35764900 -1.47778300 -0.39232400  
C -5.12559400 -2.07308500 -1.38795200  
C -6.33988800 -1.49133200 -1.75356700  
C -6.79430100 -0.32294600 -1.13455100  
H -6.33895100 1.16366600 0.35867700  
H -4.19021200 0.14190000 1.03165300  
H -4.76444100 -2.97851800 -1.86176600  
H -6.94267600 -1.95301600 -2.53111100  
C -8.11710100 0.29521400 -1.51344300  
H -8.87130300 0.11887300 -0.73715200  
H -8.02988200 1.37968100 -1.63616400  
H -8.50095300 -0.12279200 -2.44793600  
S -2.78318800 -2.20383700 0.05619100  
O -1.77305400 -1.11831800 -0.26976300  
O -2.80800900 -2.44507000 1.52796100  
O -2.59666700 -3.41033000 -0.77601000  
C 2.30523800 2.64285400 -0.71095400  
C 2.78494300 2.37866300 -2.02153400  
C 3.22320900 3.37564400 -2.87864400  
C 3.19186600 4.68523800 -2.38956200  
C 2.73189900 4.96758200 -1.09753100  
C 2.27776700 3.95642500 -0.24922100  
C 1.95222300 1.34235500 -0.15753000  
C 2.28951000 0.37169600 -1.14283700  
H 3.58118900 3.15361800 -3.87843600  
H 3.52909300 5.49567500 -3.02717100  
H 2.70449700 5.99425800 -0.75086100  
H 1.88977700 4.19354900 0.73426300  
H 3.03005700 0.49363500 -3.07627000  
N 2.75377500 0.97298300 -2.22992800  
C 2.19034300 -1.03960300 -0.66429200  
C 3.56967100 -1.51622700 -0.16348600  
C 3.72818000 -2.87708900 0.12730500

C 4.63698500 -0.64543500 0.07323200  
C 4.92258700 -3.35279100 0.65725200  
H 2.90302500 -3.55752300 -0.04791900  
C 5.83837100 -1.12504900 0.60082900  
H 4.54563700 0.41420800 -0.13830800  
C 5.98386600 -2.47773300 0.89775300  
H 5.02202700 -4.40855100 0.88813500  
H 6.65775100 -0.43500800 0.77715200  
H 6.91632300 -2.84947600 1.31062000  
C 1.69855000 -1.97736200 -1.76716100  
C 0.47261700 -2.63721100 -1.72640000  
C 2.53329500 -2.17220600 -2.88077100  
C 0.06480200 -3.44808900 -2.78785800  
H -0.20266000 -2.51549400 -0.89644800  
C 2.12568200 -2.97293400 -3.94506900  
H 3.52993700 -1.73630700 -2.89074100  
C 0.88272300 -3.61061400 -3.90386200  
H -0.90392900 -3.93066600 -2.71279300  
H 2.78414800 -3.11180600 -4.79738400  
H 0.56532700 -4.23825500 -4.73089300  
C 1.38800200 0.68699800 0.90231100  
H 1.07261600 1.12943800 1.83578200  
C 1.22913300 -0.78330500 0.61651000  
H 0.19503300 -0.90162100 0.26173900  
C 1.40855400 -1.66839800 1.82414100  
C 2.45010700 -1.44108700 2.73438900  
C 0.50878800 -2.71183100 2.06624600  
C 2.60198200 -2.25286500 3.85457700  
H 3.15792700 -0.63826900 2.55075600  
C 0.66086600 -3.52504000 3.18908700  
H -0.33591800 -2.87107300 1.40843100  
C 1.70844100 -3.30173800 4.08191400  
H 3.41709100 -2.06903400 4.54781100  
H -0.05440200 -4.32123400 3.36767000  
H 1.82429400 -3.93490200 4.95637700  
C -0.88109900 3.72858800 1.47344100  
C -0.95535000 3.76736100 0.04557300  
C -0.69906700 4.93251800 -0.67683500  
C -0.34427400 6.07325400 0.03791600  
C -0.24834600 6.05521700 1.44407300  
C -0.51895300 4.89669700 2.16554600  
C -1.21350000 2.38601200 1.87818900  
C -1.45689500 1.68390400 0.71445400  
H -0.75847400 4.94479900 -1.76055500

|              |             |             |             |   |             |             |             |
|--------------|-------------|-------------|-------------|---|-------------|-------------|-------------|
| H            | -0.13845200 | 6.99455900  | -0.49854600 | C | 2.54495000  | 1.09499200  | -0.62933800 |
| H            | 0.02739500  | 6.96436900  | 1.96970200  | C | 2.77739100  | -0.16581500 | -1.18050400 |
| H            | -0.45806600 | 4.89573100  | 3.25009600  | H | 5.55074300  | 1.19278500  | -3.90848600 |
| H            | -1.23564400 | 2.12775400  | -1.31939100 | H | 6.06404900  | 3.61756100  | -3.67852200 |
| N            | -1.31183100 | 2.50666200  | -0.38001000 | H | 4.95166600  | 4.98428400  | -1.94658700 |
| H            | -1.75486000 | 0.65573800  | 0.58667600  | H | 3.25885700  | 3.99538100  | -0.43493400 |
| C            | -1.31298600 | 1.85227100  | 3.27850000  | H | 4.02683900  | -0.85896100 | -2.71620700 |
| H            | -0.40331400 | 2.11034300  | 3.84172000  | N | 3.68242100  | -0.07920000 | -2.17650100 |
| H            | -2.13974000 | 2.34523300  | 3.80826100  | C | 2.18085700  | -1.31323300 | -0.42096800 |
| C            | -1.52571800 | 0.33928300  | 3.37235800  | C | 3.24627400  | -1.97662300 | 0.46973600  |
| H            | -1.43037200 | 0.03850400  | 4.42845600  | C | 2.94872900  | -3.21013000 | 1.06265100  |
| H            | -0.73195800 | -0.18540400 | 2.82325500  | C | 4.46123400  | -1.35658500 | 0.77406800  |
| O            | -2.80127800 | 0.00425600  | 2.86433000  | C | 3.84021900  | -3.80176800 | 1.95138900  |
| H            | -2.78434300 | -0.91830100 | 2.53417900  | H | 2.00515900  | -3.69438600 | 0.83897500  |
| O            | -0.56611700 | 0.38507900  | -2.14601600 | C | 5.35980800  | -1.95470400 | 1.66049400  |
| H            | -0.57064100 | -0.04880700 | -3.00752600 | H | 4.71355600  | -0.39642800 | 0.33741000  |
| H            | -1.10479200 | -0.21688800 | -1.57966900 | C | 5.05116600  | -3.17605000 | 2.25445100  |
| <b>TS-6A</b> |             |             |             | H | 3.58592300  | -4.75114100 | 2.41183500  |
| C            | -6.20583400 | 0.99677300  | -0.79825400 | H | 6.29996500  | -1.45991700 | 1.88449900  |
| C            | -5.05888300 | 0.38740700  | -0.30228100 | H | 5.74740600  | -3.63878100 | 2.94685100  |
| C            | -4.72976000 | -0.89686000 | -0.74597200 | C | 1.57411800  | -2.35469700 | -1.36857300 |
| C            | -5.53128900 | -1.56265800 | -1.66760900 | C | 0.20720300  | -2.62156400 | -1.45973100 |
| C            | -6.67807900 | -0.93465500 | -2.15464100 | C | 2.45419000  | -3.08109000 | -2.19033600 |
| C            | -7.03230600 | 0.34904000  | -1.72922800 | C | -0.27781700 | -3.57061000 | -2.36569300 |
| H            | -6.46849400 | 1.99458300  | -0.45627500 | H | -0.51787200 | -2.11684100 | -0.83827900 |
| H            | -4.43694800 | 0.89335000  | 0.42882000  | C | 1.97326000  | -4.01514300 | -3.10269600 |
| H            | -5.24736400 | -2.55691600 | -1.99229200 | H | 3.52783400  | -2.95297600 | -2.07387800 |
| H            | -7.30605200 | -1.45061900 | -2.87603200 | C | 0.59996400  | -4.26003500 | -3.19702300 |
| C            | -8.28242400 | 1.02173600  | -2.23945200 | H | -1.34763100 | -3.75143900 | -2.38230500 |
| H            | -9.05214100 | 1.06789200  | -1.45980300 | H | 2.67076600  | -4.56495600 | -3.72761400 |
| H            | -8.08121600 | 2.05127600  | -2.55362500 | H | 0.22539300  | -4.99597800 | -3.90165000 |
| H            | -8.70626400 | 0.48402500  | -3.09174800 | C | 1.59100300  | 0.97683200  | 0.40994400  |
| S            | -3.24675800 | -1.69137300 | -0.13220800 | H | 1.58781900  | 1.59776500  | 1.29774100  |
| O            | -2.12773400 | -0.74355500 | -0.51857700 | C | 1.13908700  | -0.48595300 | 0.49469900  |
| O            | -3.36178000 | -1.75081200 | 1.35683400  | H | 0.18117500  | -0.55197200 | -0.01926200 |
| O            | -3.13754500 | -3.00191600 | -0.80502000 | C | 0.93356000  | -0.97929900 | 1.90684200  |
| C            | 3.42900700  | 2.02643000  | -1.30841400 | C | 1.84835800  | -0.68275100 | 2.92558000  |
| C            | 4.11100200  | 1.25386900  | -2.29227400 | C | -0.19771500 | -1.74034900 | 2.21259200  |
| C            | 5.05070800  | 1.80033700  | -3.16123700 | C | 1.64013700  | -1.14864600 | 4.22075200  |
| C            | 5.33340200  | 3.15684800  | -3.02202200 | H | 2.74000000  | -0.10520900 | 2.70169500  |
| C            | 4.69667300  | 3.93373200  | -2.03980900 | C | -0.41041800 | -2.20458000 | 3.51056200  |
| C            | 3.74738700  | 3.38397500  | -1.18334400 | H | -0.94363300 | -1.94215800 | 1.45624900  |
|              |             |             |             | C | 0.50929000  | -1.91356300 | 4.51718200  |
|              |             |             |             | H | 2.36099300  | -0.91612300 | 4.99867500  |



|              |             |             |             |   |             |             |             |
|--------------|-------------|-------------|-------------|---|-------------|-------------|-------------|
| C            | -2.04296400 | 0.12911700  | -0.29120300 | C | -4.65691200 | -0.01060600 | 0.59117300  |
| H            | -1.45757700 | -0.60582100 | 0.28606800  | C | -4.96502700 | 1.20645900  | -0.01951100 |
| C            | -3.48706300 | -0.20370200 | -0.07851500 | C | -6.25178700 | 1.41817000  | -0.50362900 |
| C            | -4.43669200 | -0.06334800 | -1.09229100 | C | -7.24287700 | 0.43337500  | -0.38408100 |
| C            | -3.89343800 | -0.66047400 | 1.18133300  | H | -7.65988800 | -1.55734400 | 0.31939300  |
| C            | -5.77356300 | -0.37924100 | -0.85613600 | H | -5.35024800 | -1.94838300 | 1.18016900  |
| H            | -4.13191700 | 0.30473800  | -2.06715800 | H | -4.20102100 | 1.96748400  | -0.13423100 |
| C            | -5.23110500 | -0.95763700 | 1.42516700  | H | -6.49208200 | 2.36141600  | -0.98685900 |
| H            | -3.15273900 | -0.78068200 | 1.96578600  | C | -8.64232900 | 0.68764600  | -0.88609100 |
| C            | -6.17458300 | -0.82063300 | 0.40413300  | H | -9.22373300 | 1.26190700  | -0.15453000 |
| H            | -6.50188900 | -0.27315000 | -1.65394900 | H | -8.63492800 | 1.26370500  | -1.81645100 |
| H            | -5.53645500 | -1.30838200 | 2.40611400  | H | -9.17817100 | -0.24793100 | -1.06839200 |
| H            | -7.21664300 | -1.06145700 | 0.59036300  | S | -3.00306700 | -0.28681400 | 1.21971300  |
| C            | -2.14266800 | -3.38780300 | -0.22497800 | O | -2.10559300 | 0.29259400  | 0.15828900  |
| C            | -1.54332400 | -3.09554200 | -1.48754900 | O | -2.87663800 | 0.46788400  | 2.50154300  |
| C            | -2.27039700 | -3.14060000 | -2.68216700 | O | -2.85344700 | -1.75895900 | 1.36094400  |
| C            | -3.62331700 | -3.45828600 | -2.60512700 | C | -0.81756300 | -1.03332100 | -2.37449200 |
| C            | -4.23623200 | -3.73783000 | -1.36783800 | C | -1.54291500 | -1.98889700 | -1.60788700 |
| C            | -3.50757900 | -3.71477700 | -0.18566500 | C | -2.81300200 | -2.42402600 | -1.97288200 |
| C            | -1.11747400 | -3.23249700 | 0.77951400  | C | -3.34456800 | -1.92836900 | -3.16028100 |
| C            | 0.02485300  | -2.85449700 | 0.10367800  | C | -2.61992500 | -1.03140200 | -3.96641300 |
| H            | -1.79255500 | -2.94176000 | -3.63796000 | C | -1.35954400 | -0.57681900 | -3.58235000 |
| H            | -4.21453900 | -3.49686900 | -3.51498900 | C | 0.35875800  | -0.73991600 | -1.59094500 |
| H            | -5.29540500 | -3.97272800 | -1.34107200 | C | 0.33449300  | -1.57440100 | -0.48365500 |
| H            | -3.99229500 | -3.93062000 | 0.76117800  | H | -3.37191100 | -3.10037400 | -1.33685500 |
| H            | 0.51372700  | -2.51848200 | -1.90536300 | H | -4.33527500 | -2.24266200 | -3.47140800 |
| N            | -0.22934300 | -2.75218600 | -1.24595800 | H | -3.05220500 | -0.68761200 | -4.90096200 |
| H            | 1.00424300  | -2.64774900 | 0.49655200  | H | -0.81126400 | 0.12385600  | -4.20550300 |
| C            | -1.23414700 | -3.53433800 | 2.24683200  | H | -1.23125200 | -2.67761300 | 0.36681300  |
| H            | -2.27147500 | -3.38197600 | 2.57424700  | N | -0.78303500 | -2.34019100 | -0.48318900 |
| H            | -1.01301800 | -4.59590100 | 2.42530200  | C | 1.59850200  | -1.55819400 | 0.33531500  |
| C            | -0.32513800 | -2.69499000 | 3.14887100  | C | 2.56713900  | -2.64297200 | -0.15787900 |
| H            | -0.53530200 | -2.95659400 | 4.19889600  | C | 3.86432000  | -2.72063500 | 0.37501900  |
| H            | -0.58639300 | -1.63981400 | 3.02484300  | C | 2.21492100  | -3.54932000 | -1.16435100 |
| O            | 1.03923400  | -2.93592200 | 2.84793700  | C | 4.77284100  | -3.67222400 | -0.08029300 |
| H            | 1.54332800  | -2.10258900 | 2.84462100  | H | 4.17188300  | -2.02321900 | 1.14366600  |
| O            | 2.30758600  | -1.90256400 | -2.06333500 | C | 3.12584800  | -4.50196500 | -1.62445100 |
| H            | 2.61511100  | -1.30106400 | -2.75292900 | H | 1.22273600  | -3.52303900 | -1.59762500 |
| H            | 2.25929700  | -1.33616800 | -1.26129700 | C | 4.40850600  | -4.56808500 | -1.08563500 |
|              |             |             |             | H | 5.77008900  | -3.70449100 | 0.34739900  |
|              |             |             |             | H | 2.82468900  | -5.19352000 | -2.40539800 |
|              |             |             |             | H | 5.11693600  | -5.30884300 | -1.44347900 |
| <b>TS-6B</b> |             |             |             | C | 1.28639900  | -1.64431200 | 1.83537800  |
| C            | -6.90667500 | -0.77934100 | 0.22779400  | C | 0.25985400  | -0.82892200 | 2.33236100  |
| C            | -5.62109600 | -1.00666900 | 0.71689500  |   |             |             |             |

C 1.89090200 -2.55200000 2.71225800  
 C -0.15004700 -0.90531600 3.66023600  
 H -0.26265200 -0.15980500 1.66115000  
 C 1.50192700 -2.61160100 4.05205400  
 H 2.65122000 -3.23447900 2.35778100  
 C 0.48365200 -1.79078700 4.53199300  
 H -0.99064300 -0.30067300 3.98094700  
 H 1.98847800 -3.32174200 4.71415600  
 H 0.16932200 -1.85696800 5.56905100  
 C 1.41205000 0.21072300 -1.44725500  
 H 2.00501000 0.55632200 -2.28653000  
 C 2.12403700 -0.08431800 -0.12385300  
 H 1.67889900 0.57867500 0.62055700  
 C 3.59952200 0.20133600 -0.13388500  
 C 4.41863300 -0.16618000 -1.20828500  
 C 4.17410600 0.86384900 0.95577100  
 C 5.78030000 0.12396100 -1.19423000  
 H 3.99217300 -0.70600600 -2.04835800  
 C 5.53873900 1.14842500 0.97762300  
 H 3.54228700 1.15800500 1.78881700  
 C 6.34516300 0.78059600 -0.09951200  
 H 6.40278300 -0.17039100 -2.03355400  
 H 5.96935600 1.66385900 1.83056600  
 H 7.40711100 1.00584300 -0.08768400  
 C 1.97286000 3.55441000 -0.13929300  
 C 1.74679400 2.89664100 -1.36310000  
 C 2.54428700 3.09305100 -2.47706700  
 C 3.61549200 3.98571800 -2.34932000  
 C 3.86443300 4.64068300 -1.13877800  
 C 3.04565400 4.43591900 -0.02464800  
 C 0.93499300 3.10970200 0.79628300  
 C 0.17334900 2.20077600 0.14743200  
 H 2.34972400 2.58624700 -3.41683400  
 H 4.26079600 4.16806800 -3.20204800  
 H 4.70644000 5.32143100 -1.06597000  
 H 3.24085400 4.95321000 0.90905500  
 H -0.14756000 1.97931200 -1.83735500  
 N 0.66543200 1.96597100 -1.18209900  
 H -0.71876800 1.68403800 0.46161000  
 C 0.73222500 3.61657600 2.19105000  
 H 1.69280200 3.61088100 2.72481700  
 H 0.41837200 4.66815000 2.13962600  
 C -0.29955400 2.82809500 3.00283500  
 H -0.31089600 3.23119000 4.02901000

H 0.02865900 1.78347900 3.07326000  
 O -1.56712900 2.94174100 2.39382800  
 H -2.06233800 2.10456000 2.50944200  
 O -1.97003300 1.94278400 -2.00525400  
 H -2.29434000 1.39133600 -2.73021200  
 H -2.16770600 1.38926000 -1.21471800

**INT-9A**

C -5.50306900 -0.85902600 -2.12228400  
 C -4.17498500 -1.26137900 -2.01621800  
 C -3.59952400 -1.39364400 -0.75167800  
 C -4.34087700 -1.13004700 0.39590400  
 C -5.66902400 -0.72548100 0.27564600  
 C -6.27031200 -0.58487300 -0.98007900  
 H -5.95231600 -0.74913100 -3.10568500  
 H -3.57716300 -1.44810800 -2.90152300  
 H -3.86131300 -1.21617700 1.36375900  
 H -6.24591300 -0.50579700 1.16998700  
 C -7.71460800 -0.16907600 -1.10614700  
 H -7.87407700 0.46206900 -1.98554200  
 H -8.36729100 -1.04391500 -1.21314000  
 H -8.05034400 0.38295100 -0.22382000  
 S -1.87597100 -1.86704700 -0.61821200  
 O -1.78996300 -3.32766600 -0.87915900  
 O -1.19194300 -1.05176800 -1.68148400  
 O -1.46048500 -1.47152800 0.76236700  
 C 0.88794700 -1.09054100 2.86593200  
 C -0.18621800 -0.58163900 3.63978100  
 C -0.62190700 -1.18169000 4.80930600  
 C 0.05160200 -2.33906100 5.21219100  
 C 1.11695600 -2.85735900 4.46647500  
 C 1.54665900 -2.24041600 3.29011500  
 C 0.98222600 -0.21450600 1.70603100  
 C -0.00579100 0.79879900 1.88243700  
 H -1.45162000 -0.78220300 5.38259800  
 H -0.26339200 -2.84548900 6.11825100  
 H 1.61146800 -3.76189700 4.80284000  
 H 2.36782900 -2.64171000 2.71147300  
 H -1.50045700 1.11622100 3.27490600  
 N -0.68489800 0.58582500 2.99530800  
 C -0.03696200 1.81657000 0.79305100  
 C 0.83181900 3.03433700 1.16405100  
 C 0.69757600 4.20596500 0.40904000

|   |             |             |             |              |             |             |             |
|---|-------------|-------------|-------------|--------------|-------------|-------------|-------------|
| C | 1.81194200  | 2.98149600  | 2.15926600  | H            | 6.10963100  | -2.31877300 | 1.56592900  |
| C | 1.53416400  | 5.29428000  | 0.63589000  | H            | 6.66092900  | -0.87921700 | -0.37053800 |
| H | -0.05685700 | 4.25690000  | -0.36648300 | H            | 5.09962100  | -0.67216000 | -2.28462900 |
| C | 2.64645300  | 4.07662700  | 2.39101500  | H            | 1.42992100  | -3.73130800 | 0.25195600  |
| H | 1.94463100  | 2.08687600  | 2.75704400  | N            | 2.04099300  | -3.29686100 | -0.45140100 |
| C | 2.51371000  | 5.23431600  | 1.62848800  | H            | 0.57303900  | -3.14714500 | -1.99193900 |
| H | 1.42256300  | 6.18922600  | 0.03203100  | C            | 2.38714000  | -1.41109500 | -3.65259900 |
| H | 3.40044700  | 4.01788700  | 3.16972400  | H            | 3.11652300  | -0.59283700 | -3.71922800 |
| H | 3.16574600  | 6.08372800  | 1.80556800  | H            | 2.66528400  | -2.13585400 | -4.42999900 |
| C | -1.48441900 | 2.22395300  | 0.50978000  | C            | 1.00948400  | -0.83764900 | -4.00753200 |
| C | -2.23056000 | 1.73097200  | -0.56174400 | H            | 1.08246700  | -0.34917500 | -4.99016300 |
| C | -2.11504100 | 3.06463500  | 1.44381600  | H            | 0.74755400  | -0.06207900 | -3.28091600 |
| C | -3.57992000 | 2.06708800  | -0.69367900 | O            | -0.00261300 | -1.82692300 | -4.07156300 |
| H | -1.79496800 | 1.04424400  | -1.27530800 | H            | -0.54229400 | -1.71658000 | -3.26830600 |
| C | -3.46258900 | 3.39209700  | 1.31386400  | O            | -0.09065400 | -4.04916600 | 1.24822700  |
| H | -1.53475000 | 3.48963600  | 2.25829700  | H            | -0.37884200 | -3.15654800 | 1.50416900  |
| C | -4.20160800 | 2.88994700  | 0.24089500  | H            | -0.69844100 | -4.20346800 | 0.49969900  |
| H | -4.14790700 | 1.64881000  | -1.51710600 |              |             |             |             |
| H | -3.93094100 | 4.04409100  | 2.04506600  |              |             |             |             |
| H | -5.25366400 | 3.13604300  | 0.13782200  |              |             |             |             |
| C | 1.46984000  | -0.10081000 | 0.43862500  | <b>TS-7A</b> |             |             |             |
| H | 2.20488500  | -0.73916800 | -0.03394500 | C            | -6.33020400 | -2.23466300 | -0.60517100 |
| C | 0.75603500  | 0.96856000  | -0.32783700 | C            | -4.96221100 | -2.27692800 | -0.86036900 |
| H | 0.00369100  | 0.37954800  | -0.88131800 | C            | -4.13503200 | -1.30579500 | -0.29852900 |
| C | 1.58891000  | 1.74704400  | -1.30832200 | C            | -4.66002500 | -0.30037200 | 0.51223200  |
| C | 2.97514300  | 1.84956600  | -1.15960200 | C            | -6.03100200 | -0.27063900 | 0.75530000  |
| C | 0.97149000  | 2.38685600  | -2.38964800 | C            | -6.88520600 | -1.23396600 | 0.20368300  |
| C | 3.73381500  | 2.56970700  | -2.08058600 | H            | -6.97906300 | -2.99067700 | -1.03900100 |
| H | 3.46894900  | 1.35796600  | -0.32744000 | H            | -4.52924700 | -3.05598900 | -1.47756300 |
| C | 1.72637900  | 3.11722700  | -3.30426900 | H            | -3.99629900 | 0.43912300  | 0.94386200  |
| H | -0.10365400 | 2.30593500  | -2.51508900 | H            | -6.44527800 | 0.51132900  | 1.38616300  |
| C | 3.11115900  | 3.20812500  | -3.15310100 | C            | -8.36403600 | -1.21579600 | 0.49973900  |
| H | 4.81042800  | 2.63242200  | -1.95727300 | H            | -8.94538900 | -1.59280900 | -0.34667700 |
| H | 1.23578400  | 3.60443200  | -4.14108900 | H            | -8.59983500 | -1.84865900 | 1.36409100  |
| H | 3.70144000  | 3.77055700  | -3.86982800 | H            | -8.71295600 | -0.20530400 | 0.73040600  |
| C | 3.61680700  | -1.98333900 | -1.40405400 | S            | -2.39117900 | -1.29484200 | -0.68883300 |
| C | 3.30258300  | -2.78412100 | -0.25925000 | O            | -1.98677900 | -2.72957000 | -0.86444800 |
| C | 4.19740900  | -2.92441200 | 0.80937500  | O            | -2.21796500 | -0.49197900 | -1.93058100 |
| C | 5.39830900  | -2.22586600 | 0.75086400  | O            | -1.71606000 | -0.66872800 | 0.49912800  |
| C | 5.71377600  | -1.41027900 | -0.35594900 | C            | 1.71157000  | -0.33838300 | 2.80323800  |
| C | 4.84207100  | -1.29319600 | -1.43167900 | C            | 0.95816500  | 0.47436000  | 3.70307500  |
| C | 2.48551300  | -2.04960200 | -2.29561400 | C            | 0.95757600  | 0.26791100  | 5.07866100  |
| C | 1.55676900  | -2.85258900 | -1.66784500 | C            | 1.75141000  | -0.76590800 | 5.57094200  |
| H | 3.97387500  | -3.58321200 | 1.64343000  | C            | 2.52385000  | -1.56145000 | 4.70876000  |
|   |             |             |             | C            | 2.50907600  | -1.36128300 | 3.33172600  |



|   |             |             |             |               |             |             |             |
|---|-------------|-------------|-------------|---------------|-------------|-------------|-------------|
| C | 1.42191300  | 0.17294700  | 1.48084500  | H             | 0.24877700  | 2.03141500  | -5.17727100 |
| C | 0.57871300  | 1.26725400  | 1.64494900  | H             | 2.62852800  | 2.69632500  | -5.46053800 |
| H | 0.36812700  | 0.89149000  | 5.74311900  | C             | 3.06138200  | -3.06455500 | -1.01648000 |
| H | 1.77622600  | -0.95420800 | 6.63921200  | C             | 2.70787300  | -3.37631900 | 0.34214900  |
| H | 3.14328700  | -2.34875300 | 5.12619100  | C             | 3.50440200  | -4.22555600 | 1.13038700  |
| H | 3.11376300  | -1.97749000 | 2.67834800  | C             | 4.64455100  | -4.74941900 | 0.54746500  |
| H | -0.31187200 | 2.17665600  | 3.31280800  | C             | 5.01339100  | -4.45114300 | -0.79150900 |
| N | 0.29548000  | 1.45652600  | 2.95175300  | C             | 4.23730400  | -3.62060400 | -1.57234500 |
| C | 0.41065000  | 2.11207500  | 0.42003500  | C             | 2.03875500  | -2.23921500 | -1.54084700 |
| C | 1.46795200  | 3.23234700  | 0.38407700  | C             | 1.15526500  | -1.96459800 | -0.45901700 |
| C | 1.31960600  | 4.26264500  | -0.55418100 | H             | 3.22386700  | -4.46716900 | 2.14994000  |
| C | 2.60916300  | 3.22033600  | 1.19183300  | H             | 5.27738200  | -5.41344600 | 1.12838700  |
| C | 2.29216400  | 5.24825900  | -0.68969000 | H             | 5.91843400  | -4.88990500 | -1.19808100 |
| H | 0.44196700  | 4.27792900  | -1.19014100 | H             | 4.51517500  | -3.39718100 | -2.59726900 |
| C | 3.58396900  | 4.21210400  | 1.05911900  | H             | 0.87803600  | -2.88621500 | 1.40258100  |
| H | 2.75263200  | 2.43511500  | 1.92518300  | N             | 1.55574200  | -2.72505700 | 0.64012700  |
| C | 3.43133800  | 5.22693300  | 0.11698200  | H             | 0.10985600  | -1.72684400 | -0.53079000 |
| H | 2.16244800  | 6.03034500  | -1.43125200 | C             | 1.85810500  | -1.81501100 | -2.96143600 |
| H | 4.46130200  | 4.18774000  | 1.69845200  | H             | 2.23090300  | -0.79629600 | -3.12588500 |
| H | 4.19025500  | 5.99623100  | 0.01322500  | H             | 2.46079400  | -2.47794200 | -3.59126800 |
| C | -0.99147200 | 2.71931700  | 0.35262800  | C             | 0.38280700  | -1.89341700 | -3.40318700 |
| C | -1.99615300 | 2.27964100  | -0.50741400 | H             | 0.34188000  | -1.69646100 | -4.48341900 |
| C | -1.28952700 | 3.75012800  | 1.26115700  | H             | -0.19873500 | -1.10645400 | -2.91758200 |
| C | -3.27240100 | 2.84571200  | -0.45308400 | O             | -0.16540500 | -3.16831600 | -3.13108800 |
| H | -1.82732000 | 1.47164700  | -1.20276800 | H             | -0.83928800 | -3.06557900 | -2.43505600 |
| C | -2.56463500 | 4.30620800  | 1.32437300  | O             | -0.84985500 | -2.91168800 | 1.90997400  |
| H | -0.50311500 | 4.14280300  | 1.90055100  | H             | -1.14100700 | -1.99411600 | 1.73453800  |
| C | -3.56610100 | 3.85248300  | 0.46347200  | H             | -1.24308500 | -3.35640000 | 1.13941100  |
| H | -4.03761800 | 2.47499500  | -1.12757100 |               |             |             |             |
| H | -2.77156600 | 5.10020700  | 2.03575300  |               |             |             |             |
| H | -4.56087200 | 4.28551200  | 0.50470600  |               |             |             |             |
| C | 1.73412500  | 0.02515500  | 0.09636600  | <b>INT-9B</b> |             |             |             |
| H | 2.74536700  | -0.15938600 | -0.24032200 | C             | -5.58611000 | -3.19069200 | -1.50894000 |
| C | 0.81103600  | 0.98598700  | -0.67415600 | C             | -4.28933300 | -2.98863900 | -1.04118400 |
| H | -0.11893800 | 0.44417500  | -0.84613900 | C             | -3.83710900 | -1.68970200 | -0.82054000 |
| C | 1.33346600  | 1.48333300  | -1.99477000 | C             | -4.67139400 | -0.59801200 | -1.06136800 |
| C | 2.67101500  | 1.86486900  | -2.16342200 | C             | -5.96440000 | -0.81454200 | -1.52829500 |
| C | 0.46777600  | 1.55486000  | -3.09274800 | C             | -6.44247600 | -2.11150600 | -1.75880900 |
| C | 3.13577900  | 2.29789200  | -3.40291100 | H             | -5.94089900 | -4.20339700 | -1.68024500 |
| H | 3.34917600  | 1.84086800  | -1.31648300 | H             | -3.62767100 | -3.82186700 | -0.83473400 |
| C | 0.93090500  | 1.99168400  | -4.33372700 | H             | -4.31156200 | 0.40755700  | -0.87899600 |
| H | -0.56297800 | 1.23635300  | -2.98098900 | H             | -6.61626600 | 0.03513200  | -1.71373000 |
| C | 2.26625100  | 2.36166600  | -4.49328700 | C             | -7.85642200 | -2.33985800 | -2.23136300 |
| H | 4.17531500  | 2.58994900  | -3.51605700 | H             | -8.54558900 | -2.42606600 | -1.38235600 |
|   |             |             |             | H             | -8.20874100 | -1.51190200 | -2.85333600 |

|   |             |             |             |              |             |             |             |
|---|-------------|-------------|-------------|--------------|-------------|-------------|-------------|
| H | -7.93894400 | -3.26244300 | -2.81273500 | C            | 0.93594400  | 0.90818100  | -0.46517200 |
| S | -2.14799300 | -1.41935100 | -0.29067800 | H            | 0.17465600  | 0.27041500  | -0.93958200 |
| O | -1.71348800 | -2.67953600 | 0.37288000  | C            | 1.95981600  | 1.29017600  | -1.49612800 |
| O | -1.35655600 | -1.11147100 | -1.52140800 | C            | 3.27311500  | 1.60439400  | -1.12853400 |
| O | -2.20929600 | -0.24208100 | 0.63782100  | C            | 1.60306500  | 1.34246900  | -2.84761900 |
| C | 0.37959400  | -0.22735100 | 3.11494200  | C            | 4.21126000  | 1.96907500  | -2.09049400 |
| C | -0.75373600 | 0.52213700  | 3.51745500  | H            | 3.55417000  | 1.57973400  | -0.07995000 |
| C | -1.44434000 | 0.26194800  | 4.68937500  | C            | 2.53869300  | 1.71435500  | -3.81284200 |
| C | -0.96367800 | -0.78146700 | 5.48705200  | H            | 0.59069700  | 1.08512500  | -3.14205300 |
| C | 0.16287100  | -1.52472600 | 5.11310700  | C            | 3.84496800  | 2.02880400  | -3.43599100 |
| C | 0.84537300  | -1.26066700 | 3.92283400  | H            | 5.22620800  | 2.20985900  | -1.79031300 |
| C | 0.74554100  | 0.31108500  | 1.81195600  | H            | 2.24936900  | 1.75055700  | -4.85860100 |
| C | -0.16338400 | 1.39405000  | 1.55428700  | H            | 4.57494200  | 2.31425600  | -4.18705800 |
| H | -2.32277900 | 0.83384700  | 4.96670500  | C            | 3.24454800  | -2.85381200 | -0.11951600 |
| H | -1.47796300 | -1.01982900 | 6.41225600  | C            | 2.00989700  | -3.24248400 | 0.48688800  |
| H | 0.50711700  | -2.32792100 | 5.75629400  | C            | 1.95224800  | -3.80204600 | 1.76830700  |
| H | 1.70166000  | -1.85390100 | 3.62302500  | C            | 3.15136800  | -3.96839700 | 2.45244300  |
| H | -1.97679600 | 1.94256000  | 2.41532700  | C            | 4.38254300  | -3.58739000 | 1.87567100  |
| N | -1.02620000 | 1.52440600  | 2.54047300  | C            | 4.44127900  | -3.03593600 | 0.60254000  |
| C | 0.12734300  | 2.10353700  | 0.26791200  | C            | 2.91742400  | -2.28826700 | -1.40924000 |
| C | 1.11665800  | 3.26030000  | 0.52191600  | C            | 1.54445000  | -2.36204400 | -1.51995800 |
| C | 1.38874600  | 4.14136900  | -0.53369300 | H            | 1.00077200  | -4.08674300 | 2.20592400  |
| C | 1.79800100  | 3.42944000  | 1.73046200  | H            | 3.14193800  | -4.40659900 | 3.44622400  |
| C | 2.32840000  | 5.15601800  | -0.38830400 | H            | 5.29948500  | -3.73565500 | 2.43789300  |
| H | 0.87035000  | 4.01754200  | -1.47713500 | H            | 5.39225100  | -2.76424100 | 0.15566900  |
| C | 2.74006700  | 4.45065400  | 1.87727000  | H            | -0.00192000 | -2.97852400 | -0.18176700 |
| H | 1.60623300  | 2.77167000  | 2.57018800  | N            | 1.00033200  | -2.93491600 | -0.39184500 |
| C | 3.01135300  | 5.31413300  | 0.81922900  | H            | 0.88944900  | -2.00985100 | -2.30233200 |
| H | 2.53180900  | 5.82000400  | -1.22244000 | C            | 3.87491400  | -1.74110200 | -2.42574400 |
| H | 3.25668700  | 4.56724300  | 2.82484600  | H            | 3.33701100  | -1.09572100 | -3.12906000 |
| H | 3.74484200  | 6.10602700  | 0.93357700  | H            | 4.62470300  | -1.11060700 | -1.93367100 |
| C | -1.13497200 | 2.63354500  | -0.41376200 | C            | 4.60588500  | -2.83540400 | -3.21611200 |
| C | -1.77211600 | 1.98242600  | -1.47202500 | H            | 5.29563700  | -2.37889000 | -3.93413900 |
| C | -1.70889400 | 3.80891800  | 0.09617800  | H            | 3.86942500  | -3.42273900 | -3.78712200 |
| C | -2.95442600 | 2.49736300  | -2.00885700 | O            | 5.40197800  | -3.67639900 | -2.39217200 |
| H | -1.39981500 | 1.04068400  | -1.85095500 | H            | 4.80395800  | -4.10143500 | -1.76137700 |
| C | -2.89712200 | 4.31512200  | -0.42903700 | O            | -3.58226700 | 1.79304200  | 1.79623100  |
| H | -1.21851100 | 4.33386200  | 0.90937000  | H            | -3.33930200 | 0.94996900  | 1.34926200  |
| C | -3.52624700 | 3.65799900  | -1.48993300 | H            | -3.66153000 | 2.43162700  | 1.07296000  |
| H | -3.43412000 | 1.97032400  | -2.82746100 |              |             |             |             |
| H | -3.32423900 | 5.22341500  | -0.01541100 |              |             |             |             |
| H | -4.44801100 | 4.05098100  | -1.90740500 |              |             |             |             |
| C | 1.43232600  | 0.05416800  | 0.66929500  |              |             |             |             |
| H | 2.16808500  | -0.72505900 | 0.51411700  |              |             |             |             |
|   |             |             |             | <b>TS-7B</b> |             |             |             |
|   |             |             |             | C            | 6.31748300  | 0.26777000  | -1.20034000 |
|   |             |             |             | C            | 5.05060100  | 0.36750300  | -0.62809300 |

|   |             |             |             |   |             |             |             |
|---|-------------|-------------|-------------|---|-------------|-------------|-------------|
| C | 4.18408100  | -0.72045900 | -0.69220400 | C | -1.23546300 | -4.16344600 | 0.17670100  |
| C | 4.57515100  | -1.90368600 | -1.31936000 | C | 0.61673800  | -4.02696300 | -1.88282900 |
| C | 5.84226500  | -1.98923100 | -1.88779900 | H | 0.31862200  | -1.91748400 | -1.83785100 |
| C | 6.73253700  | -0.90752200 | -1.83731100 | C | -0.61346100 | -5.32702000 | -0.27578500 |
| H | 6.99694600  | 1.11438800  | -1.14874300 | H | -1.95801600 | -4.22737200 | 0.98245500  |
| H | 4.73108700  | 1.27094900  | -0.12165200 | C | 0.31707200  | -5.26306900 | -1.31562800 |
| H | 3.89115300  | -2.74492200 | -1.34314900 | H | 1.35075800  | -3.95544900 | -2.67958300 |
| H | 6.15042700  | -2.91044000 | -2.37541400 | H | -0.86164200 | -6.28049700 | 0.18097700  |
| C | 8.11671400  | -1.02244800 | -2.42572600 | H | 0.80232000  | -6.16594600 | -1.67331100 |
| H | 8.80942000  | -1.48973500 | -1.71506400 | C | -1.40695200 | 0.83646300  | 0.29448100  |
| H | 8.11643800  | -1.63830800 | -3.33006800 | H | -2.20083300 | 1.56770700  | 0.38100600  |
| H | 8.52468000  | -0.04080900 | -2.68222100 | C | -1.58564200 | -0.33764700 | -0.69656000 |
| S | 2.52458200  | -0.59179300 | -0.03214400 | H | -0.64847700 | -0.40565000 | -1.24422300 |
| O | 2.58039000  | 0.48790600  | 1.00415000  | C | -2.70547100 | -0.18594100 | -1.68842200 |
| O | 1.65488700  | -0.22051400 | -1.19286400 | C | -3.96873800 | 0.29466600  | -1.31620800 |
| O | 2.21646200  | -1.93895400 | 0.51227000  | C | -2.48329100 | -0.51636800 | -3.03035800 |
| C | -0.23439400 | 0.61253100  | 2.74623400  | C | -4.97675600 | 0.45328900  | -2.26330400 |
| C | 0.15973000  | -0.63329600 | 3.32077900  | H | -4.16931700 | 0.52767400  | -0.27563400 |
| C | 0.82268500  | -0.71174800 | 4.54148700  | C | -3.49296100 | -0.36405800 | -3.98128900 |
| C | 1.07250400  | 0.48214900  | 5.21467300  | H | -1.50976800 | -0.89384900 | -3.32859700 |
| C | 0.66480900  | 1.71744700  | 4.68224300  | C | -4.74169900 | 0.12627800  | -3.60031900 |
| C | 0.01829500  | 1.79444000  | 3.45233100  | H | -5.94913400 | 0.82605500  | -1.95652800 |
| C | -0.81120300 | 0.27357100  | 1.46822600  | H | -3.30123500 | -0.62306300 | -5.01806300 |
| C | -0.78112900 | -1.11618500 | 1.36859600  | H | -5.52768300 | 0.25111200  | -4.33875600 |
| H | 1.13249900  | -1.66905400 | 4.94679400  | C | -0.44349700 | 4.27940800  | -0.12341100 |
| H | 1.58842800  | 0.45636500  | 6.16922300  | C | 0.63327600  | 3.76326200  | 0.68542600  |
| H | 0.86177200  | 2.62805500  | 5.23966400  | C | 1.27580100  | 4.56782300  | 1.64860900  |
| H | -0.28146300 | 2.75484600  | 3.04931700  | C | 0.84163100  | 5.87150600  | 1.77608700  |
| H | 0.15440600  | -2.63126600 | 2.50606200  | C | -0.21559700 | 6.40313500  | 0.98159900  |
| N | -0.23906400 | -1.67211700 | 2.47095100  | C | -0.86172100 | 5.62680400  | 0.04688200  |
| C | -1.58693700 | -1.66426800 | 0.22301200  | C | -0.86365200 | 3.23266400  | -0.96654800 |
| C | -3.03325600 | -1.95323000 | 0.66404800  | C | -0.10023400 | 2.07311500  | -0.60430400 |
| C | -3.89224000 | -2.62214500 | -0.22013600 | H | 2.07167300  | 4.16425700  | 2.26421000  |
| C | -3.55174300 | -1.49779400 | 1.88008600  | H | 1.31772400  | 6.51737700  | 2.50753800  |
| C | -5.23149400 | -2.82369200 | 0.09835300  | H | -0.51222400 | 7.43643800  | 1.12689500  |
| H | -3.50637300 | -2.97557100 | -1.16944200 | H | -1.65687700 | 6.02871100  | -0.57114200 |
| C | -4.89640300 | -1.69926400 | 2.20094300  | H | 1.54933400  | 1.80975800  | 0.72414300  |
| H | -2.91203100 | -0.98176200 | 2.58591900  | N | 0.84101300  | 2.47513700  | 0.35428100  |
| C | -5.74172000 | -2.35966800 | 1.31207800  | H | 0.25910100  | 1.32385600  | -1.30021000 |
| H | -5.87853600 | -3.33681200 | -0.60641200 | C | -1.90493200 | 3.29111100  | -2.03311800 |
| H | -5.27703200 | -1.34129300 | 3.15278200  | H | -2.22891700 | 2.28305200  | -2.30247500 |
| H | -6.78644700 | -2.51591900 | 1.56280700  | H | -2.78553100 | 3.83831900  | -1.67714400 |
| C | -0.94442400 | -2.91319700 | -0.39355700 | C | -1.39261600 | 3.99259200  | -3.30991600 |
| C | -0.00186200 | -2.86319000 | -1.42434400 | H | -2.19096100 | 3.98245400  | -4.05743500 |

|   |             |             |             |
|---|-------------|-------------|-------------|
| H | -0.54274100 | 3.42707600  | -3.71865000 |
| O | -1.06044700 | 5.35501200  | -3.10462700 |
| H | -0.26813100 | 5.38460800  | -2.55147700 |
| O | 1.32042000  | -3.90309400 | 2.18351900  |
| H | 1.86042700  | -3.25794200 | 1.68040900  |
| H | 0.91420900  | -4.43718000 | 1.48511300  |
